# Supplementary material for: Dominance of Three Sublineages of the SARS-CoV-2 Delta Variant in Mexico
Source: Preprints.org preprint supplement (doi:10.20944/preprints202205.0131.v1), 2022-05-10
Supplement: Supplementary file 1 [file Table_S1.xlsx]

## Sheet: Table_S1
	Table S1. Patient demographic and clinical characteristics of Mexican sequences classified as Delta and reported as of 14 December,2021. The information of the 6696 genome sequences generated by us are shown in blue.
	Virus name	Accession ID	Genbank ID	Collection date	Mexian state	Patient age	Gender	Patient status	Specimen	Pangolin Lineage
	hCoV-19/Mexico/AGU_IBT_IMSS_2117/2021	EPI_ISL_3347898		2021-07-17	Aguascalientes	18	Female		GK	AY.13
	hCoV-19/Mexico/AGU_IBT_IMSS_2118/2021	EPI_ISL_3347899		2021-07-18	Aguascalientes	18	Female		GK	AY.20
	hCoV-19/Mexico/AGU_IBT_IMSS_2562/2021	EPI_ISL_4006689		2021-08-13	Aguascalientes	86	Male		GK	AY.20
	hCoV-19/Mexico/AGU_IBT_IMSS_2563/2021	EPI_ISL_4006690		2021-08-16	Aguascalientes	32	Female		GK	AY.3
	hCoV-19/Mexico/AGU_IBT_IMSS_2568/2021	EPI_ISL_4006695		2021-08-17	Aguascalientes	41	Female		GK	AY.20
	hCoV-19/Mexico/AGU_IBT_IMSS_2569/2021	EPI_ISL_4006696		2021-08-17	Aguascalientes	61	Male		GK	AY.100
	hCoV-19/Mexico/AGU_IBT_IMSS_2570/2021	EPI_ISL_4006697		2021-08-18	Aguascalientes	13	Female		GK	AY.20
	hCoV-19/Mexico/AGU_IBT_IMSS_2571/2021	EPI_ISL_4006698		2021-08-18	Aguascalientes	64	Female		GK	AY.26
	hCoV-19/Mexico/AGU_IBT_IMSS_2585/2021	EPI_ISL_4006712		2021-08-19	Aguascalientes	31	Female		GK	AY.26
	hCoV-19/Mexico/AGU_IBT_IMSS_3037/2021	EPI_ISL_4878948		2021-09-08	Aguascalientes	73	Male		GK	AY.26
	hCoV-19/Mexico/AGU_IBT_IMSS_3038/2021	EPI_ISL_4878949		2021-09-09	Aguascalientes	14	Female		GK	AY.20
	hCoV-19/Mexico/AGU_IBT_IMSS_3039/2021	EPI_ISL_4878950		2021-09-09	Aguascalientes	25	Female		GK	AY.20
	hCoV-19/Mexico/AGU_IBT_IMSS_3065/2021	EPI_ISL_4878970		2021-09-10	Aguascalientes	11	Female		GK	AY.20
	hCoV-19/Mexico/AGU_IBT_IMSS_3071/2021	EPI_ISL_4878976		2021-09-10	Aguascalientes	74	Female		GK	AY.122
	hCoV-19/Mexico/AGU_IBT_IMSS_3521/2021	EPI_ISL_5937031		2021-09-30	Aguascalientes	27	Female		GK	AY.3
	hCoV-19/Mexico/AGU_IBT_IMSS_3526/2021	EPI_ISL_5937032		2021-10-06	Aguascalientes	30	Female		GK	AY.3
	hCoV-19/Mexico/AGU_IBT_IMSS_3527/2021	EPI_ISL_5937033		2021-10-05	Aguascalientes	25	Female		GK	AY.3
	hCoV-19/Mexico/AGU_IBT_IMSS_3553/2021	EPI_ISL_5937034		2021-10-11	Aguascalientes	27	Female		GK	AY.20
	hCoV-19/Mexico/AGU_IBT_IMSS_3558/2021	EPI_ISL_5937035		2021-10-13	Aguascalientes	30	Male		GK	AY.43
	hCoV-19/Mexico/AGU_IBT_IMSS_4015/2021	EPI_ISL_6863798		2021-11-02	Aguascalientes	30	Female		GK	AY.20
	hCoV-19/Mexico/AGU_INER_IMSS_1975/2021	EPI_ISL_3557247		2021-07-26	Aguascalientes	31	Female		GK	AY.13
	hCoV-19/Mexico/AGU_INER_IMSS_1976/2021	EPI_ISL_3557248		2021-07-26	Aguascalientes	64	Female		GK	AY.20
	hCoV-19/Mexico/AGU_INER_IMSS_1977/2021	EPI_ISL_3557249		2021-07-26	Aguascalientes	40	Male		GK	AY.26
	hCoV-19/Mexico/AGU_INER_IMSS_2315/2021	EPI_ISL_4299738		2021-08-20	Aguascalientes	49	Male		GK	AY.20
	hCoV-19/Mexico/AGU_INER_IMSS_2328/2021	EPI_ISL_4299751		2021-08-21	Aguascalientes	5	Male		GK	AY.3
	hCoV-19/Mexico/AGU_INER_IMSS_2329/2021	EPI_ISL_4299752		2021-08-23	Aguascalientes	88	Female		GK	AY.3
	hCoV-19/Mexico/AGU_INER_IMSS_2330/2021	EPI_ISL_4299753		2021-08-23	Aguascalientes	23	Male		GK	AY.13
	hCoV-19/Mexico/AGU_INER_IMSS_2708/2021	EPI_ISL_5194284		2021-09-15	Aguascalientes	31	Male		GK	AY.20
	hCoV-19/Mexico/AGU_INER_IMSS_2709/2021	EPI_ISL_5194285		2021-09-16	Aguascalientes	32	Female		GK	AY.26
	hCoV-19/Mexico/AGU_INER_IMSS_2719/2021	EPI_ISL_5194286		2021-09-21	Aguascalientes	58	Male		GK	AY.20
	hCoV-19/Mexico/AGU_INER_IMSS_2720/2021	EPI_ISL_5194287		2021-09-21	Aguascalientes	59	Female		GK	AY.20
	hCoV-19/Mexico/AGU_INER_IMSS_3078/2021	EPI_ISL_6227566		2021-10-18	Aguascalientes	26	Male		GK	AY.29.1
	hCoV-19/Mexico/AGU_INER_IMSS_3090/2021	EPI_ISL_6227487		2021-10-20	Aguascalientes	38	Male		GK	AY.3
	hCoV-19/Mexico/AGU_LANGEBIO_IMSS_18490_NC/2021	EPI_ISL_5851125		2021-09-24	Aguascalientes	25	Male		GK	AY.20
	hCoV-19/Mexico/AGU_LANGEBIO_IMSS_2338/2021	EPI_ISL_3805648		2021-07-29	Aguascalientes	26	Female		GK	AY.26
	hCoV-19/Mexico/AGU_LANGEBIO_IMSS_2339/2021	EPI_ISL_3805755		2021-07-30	Aguascalientes	35	Female		GK	AY.20
	hCoV-19/Mexico/AGU_LANGEBIO_IMSS_2343/2021	EPI_ISL_3805759		2021-07-31	Aguascalientes	21	Male		GK	AY.20
	hCoV-19/Mexico/AGU_LANGEBIO_IMSS_2634/2021	EPI_ISL_4549813		2021-08-27	Aguascalientes	48	Female		GK	AY.26
	hCoV-19/Mexico/AGU_LANGEBIO_IMSS_2635/2021	EPI_ISL_4549814		2021-08-27	Aguascalientes	53	Male		GK	AY.20
	hCoV-19/Mexico/AGU_LANGEBIO_IMSS_3089/2021	EPI_ISL_5851126		2021-09-24	Aguascalientes	57	Male		GK	AY.20
	hCoV-19/Mexico/AGU_LANGEBIO_IMSS_3090/2021	EPI_ISL_5851127		2021-09-24	Aguascalientes	16	Female		GK	AY.3
	hCoV-19/Mexico/AGU_LANGEBIO_IMSS_3098/2021	EPI_ISL_5851136		2021-09-27	Aguascalientes	12	Male		GK	AY.20
	hCoV-19/Mexico/BCN_IBT_IMSS_2423/2021	EPI_ISL_3347721		2021-07-16	Baja_California	30	Female		GK	AY.26
	hCoV-19/Mexico/BCN_IBT_IMSS_2424/2021	EPI_ISL_3347722		2021-07-17	Baja_California	4	Female		GK	AY.26
	hCoV-19/Mexico/BCN_IBT_IMSS_2902/2021	EPI_ISL_4006421		2021-08-13	Baja_California	49	Male		GK	AY.20
	hCoV-19/Mexico/BCN_IBT_IMSS_2928/2021	EPI_ISL_4006447		2021-08-13	Baja_California	73	Female		GK	AY.26
	hCoV-19/Mexico/BCN_IBT_IMSS_2935/2021	EPI_ISL_4006454		2021-08-16	Baja_California	35	Female		GK	AY.62
	hCoV-19/Mexico/BCN_IBT_IMSS_2936/2021	EPI_ISL_4006455		2021-08-16	Baja_California	57	Female		GK	AY.20
	hCoV-19/Mexico/BCN_IBT_IMSS_2937/2021	EPI_ISL_4006456		2021-08-13	Baja_California	64	Male		GK	AY.113
	hCoV-19/Mexico/BCN_IBT_IMSS_2981/2021	EPI_ISL_4006500		2021-08-18	Baja_California	26	Female		GK	AY.14
	hCoV-19/Mexico/BCN_IBT_IMSS_3433/2021	EPI_ISL_4878759		2021-09-09	Baja_California	66	Male		GK	AY.25
	hCoV-19/Mexico/BCN_IBT_IMSS_3434/2021	EPI_ISL_4878760		2021-09-09	Baja_California	72	Female		GK	AY.44
	hCoV-19/Mexico/BCN_IBT_IMSS_3435/2021	EPI_ISL_4878761		2021-09-09	Baja_California	69	Female		GK	AY.26
	hCoV-19/Mexico/BCN_IBT_IMSS_3436/2021	EPI_ISL_4878762		2021-09-09	Baja_California	61	Female		GK	AY.26
	hCoV-19/Mexico/BCN_IBT_IMSS_3437/2021	EPI_ISL_4878763		2021-09-09	Baja_California	45	Male		GK	AY.119
	hCoV-19/Mexico/BCN_IBT_IMSS_3438/2021	EPI_ISL_4878764		2021-09-09	Baja_California	66	Male		GK	AY.26
	hCoV-19/Mexico/BCN_IBT_IMSS_3439/2021	EPI_ISL_4878765		2021-09-09	Baja_California	21	Female		GK	AY.26
	hCoV-19/Mexico/BCN_IBT_IMSS_3440/2021	EPI_ISL_4878766		2021-09-08	Baja_California	50	Female		GK	AY.26
	hCoV-19/Mexico/BCN_IBT_IMSS_3441/2021	EPI_ISL_4879041		2021-09-08	Baja_California	24	Male		GK	AY.100
	hCoV-19/Mexico/BCN_IBT_IMSS_3451/2021	EPI_ISL_4878773		2021-09-12	Baja_California	46	Male		GK	AY.113
	hCoV-19/Mexico/BCN_IBT_IMSS_3452/2021	EPI_ISL_4878774		2021-09-13	Baja_California	34	Female		GK	AY.26
	hCoV-19/Mexico/BCN_IBT_IMSS_3453/2021	EPI_ISL_4879048		2021-09-13	Baja_California	27	Female		GK	AY.103
	hCoV-19/Mexico/BCN_IBT_IMSS_3454/2021	EPI_ISL_4879012		2021-09-13	Baja_California	29	Female		GK	B.1.617.2
	hCoV-19/Mexico/BCN_IBT_IMSS_3455/2021	EPI_ISL_4878775		2021-09-13	Baja_California	37	Female		GK	AY.113
	hCoV-19/Mexico/BCN_IBT_IMSS_3456/2021	EPI_ISL_4878776		2021-09-13	Baja_California	24	Male		GK	AY.100
	hCoV-19/Mexico/BCN_IBT_IMSS_3457/2021	EPI_ISL_4879013		2021-09-10	Baja_California	23	Male		GK	AY.100
	hCoV-19/Mexico/BCN_IBT_IMSS_3458/2021	EPI_ISL_4878777		2021-09-10	Baja_California	43	Male		GK	AY.26
	hCoV-19/Mexico/BCN_IBT_IMSS_3459/2021	EPI_ISL_4878778		2021-09-13	Baja_California	50	Female		GK	AY.20
	hCoV-19/Mexico/BCN_IBT_IMSS_3501/2021	EPI_ISL_4878815		2021-09-10	Baja_California	51	Male		GK	AY.100
	hCoV-19/Mexico/BCN_IBT_IMSS_3502/2021	EPI_ISL_4878816		2021-09-13	Baja_California	30	Female		GK	AY.113
	hCoV-19/Mexico/BCN_IBT_IMSS_3817/2021	EPI_ISL_5936686		2021-10-01	Baja_California	20	Female		GK	AY.100
	hCoV-19/Mexico/BCN_IBT_IMSS_3823/2021	EPI_ISL_5937004		2021-10-04	Baja_California	19	Female		GK	AY.113
	hCoV-19/Mexico/BCN_IBT_IMSS_3858/2021	EPI_ISL_5936578		2021-10-05	Baja_California	32	Female		GK	AY.113
	hCoV-19/Mexico/BCN_IBT_IMSS_3859/2021	EPI_ISL_5936613		2021-10-06	Baja_California	57	Male		GK	AY.103
	hCoV-19/Mexico/BCN_IBT_IMSS_3860/2021	EPI_ISL_5937005		2021-10-07	Baja_California	56	Male		GK	AY.26
	hCoV-19/Mexico/BCN_IBT_IMSS_3861/2021	EPI_ISL_5937006		2021-10-07	Baja_California	51	Female		GK	AY.113
	hCoV-19/Mexico/BCN_IBT_IMSS_3862/2021	EPI_ISL_5936648		2021-10-07	Baja_California	48	Male		GK	AY.100
	hCoV-19/Mexico/BCN_IBT_IMSS_3907/2021	EPI_ISL_5937007		2021-10-07	Baja_California	88	Male		GK	AY.113
	hCoV-19/Mexico/BCN_IBT_IMSS_3908/2021	EPI_ISL_5937008		2021-10-07	Baja_California	36	Female		GK	AY.113
	hCoV-19/Mexico/BCN_IBT_IMSS_3909/2021	EPI_ISL_5937009		2021-10-07	Baja_California	56	Female		GK	AY.113
	hCoV-19/Mexico/BCN_IBT_IMSS_3910/2021	EPI_ISL_5937010		2021-10-08	Baja_California	81	Male		GK	AY.113
	hCoV-19/Mexico/BCN_IBT_IMSS_3911/2021	EPI_ISL_5937011		2021-10-08	Baja_California	67	Male		GK	AY.113
	hCoV-19/Mexico/BCN_IBT_IMSS_3912/2021	EPI_ISL_5936604		2021-10-09	Baja_California	61	Male		GK	AY.100
	hCoV-19/Mexico/BCN_IBT_IMSS_3913/2021	EPI_ISL_5937012		2021-10-09	Baja_California	50	Male		GK	AY.3
	hCoV-19/Mexico/BCN_IBT_IMSS_3914/2021	EPI_ISL_5936662		2021-10-09	Baja_California	50	Male		GK	AY.122
	hCoV-19/Mexico/BCN_IBT_IMSS_3915/2021	EPI_ISL_5937013		2021-10-09	Baja_California	25	Male		GK	AY.118
	hCoV-19/Mexico/BCN_IBT_IMSS_3916/2021	EPI_ISL_5937014		2021-10-09	Baja_California	90	Male		GK	AY.113
	hCoV-19/Mexico/BCN_IBT_IMSS_3917/2021	EPI_ISL_5937015		2021-10-09	Baja_California	57	Male		GK	AY.26
	hCoV-19/Mexico/BCN_IBT_IMSS_3918/2021	EPI_ISL_5936706		2021-10-08	Baja_California	70	Female		GK	AY.44
	hCoV-19/Mexico/BCN_IBT_IMSS_3919/2021	EPI_ISL_5937016		2021-10-09	Baja_California	75	Male		GK	AY.118
	hCoV-19/Mexico/BCN_IBT_IMSS_3920/2021	EPI_ISL_5937017		2021-10-10	Baja_California	52	Female		GK	AY.26
	hCoV-19/Mexico/BCN_IBT_IMSS_3921/2021	EPI_ISL_5937018		2021-10-10	Baja_California	48	Female		GK	AY.26
	hCoV-19/Mexico/BCN_IBT_IMSS_3922/2021	EPI_ISL_5936569		2021-10-10	Baja_California	27	Female		GK	AY.113
	hCoV-19/Mexico/BCN_IBT_IMSS_3923/2021	EPI_ISL_5936614		2021-10-10	Baja_California	68	Female		GK	AY.103
	hCoV-19/Mexico/BCN_IBT_IMSS_3924/2021	EPI_ISL_5937019		2021-10-10	Baja_California	35	Female		GK	AY.100
	hCoV-19/Mexico/BCN_IBT_IMSS_3925/2021	EPI_ISL_5937020		2021-10-06	Baja_California	31	Female		GK	AY.103
	hCoV-19/Mexico/BCN_IBT_IMSS_3926/2021	EPI_ISL_5937093		2021-10-08	Baja_California	22	Male		GK	AY.103
	hCoV-19/Mexico/BCN_IBT_IMSS_3927/2021	EPI_ISL_5937021		2021-10-05	Baja_California	44	Female		GK	AY.113
	hCoV-19/Mexico/BCN_IBT_IMSS_3928/2021	EPI_ISL_5937022		2021-10-08	Baja_California	22	Male		GK	AY.42
	hCoV-19/Mexico/BCN_IBT_IMSS_3929/2021	EPI_ISL_5936687		2021-10-08	Baja_California	12	Male		GK	AY.100
	hCoV-19/Mexico/BCN_IBT_IMSS_3953/2021	EPI_ISL_5937023		2021-10-11	Baja_California	31	Male		GK	AY.20
	hCoV-19/Mexico/BCN_IBT_IMSS_3954/2021	EPI_ISL_5937024		2021-10-11	Baja_California	24	Male		GK	AY.25
	hCoV-19/Mexico/BCN_IBT_IMSS_3977/2021	EPI_ISL_5937025		2021-10-12	Baja_California	34	Female		GK	AY.103
	hCoV-19/Mexico/BCN_IBT_IMSS_3978/2021	EPI_ISL_5937026		2021-10-12	Baja_California	19	Male		GK	AY.20
	hCoV-19/Mexico/BCN_IBT_IMSS_3989/2021	EPI_ISL_5937027		2021-10-14	Baja_California	78	Female		GK	AY.100
	hCoV-19/Mexico/BCN_IBT_IMSS_3990/2021	EPI_ISL_5937028		2021-10-14	Baja_California	61	Female		GK	AY.47
	hCoV-19/Mexico/BCN_IBT_IMSS_3991/2021	EPI_ISL_5937029		2021-10-14	Baja_California	45	Female		GK	AY.20
	hCoV-19/Mexico/BCN_IBT_IMSS_3992/2021	EPI_ISL_5937030		2021-10-14	Baja_California	99	Female		GK	AY.20
	hCoV-19/Mexico/BCN_IBT_IMSS_4263/2021	EPI_ISL_6863473		2021-10-28	Baja_California	31	Female		GK	AY.103
	hCoV-19/Mexico/BCN_IBT_IMSS_4264/2021	EPI_ISL_6863474		2021-10-28	Baja_California	21	Female		GK	AY.20
	hCoV-19/Mexico/BCN_IBT_IMSS_4265/2021	EPI_ISL_6863475		2021-10-27	Baja_California	61	Female		GK	AY.100
	hCoV-19/Mexico/BCN_IBT_IMSS_4266/2021	EPI_ISL_6863476		2021-10-27	Baja_California	51	Female		GK	AY.3
	hCoV-19/Mexico/BCN_IBT_IMSS_4267/2021	EPI_ISL_6863477		2021-10-27	Baja_California	21	Male		GK	AY.20
	hCoV-19/Mexico/BCN_IBT_IMSS_4268/2021	EPI_ISL_6863478		2021-10-27	Baja_California	31	Female		GK	AY.103
	hCoV-19/Mexico/BCN_IBT_IMSS_4269/2021	EPI_ISL_6863479		2021-10-26	Baja_California	19	Male		GK	AY.44
	hCoV-19/Mexico/BCN_IBT_IMSS_4270/2021	EPI_ISL_6863480		2021-10-26	Baja_California	64	Male		GK	AY.92
	hCoV-19/Mexico/BCN_IBT_IMSS_4271/2021	EPI_ISL_6863481		2021-10-26	Baja_California	26	Male		GK	AY.20
	hCoV-19/Mexico/BCN_IBT_IMSS_4272/2021	EPI_ISL_6863482		2021-10-26	Baja_California	30	Female		GK	AY.20
	hCoV-19/Mexico/BCN_IBT_IMSS_4273/2021	EPI_ISL_6863483		2021-10-26	Baja_California	43	Female		GK	AY.20
	hCoV-19/Mexico/BCN_IBT_IMSS_4274/2021	EPI_ISL_6863484		2021-10-25	Baja_California	48	Female		GK	AY.20
	hCoV-19/Mexico/BCN_IBT_IMSS_4275/2021	EPI_ISL_6863485		2021-10-25	Baja_California	25	Female		GK	AY.43
	hCoV-19/Mexico/BCN_IBT_IMSS_4276/2021	EPI_ISL_6863486		2021-10-29	Baja_California	19	Female		GK	AY.103
	hCoV-19/Mexico/BCN_IBT_IMSS_4277/2021	EPI_ISL_6863487		2021-10-28	Baja_California	35	Female		GK	AY.103
	hCoV-19/Mexico/BCN_IBT_IMSS_4281/2021	EPI_ISL_6863491		2021-11-02	Baja_California	48	Male		GK	AY.100
	hCoV-19/Mexico/BCN_IBT_IMSS_4282/2021	EPI_ISL_6863492		2021-11-02	Baja_California	47	Female		GK	AY.100
	hCoV-19/Mexico/BCN_IBT_IMSS_4283/2021	EPI_ISL_6863495		2021-11-02	Baja_California	62	Female		GK	AY.119
	hCoV-19/Mexico/BCN_IBT_IMSS_4284/2021	EPI_ISL_6863496		2021-11-02	Baja_California	62	Male		GK	AY.103
	hCoV-19/Mexico/BCN_IBT_IMSS_4285/2021	EPI_ISL_6863497		2021-11-02	Baja_California	74	Male		GK	AY.100
	hCoV-19/Mexico/BCN_IBT_IMSS_4286/2021	EPI_ISL_6863498		2021-11-02	Baja_California	46	Male		GK	AY.26
	hCoV-19/Mexico/BCN_IBT_IMSS_4287/2021	EPI_ISL_6863499		2021-11-02	Baja_California	35	Female		GK	AY.113
	hCoV-19/Mexico/BCN_IBT_IMSS_4322/2021	EPI_ISL_6863534		2021-11-02	Baja_California	33	Male		GK	AY.44
	hCoV-19/Mexico/BCN_IBT_IMSS_4323/2021	EPI_ISL_6863535		2021-11-02	Baja_California	52	Male		GK	AY.119
	hCoV-19/Mexico/BCN_IBT_IMSS_4324/2021	EPI_ISL_6863536		2021-11-02	Baja_California	24	Female		GK	AY.44
	hCoV-19/Mexico/BCN_IBT_IMSS_4325/2021	EPI_ISL_6863537		2021-11-02	Baja_California	30	Female		GK	AY.113
	hCoV-19/Mexico/BCN_IBT_IMSS_4326/2021	EPI_ISL_6863538		2021-11-02	Baja_California	38	Male		GK	AY.103
	hCoV-19/Mexico/BCN_IBT_IMSS_4327/2021	EPI_ISL_6863539		2021-11-02	Baja_California	20	Male		GK	AY.26
	hCoV-19/Mexico/BCN_IBT_IMSS_4328/2021	EPI_ISL_6863540		2021-11-02	Baja_California	36	Male		GK	AY.113
	hCoV-19/Mexico/BCN_IBT_IMSS_4329/2021	EPI_ISL_6863541		2021-11-02	Baja_California	51	Male		GK	AY.100
	hCoV-19/Mexico/BCN_IBT_IMSS_4330/2021	EPI_ISL_6863542		2021-11-02	Baja_California	31	Female		GK	AY.113
	hCoV-19/Mexico/BCN_IBT_IMSS_4331/2021	EPI_ISL_6863543		2021-11-02	Baja_California	23	Male		GK	AY.100
	hCoV-19/Mexico/BCN_IBT_IMSS_4332/2021	EPI_ISL_6863544		2021-11-02	Baja_California	48	Female		GK	AY.100
	hCoV-19/Mexico/BCN_IBT_IMSS_4333/2021	EPI_ISL_6863545		2021-11-02	Baja_California	41	Female		GK	AY.113
	hCoV-19/Mexico/BCN_IBT_IMSS_4334/2021	EPI_ISL_6863546		2021-11-02	Baja_California	34	Female		GK	AY.103
	hCoV-19/Mexico/BCN_IBT_IMSS_4335/2021	EPI_ISL_6863547		2021-11-02	Baja_California	48	Male		GK	AY.103
	hCoV-19/Mexico/BCN_IBT_IMSS_4336/2021	EPI_ISL_6863548		2021-11-03	Baja_California	59	Female		GK	AY.117
	hCoV-19/Mexico/BCN_IBT_IMSS_4337/2021	EPI_ISL_6863549		2021-11-02	Baja_California	35	Female		GK	AY.113
	hCoV-19/Mexico/BCN_IBT_IMSS_4338/2021	EPI_ISL_6863550		2021-11-03	Baja_California	41	Female		GK	AY.47
	hCoV-19/Mexico/BCN_IBT_IMSS_4339/2021	EPI_ISL_6863551		2021-11-02	Baja_California	29	Female		GK	AY.113
	hCoV-19/Mexico/BCN_IBT_IMSS_4340/2021	EPI_ISL_6863552		2021-11-02	Baja_California	66	Male		GK	AY.113
	hCoV-19/Mexico/BCN_IBT_IMSS_4341/2021	EPI_ISL_6863553		2021-11-02	Baja_California	47	Female		GK	AY.3
	hCoV-19/Mexico/BCN_IBT_IMSS_4342/2021	EPI_ISL_6863554		2021-11-03	Baja_California	43	Male		GK	AY.25
	hCoV-19/Mexico/BCN_IBT_IMSS_4343/2021	EPI_ISL_6863555		2021-11-03	Baja_California	37	Male		GK	AY.95
	hCoV-19/Mexico/BCN_IBT_IMSS_4344/2021	EPI_ISL_6863556		2021-11-02	Baja_California	89	Female		GK	AY.20
	hCoV-19/Mexico/BCN_IBT_IMSS_4345/2021	EPI_ISL_6863557		2021-11-03	Baja_California	27	Female		GK	AY.113
	hCoV-19/Mexico/BCN_IBT_IMSS_4346/2021	EPI_ISL_6863558		2021-11-03	Baja_California	31	Female		GK	AY.100
	hCoV-19/Mexico/BCN_IBT_IMSS_4360/2021	EPI_ISL_6863574		2021-11-05	Baja_California	27	Female		GK	AY.39
	hCoV-19/Mexico/BCN_IBT_IMSS_4361/2021	EPI_ISL_6863575		2021-11-05	Baja_California	24	Female		GK	AY.3
	hCoV-19/Mexico/BCN_IBT_IMSS_4362/2021	EPI_ISL_6863576		2021-11-05	Baja_California	51	Male		GK	AY.26
	hCoV-19/Mexico/BCN_IBT_IMSS_4363/2021	EPI_ISL_6863577		2021-11-05	Baja_California	44	Female		GK	AY.103
	hCoV-19/Mexico/BCN_IBT_IMSS_4364/2021	EPI_ISL_6863578		2021-11-05	Baja_California	69	Female		GK	AY.39
	hCoV-19/Mexico/BCN_IBT_IMSS_4365/2021	EPI_ISL_6863579		2021-11-05	Baja_California	63	Male		GK	AY.103
	hCoV-19/Mexico/BCN_IBT_IMSS_4366/2021	EPI_ISL_6863580		2021-11-05	Baja_California	77	Male		GK	AY.103
	hCoV-19/Mexico/BCN_IBT_IMSS_4367/2021	EPI_ISL_6863581		2021-11-05	Baja_California	42	Male		GK	AY.44
	hCoV-19/Mexico/BCN_IBT_IMSS_4368/2021	EPI_ISL_6863582		2021-11-05	Baja_California	49	Male		GK	AY.100
	hCoV-19/Mexico/BCN_IBT_IMSS_4369/2021	EPI_ISL_6863583		2021-11-05	Baja_California	58	Male		GK	AY.26
	hCoV-19/Mexico/BCN_IBT_IMSS_4370/2021	EPI_ISL_6863584		2021-11-05	Baja_California	67	Female		GK	AY.103
	hCoV-19/Mexico/BCN_IBT_IMSS_4371/2021	EPI_ISL_6863585		2021-11-05	Baja_California	57	Female		GK	AY.122
	hCoV-19/Mexico/BCN_IBT_IMSS_4372/2021	EPI_ISL_6863586		2021-11-05	Baja_California	34	Male		GK	AY.20
	hCoV-19/Mexico/BCN_IBT_IMSS_4373/2021	EPI_ISL_6863587		2021-11-04	Baja_California	60	Male		GK	AY.26
	hCoV-19/Mexico/BCN_IBT_IMSS_4374/2021	EPI_ISL_6863588		2021-11-04	Baja_California	66	Male		GK	AY.39
	hCoV-19/Mexico/BCN_IBT_IMSS_4375/2021	EPI_ISL_6863589		2021-11-04	Baja_California	42	Male		GK	AY.20
	hCoV-19/Mexico/BCN_IBT_IMSS_4376/2021	EPI_ISL_6863592		2021-11-04	Baja_California	33	Male		GK	AY.103
	hCoV-19/Mexico/BCN_IBT_IMSS_4377/2021	EPI_ISL_6863593		2021-11-04	Baja_California	35	Female		GK	AY.113
	hCoV-19/Mexico/BCN_IBT_IMSS_4378/2021	EPI_ISL_6863594		2021-11-04	Baja_California	29	Male		GK	AY.103
	hCoV-19/Mexico/BCN_IBT_IMSS_4379/2021	EPI_ISL_6863595		2021-11-04	Baja_California	41	Female		GK	AY.20
	hCoV-19/Mexico/BCN_IBT_IMSS_4380/2021	EPI_ISL_6863596		2021-11-03	Baja_California	69	Male		GK	AY.44
	hCoV-19/Mexico/BCN_IBT_IMSS_4381/2021	EPI_ISL_6863597		2021-11-03	Baja_California	24	Male		GK	AY.103
	hCoV-19/Mexico/BCN_IBT_IMSS_4382/2021	EPI_ISL_6863598		2021-11-03	Baja_California	59	Male		GK	AY.39
	hCoV-19/Mexico/BCN_IBT_IMSS_4383/2021	EPI_ISL_6863599		2021-11-03	Baja_California	28	Male		GK	AY.113
	hCoV-19/Mexico/BCN_IBT_IMSS_4384/2021	EPI_ISL_6863600		2021-11-03	Baja_California	49	Male		GK	AY.103
	hCoV-19/Mexico/BCN_IBT_IMSS_4385/2021	EPI_ISL_6863601		2021-11-03	Baja_California	19	Male		GK	AY.103
	hCoV-19/Mexico/BCN_IBT_IMSS_4386/2021	EPI_ISL_6863602		2021-11-03	Baja_California	7	Female		GK	AY.3
	hCoV-19/Mexico/BCN_IBT_IMSS_4387/2021	EPI_ISL_6863603		2021-11-03	Baja_California	26	Female		GK	AY.20
	hCoV-19/Mexico/BCN_IBT_IMSS_4388/2021	EPI_ISL_6863604		2021-11-05	Baja_California	41	Female		GK	AY.100
	hCoV-19/Mexico/BCN_IBT_IMSS_4389/2021	EPI_ISL_6863605		2021-11-03	Baja_California	49	Female		GK	AY.100
	hCoV-19/Mexico/BCN_IBT_IMSS_4390/2021	EPI_ISL_6863606		2021-11-05	Baja_California	49	Male		GK	AY.26
	hCoV-19/Mexico/BCN_IBT_IMSS_4391/2021	EPI_ISL_6863607		2021-11-05	Baja_California	32	Male		GK	AY.20
	hCoV-19/Mexico/BCN_IBT_IMSS_4392/2021	EPI_ISL_6863608		2021-11-05	Baja_California	46	Female		GK	AY.100
	hCoV-19/Mexico/BCN_IBT_IMSS_4393/2021	EPI_ISL_6863609		2021-11-05	Baja_California	21	Male		GK	AY.113
	hCoV-19/Mexico/BCN_IBT_IMSS_4394/2021	EPI_ISL_6863610		2021-11-05	Baja_California	38	Male		GK	AY.100
	hCoV-19/Mexico/BCN_IBT_IMSS_4395/2021	EPI_ISL_6863611		2021-11-02	Baja_California	51	Female		GK	AY.119
	hCoV-19/Mexico/BCN_IBT_IMSS_4396/2021	EPI_ISL_6863612		2021-11-04	Baja_California	83	Male		GK	AY.103
	hCoV-19/Mexico/BCN_IBT_IMSS_4397/2021	EPI_ISL_6863613		2021-11-04	Baja_California	40	Male		GK	AY.26
	hCoV-19/Mexico/BCN_IBT_IMSS_4398/2021	EPI_ISL_6863614		2021-11-04	Baja_California	84	Male		GK	AY.44
	hCoV-19/Mexico/BCN_IBT_IMSS_4399/2021	EPI_ISL_6863615		2021-11-03	Baja_California	80	Male		GK	AY.103
	hCoV-19/Mexico/BCN_IBT_IMSS_4400/2021	EPI_ISL_6863616		2021-11-03	Baja_California	62	Female		GK	AY.113
	hCoV-19/Mexico/BCN_IBT_IMSS_4401/2021	EPI_ISL_6863617		2021-11-03	Baja_California	51	Male		GK	AY.113
	hCoV-19/Mexico/BCN_IBT_IMSS_4402/2021	EPI_ISL_6863618		2021-11-03	Baja_California	62	Male		GK	AY.26
	hCoV-19/Mexico/BCN_IBT_IMSS_4403/2021	EPI_ISL_6863619		2021-11-03	Baja_California	42	Male		GK	AY.100
	hCoV-19/Mexico/BCN_IBT_IMSS_4404/2021	EPI_ISL_6863620		2021-11-03	Baja_California	91	Male		GK	AY.113
	hCoV-19/Mexico/BCN_IBT_IMSS_4405/2021	EPI_ISL_6863621		2021-11-03	Baja_California	26	Female		GK	AY.103
	hCoV-19/Mexico/BCN_IBT_IMSS_4406/2021	EPI_ISL_6863622		2021-11-03	Baja_California	53	Female		GK	AY.20
	hCoV-19/Mexico/BCN_IBT_IMSS_4407/2021	EPI_ISL_6863623		2021-11-03	Baja_California	30	Female		GK	AY.3
	hCoV-19/Mexico/BCN_IBT_IMSS_4408/2021	EPI_ISL_6863624		2021-11-04	Baja_California	44	Male		GK	AY.44
	hCoV-19/Mexico/BCN_IBT_IMSS_4409/2021	EPI_ISL_6863625		2021-11-04	Baja_California	25	Male		GK	AY.113
	hCoV-19/Mexico/BCN_IBT_IMSS_4410/2021	EPI_ISL_6863626		2021-11-04	Baja_California	41	Female		GK	AY.103
	hCoV-19/Mexico/BCN_IBT_IMSS_4411/2021	EPI_ISL_6863627		2021-11-05	Baja_California	31	Male		GK	AY.103
	hCoV-19/Mexico/BCN_IBT_IMSS_4412/2021	EPI_ISL_6863628		2021-11-02	Baja_California	62	Male		GK	AY.100
	hCoV-19/Mexico/BCN_IBT_IMSS_4416/2021	EPI_ISL_6863632		2021-11-02	Baja_California	53	Female		GK	AY.26
	hCoV-19/Mexico/BCN_IBT_IMSS_4424/2021	EPI_ISL_6863640		2021-11-06	Baja_California	58	Female		GK	AY.25
	hCoV-19/Mexico/BCN_IBT_IMSS_4425/2021	EPI_ISL_6863641		2021-11-05	Baja_California	39	Male		GK	AY.26
	hCoV-19/Mexico/BCN_IBT_IMSS_4426/2021	EPI_ISL_6863642		2021-11-06	Baja_California	38	Female		GK	AY.113
	hCoV-19/Mexico/BCN_IBT_IMSS_4427/2021	EPI_ISL_6863643		2021-11-06	Baja_California	88	Male		GK	AY.20
	hCoV-19/Mexico/BCN_IBT_IMSS_4428/2021	EPI_ISL_6863644		2021-11-04	Baja_California	37	Male		GK	AY.100
	hCoV-19/Mexico/BCN_IBT_IMSS_4446/2021	EPI_ISL_6863663		2021-11-05	Baja_California	63	Male		GK	AY.95
	hCoV-19/Mexico/BCN_IBT_IMSS_4447/2021	EPI_ISL_6863664		2021-11-04	Baja_California	63	Male		GK	AY.95
	hCoV-19/Mexico/BCN_IBT_IMSS_4448/2021	EPI_ISL_6863665		2021-11-04	Baja_California	72	Male		GK	AY.100
	hCoV-19/Mexico/BCN_IBT_IMSS_4449/2021	EPI_ISL_6863666		2021-11-04	Baja_California	51	Female		GK	AY.20
	hCoV-19/Mexico/BCN_IBT_IMSS_4450/2021	EPI_ISL_6863667		2021-11-05	Baja_California	86	Female		GK	AY.103
	hCoV-19/Mexico/BCN_IBT_IMSS_4451/2021	EPI_ISL_6863668		2021-11-06	Baja_California	49	Male		GK	AY.26
	hCoV-19/Mexico/BCN_IBT_IMSS_4452/2021	EPI_ISL_6863669		2021-11-04	Baja_California	24	Female		GK	AY.20
	hCoV-19/Mexico/BCN_IBT_IMSS_4453/2021	EPI_ISL_6863670		2021-11-03	Baja_California	61	Male		GK	AY.103
	hCoV-19/Mexico/BCN_IBT_IMSS_4454/2021	EPI_ISL_6863671		2021-11-04	Baja_California	21	Male		GK	AY.20
	hCoV-19/Mexico/BCN_IBT_IMSS_4455/2021	EPI_ISL_6863672		2021-11-04	Baja_California	74	Male		GK	AY.100
	hCoV-19/Mexico/BCN_IBT_IMSS_4456/2021	EPI_ISL_6863673		2021-11-04	Baja_California	15	Male		GK	AY.20
	hCoV-19/Mexico/BCN_IBT_IMSS_4457/2021	EPI_ISL_6863674		2021-11-04	Baja_California	51	Female		GK	AY.113
	hCoV-19/Mexico/BCN_IBT_IMSS_4471/2021	EPI_ISL_6863690		2021-11-05	Baja_California	21	Female		GK	AY.113
	hCoV-19/Mexico/BCN_IBT_IMSS_4472/2021	EPI_ISL_6863691		2021-11-05	Baja_California	37	Female		GK	AY.3
	hCoV-19/Mexico/BCN_INER_IMSS_1767/2021	EPI_ISL_3557038		2021-07-27	Baja_California	28	Female		GK	AY.113
	hCoV-19/Mexico/BCN_INER_IMSS_1768/2021	EPI_ISL_3557039		2021-07-27	Baja_California	18	Female		GK	AY.26
	hCoV-19/Mexico/BCN_INER_IMSS_1769/2021	EPI_ISL_3557040		2021-07-27	Baja_California	48	Male		GK	AY.26
	hCoV-19/Mexico/BCN_INER_IMSS_1770/2021	EPI_ISL_3557041		2021-07-27	Baja_California	69	Female		GK	AY.25
	hCoV-19/Mexico/BCN_INER_IMSS_1774/2021	EPI_ISL_3557045		2021-07-25	Baja_California	64	Female		GK	AY.20
	hCoV-19/Mexico/BCN_INER_IMSS_2177/2021	EPI_ISL_4299600		2021-08-20	Baja_California	37	Female		GK	AY.20
	hCoV-19/Mexico/BCN_INER_IMSS_2216/2021	EPI_ISL_4299639		2021-08-23	Baja_California	25	Female		GK	AY.47
	hCoV-19/Mexico/BCN_INER_IMSS_2235/2021	EPI_ISL_4299658		2021-08-25	Baja_California	43	Female		GK	AY.13
	hCoV-19/Mexico/BCN_INER_IMSS_2530/2021	EPI_ISL_5194267		2021-09-19	Baja_California	18	Male		GK	AY.26
	hCoV-19/Mexico/BCN_INER_IMSS_2531/2021	EPI_ISL_5193930		2021-09-18	Baja_California	30	Female		GK	AY.26
	hCoV-19/Mexico/BCN_INER_IMSS_2532/2021	EPI_ISL_5194268		2021-09-18	Baja_California	60	Female		GK	AY.26
	hCoV-19/Mexico/BCN_INER_IMSS_2533/2021	EPI_ISL_5194269		2021-09-20	Baja_California	39	Female		GK	AY.20
	hCoV-19/Mexico/BCN_INER_IMSS_2535/2021	EPI_ISL_5194270		2021-09-20	Baja_California	56	Male		GK	AY.103
	hCoV-19/Mexico/BCN_INER_IMSS_2536/2021	EPI_ISL_5194271		2021-09-18	Baja_California	68	Male		GK	AY.26
	hCoV-19/Mexico/BCN_INER_IMSS_2537/2021	EPI_ISL_5194272		2021-09-18	Baja_California	44	Female		GK	AY.44
	hCoV-19/Mexico/BCN_INER_IMSS_2538/2021	EPI_ISL_5194273		2021-09-16	Baja_California	60	Male		GK	AY.113
	hCoV-19/Mexico/BCN_INER_IMSS_2539/2021	EPI_ISL_5194274		2021-09-17	Baja_California	66	Female		GK	AY.26
	hCoV-19/Mexico/BCN_INER_IMSS_2540/2021	EPI_ISL_5194275		2021-09-17	Baja_California	37	Female		GK	AY.26
	hCoV-19/Mexico/BCN_INER_IMSS_2541/2021	EPI_ISL_5194276		2021-09-17	Baja_California	35	Male		GK	AY.113
	hCoV-19/Mexico/BCN_INER_IMSS_2542/2021	EPI_ISL_5194277		2021-09-19	Baja_California	54	Female		GK	AY.20
	hCoV-19/Mexico/BCN_INER_IMSS_2543/2021	EPI_ISL_5194278		2021-09-19	Baja_California	59	Female		GK	AY.113
	hCoV-19/Mexico/BCN_INER_IMSS_2544/2021	EPI_ISL_5194279		2021-09-19	Baja_California	72	Female		GK	AY.113
	hCoV-19/Mexico/BCN_INER_IMSS_2545/2021	EPI_ISL_5194280		2021-09-19	Baja_California	42	Male		GK	AY.26
	hCoV-19/Mexico/BCN_INER_IMSS_2546/2021	EPI_ISL_5194281		2021-09-19	Baja_California	52	Female		GK	AY.113
	hCoV-19/Mexico/BCN_INER_IMSS_2547/2021	EPI_ISL_5194282		2021-09-20	Baja_California	28	Male		GK	B.1.617.2
	hCoV-19/Mexico/BCN_INER_IMSS_2548/2021	EPI_ISL_5194283		2021-09-20	Baja_California	64	Female		GK	AY.113
	hCoV-19/Mexico/BCN_INER_IMSS_2828/2021	EPI_ISL_6227260		2021-10-16	Baja_California	58	Male		GK	AY.26
	hCoV-19/Mexico/BCN_INER_IMSS_2829/2021	EPI_ISL_6227261		2021-10-16	Baja_California	50	Male		GK	AY.20
	hCoV-19/Mexico/BCN_INER_IMSS_2830/2021	EPI_ISL_6227262		2021-10-15	Baja_California	74	Female		GK	AY.26
	hCoV-19/Mexico/BCN_INER_IMSS_2831/2021	EPI_ISL_6227263		2021-10-15	Baja_California	75	Female		GK	AY.113
	hCoV-19/Mexico/BCN_INER_IMSS_2832/2021	EPI_ISL_6227264		2021-10-16	Baja_California	38	Male		GK	AY.113
	hCoV-19/Mexico/BCN_INER_IMSS_2833/2021	EPI_ISL_6227265		2021-10-15	Baja_California	65	Female		GK	AY.103
	hCoV-19/Mexico/BCN_INER_IMSS_2834/2021	EPI_ISL_6227266		2021-10-15	Baja_California	74	Male		GK	AY.20
	hCoV-19/Mexico/BCN_INER_IMSS_2835/2021	EPI_ISL_6227533		2021-10-15	Baja_California	48	Male		GK	B.1.617.2
	hCoV-19/Mexico/BCN_INER_IMSS_2836/2021	EPI_ISL_6227267		2021-10-15	Baja_California	79	Male		GK	AY.3
	hCoV-19/Mexico/BCN_INER_IMSS_2837/2021	EPI_ISL_6227186		2021-10-15	Baja_California	59	Female		GK	AY.122
	hCoV-19/Mexico/BCN_INER_IMSS_2838/2021	EPI_ISL_6227268		2021-10-15	Baja_California	43	Male		GK	AY.43
	hCoV-19/Mexico/BCN_INER_IMSS_2839/2021	EPI_ISL_6227269		2021-10-15	Baja_California	54	Female		GK	AY.122
	hCoV-19/Mexico/BCN_INER_IMSS_2840/2021	EPI_ISL_6227534		2021-10-16	Baja_California	92	Female		GK	B.1.617.2
	hCoV-19/Mexico/BCN_INER_IMSS_2841/2021	EPI_ISL_6227270		2021-10-17	Baja_California	41	Male		GK	AY.113
	hCoV-19/Mexico/BCN_INER_IMSS_2842/2021	EPI_ISL_6227271		2021-10-17	Baja_California	49	Male		GK	AY.20
	hCoV-19/Mexico/BCN_INER_IMSS_2843/2021	EPI_ISL_6227272		2021-10-17	Baja_California	37	Female		GK	AY.103
	hCoV-19/Mexico/BCN_INER_IMSS_2844/2021	EPI_ISL_6227580		2021-10-15	Baja_California	26	Female		GK	B.1.617.2
	hCoV-19/Mexico/BCN_INER_IMSS_2845/2021	EPI_ISL_6227273		2021-10-15	Baja_California	30	Male		GK	AY.26
	hCoV-19/Mexico/BCN_INER_IMSS_2851/2021	EPI_ISL_6227279		2021-10-16	Baja_California	52	Female		GK	AY.103
	hCoV-19/Mexico/BCN_INER_IMSS_2852/2021	EPI_ISL_6227280		2021-10-16	Baja_California	42	Female		GK	AY.103
	hCoV-19/Mexico/BCN_INER_IMSS_2853/2021	EPI_ISL_6227281		2021-10-15	Baja_California	93	Female		GK	AY.44
	hCoV-19/Mexico/BCN_INER_IMSS_2890/2021	EPI_ISL_6227317		2021-10-13	Baja_California	44	Male		GK	AY.103
	hCoV-19/Mexico/BCN_INER_IMSS_2891/2021	EPI_ISL_6227318		2021-10-13	Baja_California	43	Male		GK	AY.26
	hCoV-19/Mexico/BCN_INER_IMSS_2892/2021	EPI_ISL_6227319		2021-10-14	Baja_California	35	Male		GK	AY.44
	hCoV-19/Mexico/BCN_INER_IMSS_2904/2021	EPI_ISL_6227330		2021-10-18	Baja_California	32	Male		GK	AY.26
	hCoV-19/Mexico/BCN_INER_IMSS_2905/2021	EPI_ISL_6227331		2021-10-19	Baja_California	30	Male		GK	AY.113
	hCoV-19/Mexico/BCN_INER_IMSS_2906/2021	EPI_ISL_6227332		2021-10-19	Baja_California	61	Male		GK	AY.118
	hCoV-19/Mexico/BCN_INER_IMSS_2907/2021	EPI_ISL_6227333		2021-10-18	Baja_California	79	Male		GK	AY.113
	hCoV-19/Mexico/BCN_INER_IMSS_2908/2021	EPI_ISL_6227334		2021-10-18	Baja_California	94	Male		GK	AY.3
	hCoV-19/Mexico/BCN_INER_IMSS_2909/2021	EPI_ISL_6227529		2021-10-20	Baja_California	38	Female		GK	AY.113
	hCoV-19/Mexico/BCN_INER_IMSS_2910/2021	EPI_ISL_6227335		2021-10-19	Baja_California	24	Female		GK	AY.20
	hCoV-19/Mexico/BCN_INER_IMSS_2911/2021	EPI_ISL_6227336		2021-10-19	Baja_California	22	Male		GK	AY.20
	hCoV-19/Mexico/BCN_INER_IMSS_2912/2021	EPI_ISL_6227535		2021-10-20	Baja_California	57	Male		GK	B.1.617.2
	hCoV-19/Mexico/BCN_INER_IMSS_2913/2021	EPI_ISL_6227337		2021-10-20	Baja_California	28	Female		GK	AY.44
	hCoV-19/Mexico/BCN_LANGEBIO_IMSS_2107/2021	EPI_ISL_3805519		2021-08-04	Baja_California	28	Female		GK	AY.44
	hCoV-19/Mexico/BCN_LANGEBIO_IMSS_2108/2021	EPI_ISL_3805547		2021-08-04	Baja_California	35	Female		GK	AY.20
	hCoV-19/Mexico/BCN_LANGEBIO_IMSS_2109/2021	EPI_ISL_3805520		2021-08-04	Baja_California	28	Female		GK	AY.20
	hCoV-19/Mexico/BCN_LANGEBIO_IMSS_2129/2021	EPI_ISL_3805510		2021-08-02	Baja_California	26	Female		GK	AY.26
	hCoV-19/Mexico/BCN_LANGEBIO_IMSS_2147/2021	EPI_ISL_3805596		2021-08-05	Baja_California	57	Male		GK	AY.20
	hCoV-19/Mexico/BCN_LANGEBIO_IMSS_2157/2021	EPI_ISL_3805700		2021-08-05	Baja_California	24	Female		GK	AY.26
	hCoV-19/Mexico/BCN_LANGEBIO_IMSS_2158/2021	EPI_ISL_3805530		2021-08-05	Baja_California	30	Female		GK	AY.26
	hCoV-19/Mexico/BCN_LANGEBIO_IMSS_2351/2021	EPI_ISL_4549815		2021-08-26	Baja_California	30	Female		GK	AY.100
	hCoV-19/Mexico/BCN_LANGEBIO_IMSS_2364/2021	EPI_ISL_4549816		2021-08-27	Baja_California	33	Male		GK	AY.3
	hCoV-19/Mexico/BCN_LANGEBIO_IMSS_2366/2021	EPI_ISL_4549817		2021-08-27	Baja_California	32	Female		GK	AY.113
	hCoV-19/Mexico/BCN_LANGEBIO_IMSS_2367/2021	EPI_ISL_4549818		2021-08-30	Baja_California	57	Male		GK	AY.26
	hCoV-19/Mexico/BCN_LANGEBIO_IMSS_2368/2021	EPI_ISL_4549819		2021-08-27	Baja_California	22	Female		GK	AY.100
	hCoV-19/Mexico/BCN_LANGEBIO_IMSS_2369/2021	EPI_ISL_4549820		2021-08-27	Baja_California	46	Female		GK	AY.26
	hCoV-19/Mexico/BCN_LANGEBIO_IMSS_2370/2021	EPI_ISL_4549821		2021-08-27	Baja_California	79	Male		GK	AY.100
	hCoV-19/Mexico/BCN_LANGEBIO_IMSS_2397/2021	EPI_ISL_4549822		2021-08-31	Baja_California	22	Female		GK	AY.26
	hCoV-19/Mexico/BCN_LANGEBIO_IMSS_2398/2021	EPI_ISL_4549823		2021-08-30	Baja_California	30	Female		GK	AY.26
	hCoV-19/Mexico/BCN_LANGEBIO_IMSS_2399/2021	EPI_ISL_4549824		2021-08-30	Baja_California	30	Male		GK	AY.3
	hCoV-19/Mexico/BCN_LANGEBIO_IMSS_2400/2021	EPI_ISL_4549825		2021-08-30	Baja_California	26	Female		GK	AY.26
	hCoV-19/Mexico/BCN_LANGEBIO_IMSS_2401/2021	EPI_ISL_4549826		2021-08-31	Baja_California	25	Female		GK	AY.20
	hCoV-19/Mexico/BCN_LANGEBIO_IMSS_2402/2021	EPI_ISL_4549827		2021-08-31	Baja_California	40	Male		GK	AY.100
	hCoV-19/Mexico/BCN_LANGEBIO_IMSS_2403/2021	EPI_ISL_4549828		2021-08-31	Baja_California	36	Female		GK	AY.113
	hCoV-19/Mexico/BCN_LANGEBIO_IMSS_2404/2021	EPI_ISL_4549829		2021-08-30	Baja_California	24	Female		GK	AY.20
	hCoV-19/Mexico/BCN_LANGEBIO_IMSS_2405/2021	EPI_ISL_4549830		2021-08-30	Baja_California	24	Female		GK	AY.3
	hCoV-19/Mexico/BCN_LANGEBIO_IMSS_2406/2021	EPI_ISL_4549831		2021-08-31	Baja_California	34	Female		GK	AY.20
	hCoV-19/Mexico/BCN_LANGEBIO_IMSS_2867/2021	EPI_ISL_5850891		2021-09-27	Baja_California	24	Female		GK	AY.20
	hCoV-19/Mexico/BCN_LANGEBIO_IMSS_2868/2021	EPI_ISL_5850892		2021-09-27	Baja_California	66	Female		GK	AY.113
	hCoV-19/Mexico/BCN_LANGEBIO_IMSS_2869/2021	EPI_ISL_5850893		2021-09-24	Baja_California	38	Male		GK	AY.20
	hCoV-19/Mexico/BCN_LANGEBIO_IMSS_2870/2021	EPI_ISL_5850894		2021-09-24	Baja_California	38	Male		GK	AY.113
	hCoV-19/Mexico/BCN_LANGEBIO_IMSS_2871/2021	EPI_ISL_5850895		2021-09-24	Baja_California	75	Female		GK	AY.122
	hCoV-19/Mexico/BCN_LANGEBIO_IMSS_2872/2021	EPI_ISL_5850896		2021-09-24	Baja_California	64	Male		GK	AY.113
	hCoV-19/Mexico/BCN_LANGEBIO_IMSS_2873/2021	EPI_ISL_5850897		2021-09-25	Baja_California	39	Male		GK	AY.26
	hCoV-19/Mexico/BCN_LANGEBIO_IMSS_2874/2021	EPI_ISL_5850898		2021-09-25	Baja_California	60	Female		GK	AY.26
	hCoV-19/Mexico/BCN_LANGEBIO_IMSS_2875/2021	EPI_ISL_5850899		2021-09-25	Baja_California	54	Female		GK	AY.103
	hCoV-19/Mexico/BCN_LANGEBIO_IMSS_2876/2021	EPI_ISL_5850900		2021-09-26	Baja_California	58	Female		GK	AY.113
	hCoV-19/Mexico/BCN_LANGEBIO_IMSS_2877/2021	EPI_ISL_5850901		2021-09-26	Baja_California	35	Male		GK	AY.113
	hCoV-19/Mexico/BCN_LANGEBIO_IMSS_2878/2021	EPI_ISL_5850902		2021-09-27	Baja_California	57	Female		GK	AY.20
	hCoV-19/Mexico/BCN_LANGEBIO_IMSS_2879/2021	EPI_ISL_5850903		2021-09-27	Baja_California	29	Male		GK	AY.113
	hCoV-19/Mexico/BCN_LANGEBIO_IMSS_2894/2021	EPI_ISL_5850918		2021-09-27	Baja_California	59	Male		GK	AY.122
	hCoV-19/Mexico/BCN_LANGEBIO_IMSS_2895/2021	EPI_ISL_5850919		2021-09-27	Baja_California	29	Female		GK	AY.26
	hCoV-19/Mexico/BCN_LANGEBIO_IMSS_2896/2021	EPI_ISL_5850920		2021-09-28	Baja_California	53	Female		GK	AY.113
	hCoV-19/Mexico/BCN_LANGEBIO_IMSS_2897/2021	EPI_ISL_5850921		2021-09-27	Baja_California	37	Male		GK	AY.26
	hCoV-19/Mexico/BCN_LANGEBIO_IMSS_2898/2021	EPI_ISL_5850922		2021-09-27	Baja_California	39	Female		GK	AY.103
	hCoV-19/Mexico/BCN_LANGEBIO_IMSS_3253/2021	EPI_ISL_6775762		2021-10-20	Baja_California	31	Male		GK	B.1.617.2
	hCoV-19/Mexico/BCN_LANGEBIO_IMSS_3265/2021	EPI_ISL_6775818		2021-10-21	Baja_California	28	Female		GK	AY.113
	hCoV-19/Mexico/BCN_LANGEBIO_IMSS_3266/2021	EPI_ISL_6775763		2021-10-21	Baja_California	82	Female		GK	AY.100
	hCoV-19/Mexico/BCN_LANGEBIO_IMSS_3267/2021	EPI_ISL_6775766		2021-10-21	Baja_California	28	Female		GK	AY.20
	hCoV-19/Mexico/BCN_LANGEBIO_IMSS_3268/2021	EPI_ISL_6775767		2021-10-19	Baja_California	43	Female		GK	AY.100
	hCoV-19/Mexico/BCN_LANGEBIO_IMSS_3269/2021	EPI_ISL_6775768		2021-10-24	Baja_California	45	Female		GK	AY.20
	hCoV-19/Mexico/BCN_LANGEBIO_IMSS_3270/2021	EPI_ISL_6775769		2021-10-24	Baja_California	56	Female		GK	AY.103
	hCoV-19/Mexico/BCN_LANGEBIO_IMSS_3271/2021	EPI_ISL_6775770		2021-10-24	Baja_California	68	Male		GK	AY.113
	hCoV-19/Mexico/BCN_LANGEBIO_IMSS_3272/2021	EPI_ISL_6775771		2021-10-23	Baja_California	34	Female		GK	AY.26
	hCoV-19/Mexico/BCN_LANGEBIO_IMSS_3273/2021	EPI_ISL_6775772		2021-10-23	Baja_California	65	Male		GK	AY.103
	hCoV-19/Mexico/BCN_LANGEBIO_IMSS_3274/2021	EPI_ISL_6775773		2021-10-23	Baja_California	52	Male		GK	AY.103
	hCoV-19/Mexico/BCN_LANGEBIO_IMSS_3275/2021	EPI_ISL_6775774		2021-10-23	Baja_California	26	Male		GK	AY.3
	hCoV-19/Mexico/BCN_LANGEBIO_IMSS_3276/2021	EPI_ISL_6775775		2021-10-23	Baja_California	40	Female		GK	AY.103
	hCoV-19/Mexico/BCN_LANGEBIO_IMSS_3277/2021	EPI_ISL_6775776		2021-10-23	Baja_California	32	Female		GK	AY.113
	hCoV-19/Mexico/BCN_LANGEBIO_IMSS_3278/2021	EPI_ISL_6775777		2021-10-23	Baja_California	44	Male		GK	AY.103
	hCoV-19/Mexico/BCN_LANGEBIO_IMSS_3279/2021	EPI_ISL_6775778		2021-10-22	Baja_California	40	Female		GK	AY.3
	hCoV-19/Mexico/BCN_LANGEBIO_IMSS_3280/2021	EPI_ISL_6775779		2021-10-21	Baja_California	27	Female		GK	AY.26
	hCoV-19/Mexico/BCN_LANGEBIO_IMSS_3281/2021	EPI_ISL_6775780		2021-10-21	Baja_California	36	Female		GK	AY.20
	hCoV-19/Mexico/BCN_LANGEBIO_IMSS_3282/2021	EPI_ISL_6775781		2021-10-22	Baja_California	22	Male		GK	AY.103
	hCoV-19/Mexico/BCN_LANGEBIO_IMSS_3284/2021	EPI_ISL_6775782		2021-10-22	Baja_California	45	Female		GK	AY.20
	hCoV-19/Mexico/BCN-INER_IMSS_1595/2021	EPI_ISL_3155605		2021-07-06	Baja_California	24	Male		GK	AY.20
	hCoV-19/Mexico/BCN-LANGEBIO_IMSS_1625/2021	EPI_ISL_2942729		2021-06-30	Baja_California	48	Male		GK	AY.26
	hCoV-19/Mexico/BCS_IBT_IMSS_13668-NC/2021	EPI_ISL_2681371		2021-05-26	Baja_California_Sur	47	Female		GK	AY.26
	hCoV-19/Mexico/BCS_IBT_IMSS_1573/2021	EPI_ISL_2681214		2021-05-25	Baja_California_Sur	42	Male		GK	AY.26
	hCoV-19/Mexico/BCS_IBT_IMSS_1578/2021	EPI_ISL_2681064		2021-05-26	Baja_California_Sur	40	Female		GK	AY.26
	hCoV-19/Mexico/BCS_IBT_IMSS_1579/2021	EPI_ISL_2681059		2021-05-26	Baja_California_Sur	27	Male		GK	AY.26
	hCoV-19/Mexico/BCS_IBT_IMSS_1581/2021	EPI_ISL_2681155		2021-05-26	Baja_California_Sur	24	Female		GK	AY.26
	hCoV-19/Mexico/BCS_IBT_IMSS_1583/2021	EPI_ISL_2681188		2021-05-27	Baja_California_Sur	57	Female		GK	AY.26
	hCoV-19/Mexico/BCS_IBT_IMSS_1584/2021	EPI_ISL_2681156		2021-05-27	Baja_California_Sur	50	Male		GK	AY.26
	hCoV-19/Mexico/BCS_IBT_IMSS_1585/2021	EPI_ISL_2681065		2021-05-27	Baja_California_Sur	56	Male		GK	AY.26
	hCoV-19/Mexico/BCS_IBT_IMSS_1655/2021	EPI_ISL_2681251		2021-06-01	Baja_California_Sur	33	Female		GK	AY.26
	hCoV-19/Mexico/BCS_IBT_IMSS_1656/2021	EPI_ISL_2681193		2021-05-31	Baja_California_Sur	24	Male		GK	AY.26
	hCoV-19/Mexico/BCS_IBT_IMSS_1657/2021	EPI_ISL_2681196		2021-05-31	Baja_California_Sur	54	Female		GK	AY.26
	hCoV-19/Mexico/BCS_IBT_IMSS_1658/2021	EPI_ISL_2681229		2021-05-28	Baja_California_Sur	42	Male		GK	AY.26
	hCoV-19/Mexico/BCS_IBT_IMSS_1674/2021	EPI_ISL_2681205		2021-06-01	Baja_California_Sur	30	Female		GK	AY.26
	hCoV-19/Mexico/BCS_IBT_IMSS_1689/2021	EPI_ISL_2681140		2021-06-02	Baja_California_Sur	27	Female		GK	AY.26
	hCoV-19/Mexico/BCS_IBT_IMSS_1695/2021	EPI_ISL_2681113		2021-06-02	Baja_California_Sur	34	Female		GK	AY.26
	hCoV-19/Mexico/BCS_IBT_IMSS_1696/2021	EPI_ISL_2681181		2021-06-02	Baja_California_Sur	30	Male		GK	AY.26
	hCoV-19/Mexico/BCS_IBT_IMSS_1697/2021	EPI_ISL_2681231		2021-06-02	Baja_California_Sur	54	Female		GK	AY.26
	hCoV-19/Mexico/BCS_IBT_IMSS_1698/2021	EPI_ISL_2681071		2021-06-02	Baja_California_Sur	42	Male		GK	AY.26
	hCoV-19/Mexico/BCS_IBT_IMSS_1699/2021	EPI_ISL_2681151		2021-06-02	Baja_California_Sur	21	Male		GK	AY.26
	hCoV-19/Mexico/BCS_IBT_IMSS_1700/2021	EPI_ISL_2681267		2021-06-02	Baja_California_Sur	11	Female		GK	AY.26
	hCoV-19/Mexico/BCS_IBT_IMSS_1701/2021	EPI_ISL_2681266		2021-06-02	Baja_California_Sur	14	Female		GK	AY.26
	hCoV-19/Mexico/BCS_IBT_IMSS_1702/2021	EPI_ISL_2681175		2021-06-02	Baja_California_Sur	22	Female		GK	AY.26
	hCoV-19/Mexico/BCS_IBT_IMSS_1703/2021	EPI_ISL_2681306		2021-06-02	Baja_California_Sur	43	Female		GK	AY.26
	hCoV-19/Mexico/BCS_IBT_IMSS_1957/2021	EPI_ISL_3133778		2021-06-02	Baja_California_Sur	38	Male		GK	AY.26
	hCoV-19/Mexico/BCS_IBT_IMSS_2414/2021	EPI_ISL_3347713		2021-07-16	Baja_California_Sur	51	Male		GK	AY.26
	hCoV-19/Mexico/BCS_IBT_IMSS_2415/2021	EPI_ISL_3347714		2021-07-16	Baja_California_Sur	32	Female		GK	AY.26
	hCoV-19/Mexico/BCS_IBT_IMSS_2487/2021	EPI_ISL_3347772		2021-07-20	Baja_California_Sur	25	Female		GK	AY.26
	hCoV-19/Mexico/BCS_IBT_IMSS_2488/2021	EPI_ISL_3347567		2021-07-19	Baja_California_Sur	32	Male		GK	AY.26
	hCoV-19/Mexico/BCS_IBT_IMSS_2489/2021	EPI_ISL_3347773		2021-07-19	Baja_California_Sur	42	Male		GK	AY.26
	hCoV-19/Mexico/BCS_IBT_IMSS_2490/2021	EPI_ISL_3347774		2021-07-19	Baja_California_Sur	37	Male		GK	AY.26
	hCoV-19/Mexico/BCS_IBT_IMSS_2491/2021	EPI_ISL_3347922		2021-07-19	Baja_California_Sur	26	Male		GK	AY.26
	hCoV-19/Mexico/BCS_IBT_IMSS_2492/2021	EPI_ISL_3347923		2021-07-21	Baja_California_Sur	34	Female		GK	AY.26
	hCoV-19/Mexico/BCS_IBT_IMSS_2493/2021	EPI_ISL_3347775		2021-07-19	Baja_California_Sur	26	Male		GK	AY.26
	hCoV-19/Mexico/BCS_IBT_IMSS_2494/2021	EPI_ISL_3347776		2021-07-19	Baja_California_Sur	24	Female		GK	AY.26
	hCoV-19/Mexico/BCS_IBT_IMSS_2938/2021	EPI_ISL_4006457		2021-08-17	Baja_California_Sur	20	Male		GK	AY.14
	hCoV-19/Mexico/BCS_IBT_IMSS_2939/2021	EPI_ISL_4006458		2021-08-17	Baja_California_Sur	45	Female		GK	AY.20
	hCoV-19/Mexico/BCS_IBT_IMSS_2940/2021	EPI_ISL_4006459		2021-08-17	Baja_California_Sur	36	Female		GK	AY.20
	hCoV-19/Mexico/BCS_IBT_IMSS_2941/2021	EPI_ISL_4006460		2021-08-17	Baja_California_Sur	29	Female		GK	AY.20
	hCoV-19/Mexico/BCS_IBT_IMSS_2942/2021	EPI_ISL_4006461		2021-08-14	Baja_California_Sur	87	Male		GK	AY.20
	hCoV-19/Mexico/BCS_IBT_IMSS_2943/2021	EPI_ISL_4006462		2021-08-15	Baja_California_Sur	24	Female		GK	AY.113
	hCoV-19/Mexico/BCS_IBT_IMSS_2944/2021	EPI_ISL_4006463		2021-08-13	Baja_California_Sur	46	Male		GK	AY.26
	hCoV-19/Mexico/BCS_IBT_IMSS_2945/2021	EPI_ISL_4006464		2021-08-12	Baja_California_Sur	75	Female		GK	AY.20
	hCoV-19/Mexico/BCS_IBT_IMSS_2946/2021	EPI_ISL_4006465		2021-07-22	Baja_California_Sur	39	Female		GK	AY.26
	hCoV-19/Mexico/BCS_IBT_IMSS_2997/2021	EPI_ISL_4006516		2021-08-17	Baja_California_Sur	67	Male		GK	AY.26
	hCoV-19/Mexico/BCS_IBT_IMSS_3395/2021	EPI_ISL_4878724		2021-09-07	Baja_California_Sur	46	Male		GK	AY.26
	hCoV-19/Mexico/BCS_IBT_IMSS_3396/2021	EPI_ISL_4878725		2021-09-08	Baja_California_Sur	72	Male		GK	AY.26
	hCoV-19/Mexico/BCS_IBT_IMSS_3448/2021	EPI_ISL_4878771		2021-09-09	Baja_California_Sur	82	Male		GK	AY.26
	hCoV-19/Mexico/BCS_IBT_IMSS_3449/2021	EPI_ISL_4878996		2021-09-09	Baja_California_Sur	86	Male		GK	AY.26
	hCoV-19/Mexico/BCS_IBT_IMSS_3450/2021	EPI_ISL_4878772		2021-09-08	Baja_California_Sur	58	Male		GK	AY.26
	hCoV-19/Mexico/BCS_IBT_IMSS_3833/2021	EPI_ISL_5936997		2021-10-05	Baja_California_Sur	27	Male		GK	AY.3
	hCoV-19/Mexico/BCS_IBT_IMSS_3863/2021	EPI_ISL_5936998		2021-10-06	Baja_California_Sur	76	Male		GK	AY.25
	hCoV-19/Mexico/BCS_IBT_IMSS_3872/2021	EPI_ISL_5936999		2021-10-08	Baja_California_Sur	72	Female		GK	AY.26
	hCoV-19/Mexico/BCS_IBT_IMSS_3873/2021	EPI_ISL_5937000		2021-10-06	Baja_California_Sur	0	Female		GK	AY.26
	hCoV-19/Mexico/BCS_IBT_IMSS_3874/2021	EPI_ISL_5937001		2021-10-05	Baja_California_Sur	35	Male		GK	AY.113
	hCoV-19/Mexico/BCS_IBT_IMSS_3875/2021	EPI_ISL_5937002		2021-10-05	Baja_California_Sur	31	Male		GK	AY.26
	hCoV-19/Mexico/BCS_IBT_IMSS_3876/2021	EPI_ISL_5937003		2021-10-06	Baja_California_Sur	29	Male		GK	AY.26
	hCoV-19/Mexico/BCS_IBT_IMSS_3877/2021	EPI_ISL_5936705		2021-10-07	Baja_California_Sur	26	Female		GK	AY.26
	hCoV-19/Mexico/BCS_IBT_IMSS_3994/2021	EPI_ISL_5936693		2021-10-08	Baja_California_Sur	73	Male		GK	AY.20
	hCoV-19/Mexico/BCS_IBT_IMSS_4297/2021	EPI_ISL_6863509		2021-11-02	Baja_California_Sur	69	Male		GK	AY.20
	hCoV-19/Mexico/BCS_IBT_IMSS_4298/2021	EPI_ISL_6863510		2021-11-03	Baja_California_Sur	70	Male		GK	AY.26
	hCoV-19/Mexico/BCS_IBT_IMSS_4460/2021	EPI_ISL_6863677		2021-11-08	Baja_California_Sur	48	Female		GK	AY.20
	hCoV-19/Mexico/BCS_IBT_IMSS_4467/2021	EPI_ISL_6863686		2021-11-07	Baja_California_Sur	71	Female		GK	AY.26
	hCoV-19/Mexico/BCS_INER_IMSS_1740/2021	EPI_ISL_3557011		2021-07-23	Baja_California_Sur	25	Male		GK	AY.26
	hCoV-19/Mexico/BCS_INER_IMSS_1741/2021	EPI_ISL_3557012		2021-07-23	Baja_California_Sur	26	Female		GK	AY.26
	hCoV-19/Mexico/BCS_INER_IMSS_1742/2021	EPI_ISL_3557013		2021-07-24	Baja_California_Sur	23	Male		GK	AY.26
	hCoV-19/Mexico/BCS_INER_IMSS_1822/2021	EPI_ISL_3557093		2021-07-27	Baja_California_Sur	34	Male		GK	AY.26
	hCoV-19/Mexico/BCS_INER_IMSS_1823/2021	EPI_ISL_3557094		2021-07-29	Baja_California_Sur	62	Male		GK	AY.26
	hCoV-19/Mexico/BCS_INER_IMSS_1824/2021	EPI_ISL_3557095		2021-07-29	Baja_California_Sur	43	Male		GK	AY.26
	hCoV-19/Mexico/BCS_INER_IMSS_1825/2021	EPI_ISL_3557096		2021-07-29	Baja_California_Sur	37	Male		GK	AY.26
	hCoV-19/Mexico/BCS_INER_IMSS_1894/2021	EPI_ISL_3557165		2021-07-30	Baja_California_Sur	58	Female		GK	AY.26
	hCoV-19/Mexico/BCS_INER_IMSS_1895/2021	EPI_ISL_3557166		2021-07-30	Baja_California_Sur	56	Male		GK	AY.26
	hCoV-19/Mexico/BCS_INER_IMSS_1896/2021	EPI_ISL_3557167		2021-07-29	Baja_California_Sur	61	Female		GK	AY.26
	hCoV-19/Mexico/BCS_INER_IMSS_1897/2021	EPI_ISL_3557168		2021-07-30	Baja_California_Sur	62	Male		GK	AY.26
	hCoV-19/Mexico/BCS_INER_IMSS_2171/2021	EPI_ISL_4299594		2021-08-21	Baja_California_Sur	31	Female		GK	AY.26
	hCoV-19/Mexico/BCS_INER_IMSS_2579/2021	EPI_ISL_5193944		2021-09-20	Baja_California_Sur	23	Female		GK	AY.26
	hCoV-19/Mexico/BCS_INER_IMSS_2846/2021	EPI_ISL_6227274		2021-10-13	Baja_California_Sur	59	Male		GK	AY.26
	hCoV-19/Mexico/BCS_INER_IMSS_2847/2021	EPI_ISL_6227275		2021-10-15	Baja_California_Sur	32	Male		GK	AY.26
	hCoV-19/Mexico/BCS_INER_IMSS_2903/2021	EPI_ISL_6227329		2021-10-20	Baja_California_Sur	31	Female		GK	AY.26
	hCoV-19/Mexico/BCS_INER_IMSS_2927/2021	EPI_ISL_6227575		2021-10-19	Baja_California_Sur	28	Male		GK	AY.103
	hCoV-19/Mexico/BCS_INER_IMSS_2928/2021	EPI_ISL_6227350		2021-10-19	Baja_California_Sur	79	Male		GK	AY.113
	hCoV-19/Mexico/BCS_LANGEBIO_IMSS_2119/2021	EPI_ISL_3805500		2021-08-02	Baja_California_Sur	23	Female		GK	AY.26
	hCoV-19/Mexico/BCS_LANGEBIO_IMSS_2120/2021	EPI_ISL_3805581		2021-08-02	Baja_California_Sur	48	Male		GK	AY.26
	hCoV-19/Mexico/BCS_LANGEBIO_IMSS_2121/2021	EPI_ISL_3805569		2021-08-02	Baja_California_Sur	44	Male		GK	AY.26
	hCoV-19/Mexico/BCS_LANGEBIO_IMSS_2124/2021	EPI_ISL_3805575		2021-08-02	Baja_California_Sur	47	Male		GK	AY.26
	hCoV-19/Mexico/BCS_LANGEBIO_IMSS_2125/2021	EPI_ISL_3805576		2021-08-02	Baja_California_Sur	47	Male		GK	AY.26
	hCoV-19/Mexico/BCS_LANGEBIO_IMSS_2126/2021	EPI_ISL_3805521		2021-08-02	Baja_California_Sur	28	Male		GK	AY.26
	hCoV-19/Mexico/BCS_LANGEBIO_IMSS_2127/2021	EPI_ISL_3805552		2021-08-02	Baja_California_Sur	37	Male		GK	AY.3
	hCoV-19/Mexico/BCS_LANGEBIO_IMSS_2128/2021	EPI_ISL_4395431		2021-08-02	Baja_California_Sur	35	Male		GK	AY.3
	hCoV-19/Mexico/BCS_LANGEBIO_IMSS_2149/2021	EPI_ISL_3805504		2021-08-05	Baja_California_Sur	24	Female		GK	AY.20
	hCoV-19/Mexico/BCS_LANGEBIO_IMSS_2150/2021	EPI_ISL_3805601		2021-08-05	Baja_California_Sur	59	Female		GK	AY.26
	hCoV-19/Mexico/BCS_LANGEBIO_IMSS_2357/2021	EPI_ISL_4549832		2021-08-26	Baja_California_Sur	48	Male		GK	AY.26
	hCoV-19/Mexico/BCS_LANGEBIO_IMSS_2408/2021	EPI_ISL_4549833		2021-08-30	Baja_California_Sur	41	Male		GK	AY.100
	hCoV-19/Mexico/BCS_LANGEBIO_IMSS_2838/2021	EPI_ISL_5850858		2021-09-27	Baja_California_Sur	38	Female		GK	AY.20
	hCoV-19/Mexico/BCS_LANGEBIO_IMSS_2841/2021	EPI_ISL_5850865		2021-09-26	Baja_California_Sur	50	Female		GK	AY.26
	hCoV-19/Mexico/BCS_LANGEBIO_IMSS_3288/2021	EPI_ISL_6775759		2021-10-25	Baja_California_Sur	63	Male		GK	AY.20
	hCoV-19/Mexico/BCS_LANGEBIO_IMSS_3289/2021	EPI_ISL_6775760		2021-10-19	Baja_California_Sur	36	Female		GK	AY.26
	hCoV-19/Mexico/BCS_LANGEBIO_IMSS_3290/2021	EPI_ISL_6775761		2021-10-22	Baja_California_Sur	73	Female		GK	AY.3
	hCoV-19/Mexico/BCS-IBT_IMSS_14958-NC/2021	EPI_ISL_2801757		2021-05-29	Baja_California_Sur	44	Female		GK	AY.26
	hCoV-19/Mexico/BCS-IBT_IMSS_15290-NC/2021	EPI_ISL_2801773		2021-05-31	Baja_California_Sur	29	Male		GK	AY.26
	hCoV-19/Mexico/BCS-IBT_IMSS_1941/2021	EPI_ISL_2801804		2021-06-02	Baja_California_Sur	58	Female		GK	AY.26
	hCoV-19/Mexico/BCS-IBT_IMSS_1948/2021	EPI_ISL_2801809		2021-06-02	Baja_California_Sur	22	Male		GK	AY.26
	hCoV-19/Mexico/BCS-IBT_IMSS_1949/2021	EPI_ISL_2801810		2021-06-02	Baja_California_Sur	29	Female		GK	AY.26
	hCoV-19/Mexico/BCS-IBT_IMSS_1950/2021	EPI_ISL_2801811		2021-06-02	Baja_California_Sur	22	Male		GK	AY.26
	hCoV-19/Mexico/BCS-IBT_IMSS_1952/2021	EPI_ISL_2801813		2021-06-02	Baja_California_Sur	25	Female		GK	AY.26
	hCoV-19/Mexico/BCS-IBT_IMSS_1953/2021	EPI_ISL_2801814		2021-06-02	Baja_California_Sur	23	Male		GK	AY.26
	hCoV-19/Mexico/BCS-IBT_IMSS_1954/2021	EPI_ISL_2801815		2021-06-02	Baja_California_Sur	30	Male		GK	AY.26
	hCoV-19/Mexico/BCS-IBT_IMSS_1955/2021	EPI_ISL_2801816		2021-06-02	Baja_California_Sur	47	Female		GK	AY.26
	hCoV-19/Mexico/BCS-IBT_IMSS_1959/2021	EPI_ISL_2801818		2021-06-02	Baja_California_Sur	39	Female		GK	AY.26
	hCoV-19/Mexico/BCS-IBT_IMSS_1960/2021	EPI_ISL_2801819		2021-06-02	Baja_California_Sur	47	Female		GK	AY.26
	hCoV-19/Mexico/BCS-IBT_IMSS_1961/2021	EPI_ISL_2801820		2021-06-01	Baja_California_Sur	43	Male		GK	AY.26
	hCoV-19/Mexico/BCS-IBT_IMSS_1962/2021	EPI_ISL_2801821		2021-06-02	Baja_California_Sur	32	Female		GK	AY.26
	hCoV-19/Mexico/BCS-IBT_IMSS_1963/2021	EPI_ISL_2801822		2021-06-02	Baja_California_Sur	39	Male		GK	AY.26
	hCoV-19/Mexico/BCS-IBT_IMSS_1964/2021	EPI_ISL_2801823		2021-06-02	Baja_California_Sur	39	Female		GK	AY.26
	hCoV-19/Mexico/BCS-IBT_IMSS_1967/2021	EPI_ISL_2801826		2021-06-02	Baja_California_Sur	20	Female		GK	AY.26
	hCoV-19/Mexico/BCS-IBT_IMSS_1971/2021	EPI_ISL_2801829		2021-06-02	Baja_California_Sur	19	Male		GK	AY.26
	hCoV-19/Mexico/BCS-IBT_IMSS_1972/2021	EPI_ISL_2801830		2021-06-04	Baja_California_Sur	44	Male		GK	AY.26
	hCoV-19/Mexico/BCS-INER_IMSS_1494/2021	EPI_ISL_3155504		2021-06-28	Baja_California_Sur	68	Male		GK	AY.26
	hCoV-19/Mexico/BCS-INER_IMSS_1495/2021	EPI_ISL_3155505		2021-06-28	Baja_California_Sur	48	Female		GK	AY.26
	hCoV-19/Mexico/BCS-INER_IMSS_1510/2021	EPI_ISL_3155520		2021-06-28	Baja_California_Sur	26	Male		GK	AY.26
	hCoV-19/Mexico/BCS-INER_IMSS_1511/2021	EPI_ISL_3155521		2021-06-29	Baja_California_Sur	28	Male		GK	AY.26
	hCoV-19/Mexico/BCS-INER_IMSS_1512/2021	EPI_ISL_3155522		2021-06-29	Baja_California_Sur	41	Male		GK	AY.26
	hCoV-19/Mexico/BCS-INER_IMSS_1513/2021	EPI_ISL_3155523		2021-06-28	Baja_California_Sur	29	Male		GK	AY.26
	hCoV-19/Mexico/BCS-INER_IMSS_1514/2021	EPI_ISL_3155524		2021-06-28	Baja_California_Sur	30	Male		GK	AY.26
	hCoV-19/Mexico/BCS-INER_IMSS_1515/2021	EPI_ISL_3155525		2021-06-25	Baja_California_Sur	23	Male		GK	AY.26
	hCoV-19/Mexico/BCS-INER_IMSS_1516/2021	EPI_ISL_3155526		2021-06-30	Baja_California_Sur	32	Male		GK	AY.26
	hCoV-19/Mexico/BCS-INER_IMSS_1522/2021	EPI_ISL_3155532		2021-06-29	Baja_California_Sur	34	Male		GK	AY.26
	hCoV-19/Mexico/BCS-INER_IMSS_1523/2021	EPI_ISL_3155533		2021-06-30	Baja_California_Sur	74	Female		GK	AY.26
	hCoV-19/Mexico/BCS-INER_IMSS_1524/2021	EPI_ISL_3155534		2021-06-29	Baja_California_Sur	48	Male		GK	AY.26
	hCoV-19/Mexico/BCS-INER_IMSS_1525/2021	EPI_ISL_3155535		2021-06-29	Baja_California_Sur	45	Female		GK	AY.26
	hCoV-19/Mexico/BCS-INER_IMSS_1526/2021	EPI_ISL_3155536		2021-06-28	Baja_California_Sur	62	Female		GK	AY.26
	hCoV-19/Mexico/BCS-INER_IMSS_1567/2021	EPI_ISL_3155577		2021-07-06	Baja_California_Sur	68	Male		GK	AY.26
	hCoV-19/Mexico/BCS-INER_IMSS_1582/2021	EPI_ISL_3155592		2021-07-05	Baja_California_Sur	66	Female		GK	AY.26
	hCoV-19/Mexico/BCS-INER_IMSS_1583/2021	EPI_ISL_3155593		2021-07-05	Baja_California_Sur	49	Male		GK	AY.26
	hCoV-19/Mexico/BCS-INER_IMSS_1584/2021	EPI_ISL_3155594		2021-07-05	Baja_California_Sur	44	Male		GK	AY.26
	hCoV-19/Mexico/BCS-INER_IMSS_1585/2021	EPI_ISL_3155595		2021-07-05	Baja_California_Sur	43	Female		GK	AY.26
	hCoV-19/Mexico/BCS-INER_IMSS_1586/2021	EPI_ISL_3155596		2021-07-05	Baja_California_Sur	49	Female		GK	AY.26
	hCoV-19/Mexico/BCS-INER_IMSS_1587/2021	EPI_ISL_3155597		2021-07-05	Baja_California_Sur	25	Female		GK	AY.26
	hCoV-19/Mexico/BCS-INER_IMSS_1588/2021	EPI_ISL_3155598		2021-07-05	Baja_California_Sur	50	Male		GK	AY.26
	hCoV-19/Mexico/BCS-INER_IMSS_1589/2021	EPI_ISL_3155599		2021-07-05	Baja_California_Sur	39	Female		GK	AY.26
	hCoV-19/Mexico/BCS-INER_IMSS_1590/2021	EPI_ISL_3155600		2021-07-05	Baja_California_Sur	19	Male		GK	AY.26
	hCoV-19/Mexico/BCS-INER_IMSS_1591/2021	EPI_ISL_3155601		2021-07-05	Baja_California_Sur	37	Female		GK	AY.26
	hCoV-19/Mexico/BCS-INER_IMSS_1643/2021	EPI_ISL_3155653		2021-07-10	Baja_California_Sur	87	Female		GK	AY.26
	hCoV-19/Mexico/BCS-INER_IMSS_1644/2021	EPI_ISL_3155654		2021-07-09	Baja_California_Sur	37	Male		GK	AY.26
	hCoV-19/Mexico/BCS-LANGEBIO_IMSS_1029/2021	EPI_ISL_2671484		2021-05-25	Baja_California_Sur	47	Female		GK	AY.26
	hCoV-19/Mexico/BCS-LANGEBIO_IMSS_1084/2021	EPI_ISL_2671488		2021-05-15	Baja_California_Sur	24	Female		GK	AY.26
	hCoV-19/Mexico/BCS-LANGEBIO_IMSS_1460/2021	EPI_ISL_2942579		2021-06-04	Baja_California_Sur	28	Female		G	AY.26
	hCoV-19/Mexico/BCS-LANGEBIO_IMSS_1481/2021	EPI_ISL_2942598		2021-06-07	Baja_California_Sur	37	Male		G	AY.26
	hCoV-19/Mexico/BCS-LANGEBIO_IMSS_1482/2021	EPI_ISL_2942599		2021-06-07	Baja_California_Sur	37	Male		G	AY.26
	hCoV-19/Mexico/BCS-LANGEBIO_IMSS_1483/2021	EPI_ISL_2942600		2021-06-07	Baja_California_Sur	39	Female		GK	AY.26
	hCoV-19/Mexico/BCS-LANGEBIO_IMSS_1484/2021	EPI_ISL_2942601		2021-06-07	Baja_California_Sur	37	Male		GK	AY.26
	hCoV-19/Mexico/BCS-LANGEBIO_IMSS_1486/2021	EPI_ISL_2942603		2021-06-07	Baja_California_Sur	40	Male		GK	AY.26
	hCoV-19/Mexico/BCS-LANGEBIO_IMSS_1498/2021	EPI_ISL_2942610		2021-06-07	Baja_California_Sur	47	Female		G	AY.26
	hCoV-19/Mexico/BCS-LANGEBIO_IMSS_1499/2021	EPI_ISL_2942611		2021-06-06	Baja_California_Sur	49	Male		G	AY.26
	hCoV-19/Mexico/BCS-LANGEBIO_IMSS_1500/2021	EPI_ISL_2942612		2021-06-06	Baja_California_Sur	22	Female		G	AY.26
	hCoV-19/Mexico/BCS-LANGEBIO_IMSS_1501/2021	EPI_ISL_2942613		2021-06-08	Baja_California_Sur	44	Male		G	AY.26
	hCoV-19/Mexico/BCS-LANGEBIO_IMSS_1502/2021	EPI_ISL_2942614		2021-06-09	Baja_California_Sur	29	Male		G	AY.26
	hCoV-19/Mexico/BCS-LANGEBIO_IMSS_1503/2021	EPI_ISL_2942615		2021-06-08	Baja_California_Sur	36	Female		G	AY.26
	hCoV-19/Mexico/BCS-LANGEBIO_IMSS_1504/2021	EPI_ISL_2942616		2021-06-08	Baja_California_Sur	40	Male		G	AY.26
	hCoV-19/Mexico/BCS-LANGEBIO_IMSS_1506/2021	EPI_ISL_2942618		2021-06-08	Baja_California_Sur	24	Female		G	AY.26
	hCoV-19/Mexico/BCS-LANGEBIO_IMSS_1507/2021	EPI_ISL_2942619		2021-06-08	Baja_California_Sur	50	Female		G	AY.26
	hCoV-19/Mexico/BCS-LANGEBIO_IMSS_1508/2021	EPI_ISL_2942620		2021-06-08	Baja_California_Sur	21	Female		G	AY.26
	hCoV-19/Mexico/BCS-LANGEBIO_IMSS_1510/2021	EPI_ISL_2942622		2021-06-07	Baja_California_Sur	34	Male		G	AY.100
	hCoV-19/Mexico/BCS-LANGEBIO_IMSS_1511/2021	EPI_ISL_2942623		2021-06-07	Baja_California_Sur	21	Male		G	AY.100
	hCoV-19/Mexico/BCS-LANGEBIO_IMSS_1512/2021	EPI_ISL_2942624		2021-06-07	Baja_California_Sur	40	Male		G	AY.20
	hCoV-19/Mexico/BCS-LANGEBIO_IMSS_1714/2021	EPI_ISL_2942799		2021-06-17	Baja_California_Sur	71	Female		GK	AY.26
	hCoV-19/Mexico/BCS-LANGEBIO_IMSS_1715/2021	EPI_ISL_2942800		2021-06-17	Baja_California_Sur	41	Male		G	AY.26
	hCoV-19/Mexico/BCS-LANGEBIO_IMSS_1716/2021	EPI_ISL_2942801		2021-06-15	Baja_California_Sur	30	Male		G	AY.26
	hCoV-19/Mexico/BCS-LANGEBIO_IMSS_1717/2021	EPI_ISL_2942802		2021-06-15	Baja_California_Sur	43	Female		G	AY.26
	hCoV-19/Mexico/BCS-LANGEBIO_IMSS_1718/2021	EPI_ISL_2942803		2021-06-16	Baja_California_Sur	36	Male		G	AY.26
	hCoV-19/Mexico/BCS-LANGEBIO_IMSS_1725/2021	EPI_ISL_2942809		2021-06-17	Baja_California_Sur	25	Male		G	AY.26
	hCoV-19/Mexico/BCS-LANGEBIO_IMSS_1726/2021	EPI_ISL_2942810		2021-06-18	Baja_California_Sur	46	Female		G	AY.26
	hCoV-19/Mexico/BCS-LANGEBIO_IMSS_1727/2021	EPI_ISL_2942811		2021-06-17	Baja_California_Sur	38	Female		G	AY.26
	hCoV-19/Mexico/BCS-LANGEBIO_IMSS_1775/2021	EPI_ISL_2942852		2021-06-27	Baja_California_Sur	43	Male		G	AY.26
	hCoV-19/Mexico/BCS-LANGEBIO_IMSS_1776/2021	EPI_ISL_2942853		2021-06-24	Baja_California_Sur	44	Male		G	AY.26
	hCoV-19/Mexico/BCS-LANGEBIO_IMSS_1777/2021	EPI_ISL_2942854		2021-06-25	Baja_California_Sur	20	Male		G	AY.26
	hCoV-19/Mexico/BCS-LANGEBIO_IMSS_1778/2021	EPI_ISL_2942855		2021-06-27	Baja_California_Sur	32	Male		G	AY.26
	hCoV-19/Mexico/BCS-LANGEBIO_IMSS_1779/2021	EPI_ISL_2942856		2021-06-28	Baja_California_Sur	18	Female		G	AY.26
	hCoV-19/Mexico/BCS-LANGEBIO_IMSS_1780/2021	EPI_ISL_2942857		2021-06-28	Baja_California_Sur	55	Male		G	AY.26
	hCoV-19/Mexico/BCS-LANGEBIO_IMSS_1781/2021	EPI_ISL_2942858		2021-06-28	Baja_California_Sur	33	Male		G	AY.26
	hCoV-19/Mexico/BCS-LANGEBIO_IMSS_1782/2021	EPI_ISL_2942859		2021-06-29	Baja_California_Sur	55	Female		G	AY.26
	hCoV-19/Mexico/BCS-LANGEBIO_IMSS_1783/2021	EPI_ISL_2942860		2021-06-29	Baja_California_Sur	36	Male		G	AY.26
	hCoV-19/Mexico/CAM_IBT_IMSS_202101022154/NC/2021	EPI_ISL_4879067		2021-09-09	Campeche	41	Female		GK	AY.26
	hCoV-19/Mexico/CAM_IBT_IMSS_202101022155/NC/2021	EPI_ISL_4879065		2021-09-09	Campeche	37	Female		GK	AY.20
	hCoV-19/Mexico/CAM_IBT_IMSS_2589/2021	EPI_ISL_4006309		2021-08-07	Campeche	30	Male		GK	AY.26
	hCoV-19/Mexico/CAM_IBT_IMSS_2590/2021	EPI_ISL_4006310		2021-08-07	Campeche	44	Male		GK	AY.100
	hCoV-19/Mexico/CAM_IBT_IMSS_2591/2021	EPI_ISL_4006311		2021-08-09	Campeche	27	Male		GK	AY.20
	hCoV-19/Mexico/CAM_IBT_IMSS_2592/2021	EPI_ISL_4006312		2021-08-09	Campeche	29	Female		GK	AY.20
	hCoV-19/Mexico/CAM_IBT_IMSS_2600/2021	EPI_ISL_4006320		2021-08-10	Campeche	26	Male		GK	AY.26
	hCoV-19/Mexico/CAM_IBT_IMSS_2601/2021	EPI_ISL_4006321		2021-08-10	Campeche	22	Male		GK	AY.26
	hCoV-19/Mexico/CAM_IBT_IMSS_2605/2021	EPI_ISL_4006325		2021-08-10	Campeche	31	Female		GK	AY.100
	hCoV-19/Mexico/CAM_IBT_IMSS_2606/2021	EPI_ISL_4006326		2021-08-09	Campeche	20	Male		GK	AY.100
	hCoV-19/Mexico/CAM_IBT_IMSS_2607/2021	EPI_ISL_4006327		2021-08-09	Campeche	44	Male		GK	AY.100
	hCoV-19/Mexico/CAM_IBT_IMSS_2608/2021	EPI_ISL_4006328		2021-08-09	Campeche	36	Male		GK	AY.20
	hCoV-19/Mexico/CAM_IBT_IMSS_2609/2021	EPI_ISL_4006329		2021-08-10	Campeche	29	Female		GK	AY.26
	hCoV-19/Mexico/CAM_IBT_IMSS_2622/2021	EPI_ISL_4006342		2021-08-13	Campeche	19	Male		GK	AY.100
	hCoV-19/Mexico/CAM_IBT_IMSS_2623/2021	EPI_ISL_4006343		2021-08-13	Campeche	21	Female		GK	AY.100
	hCoV-19/Mexico/CAM_IBT_IMSS_2624/2021	EPI_ISL_4006344		2021-08-13	Campeche	50	Female		GK	AY.100
	hCoV-19/Mexico/CAM_IBT_IMSS_2625/2021	EPI_ISL_4006345		2021-08-13	Campeche	65	Female		GK	AY.62
	hCoV-19/Mexico/CAM_IBT_IMSS_2626/2021	EPI_ISL_4006346		2021-08-09	Campeche	35	Male		GK	AY.100
	hCoV-19/Mexico/CAM_IBT_IMSS_2628/2021	EPI_ISL_4006348		2021-08-13	Campeche	27	Female		GK	AY.20
	hCoV-19/Mexico/CAM_IBT_IMSS_2629/2021	EPI_ISL_4006349		2021-08-13	Campeche	21	Male		GK	AY.100
	hCoV-19/Mexico/CAM_IBT_IMSS_2630/2021	EPI_ISL_4006350		2021-08-13	Campeche	23	Female		GK	AY.20
	hCoV-19/Mexico/CAM_IBT_IMSS_2653/2021	EPI_ISL_4006373		2021-08-16	Campeche	64	Female		GK	AY.26
	hCoV-19/Mexico/CAM_IBT_IMSS_2654/2021	EPI_ISL_4006374		2021-08-16	Campeche	46	Male		GK	AY.26
	hCoV-19/Mexico/CAM_IBT_IMSS_2655/2021	EPI_ISL_4006375		2021-08-16	Campeche	92	Female		GK	AY.100
	hCoV-19/Mexico/CAM_IBT_IMSS_2656/2021	EPI_ISL_4006376		2021-08-16	Campeche	79	Male		GK	AY.100
	hCoV-19/Mexico/CAM_IBT_IMSS_3113/2021	EPI_ISL_4879001		2021-09-08	Campeche	63	Male		GK	AY.100
	hCoV-19/Mexico/CAM_IBT_IMSS_3114/2021	EPI_ISL_4879002		2021-09-08	Campeche	39	Male		GK	AY.100
	hCoV-19/Mexico/CAM_IBT_IMSS_3115/2021	EPI_ISL_4878564		2021-09-06	Campeche	12	Female		GK	AY.26
	hCoV-19/Mexico/CAM_IBT_IMSS_3116/2021	EPI_ISL_4878670		2021-09-08	Campeche	55	Male		GK	AY.26
	hCoV-19/Mexico/CAM_IBT_IMSS_3117/2021	EPI_ISL_4879003		2021-09-08	Campeche	9	Female		GK	AY.4
	hCoV-19/Mexico/CAM_IBT_IMSS_3118/2021	EPI_ISL_4879024		2021-09-08	Campeche	6	Female		GK	AY.4
	hCoV-19/Mexico/CAM_IBT_IMSS_3122/2021	EPI_ISL_4878673		2021-09-09	Campeche	29	Male		GK	AY.20
	hCoV-19/Mexico/CAM_IBT_IMSS_3123/2021	EPI_ISL_4878674		2021-09-09	Campeche	46	Male		GK	AY.20
	hCoV-19/Mexico/CAM_IBT_IMSS_3124/2021	EPI_ISL_4878675		2021-09-09	Campeche	65	Male		GK	AY.100
	hCoV-19/Mexico/CAM_IBT_IMSS_3125/2021	EPI_ISL_4878676		2021-09-09	Campeche	62	Female		GK	AY.100
	hCoV-19/Mexico/CAM_IBT_IMSS_3126/2021	EPI_ISL_4878677		2021-09-09	Campeche	54	Male		GK	AY.122
	hCoV-19/Mexico/CAM_IBT_IMSS_3127/2021	EPI_ISL_4879004		2021-09-09	Campeche	22	Male		GK	AY.100
	hCoV-19/Mexico/CAM_IBT_IMSS_3128/2021	EPI_ISL_4879005		2021-09-09	Campeche	86	Female		GK	AY.100
	hCoV-19/Mexico/CAM_IBT_IMSS_3129/2021	EPI_ISL_4878678		2021-09-11	Campeche	68	Female		GK	AY.20
	hCoV-19/Mexico/CAM_IBT_IMSS_3130/2021	EPI_ISL_4878679		2021-09-10	Campeche	24	Male		GK	AY.20
	hCoV-19/Mexico/CAM_IBT_IMSS_3131/2021	EPI_ISL_4879006		2021-09-10	Campeche	20	Female		GK	AY.100
	hCoV-19/Mexico/CAM_IBT_IMSS_3132/2021	EPI_ISL_4879007		2021-09-10	Campeche	28	Female		GK	AY.100
	hCoV-19/Mexico/CAM_IBT_IMSS_3133/2021	EPI_ISL_4878680		2021-09-10	Campeche	42	Male		GK	AY.26
	hCoV-19/Mexico/CAM_IBT_IMSS_3134/2021	EPI_ISL_4878681		2021-09-10	Campeche	44	Male		GK	AY.20
	hCoV-19/Mexico/CAM_IBT_IMSS_3150/2021	EPI_ISL_4879052		2021-09-11	Campeche	72	Female		GK	AY.113
	hCoV-19/Mexico/CAM_IBT_IMSS_3153/2021	EPI_ISL_4878691		2021-09-13	Campeche	36	Female		GK	AY.100
	hCoV-19/Mexico/CAM_IBT_IMSS_3154/2021	EPI_ISL_4878692		2021-09-12	Campeche	50	Male		GK	AY.26
	hCoV-19/Mexico/CAM_IBT_IMSS_3167/2021	EPI_ISL_4878703		2021-09-13	Campeche	86	Female		GK	AY.26
	hCoV-19/Mexico/CAM_IBT_IMSS_3569/2021	EPI_ISL_5936675		2021-10-03	Campeche	88	Female		GK	AY.100
	hCoV-19/Mexico/CAM_IBT_IMSS_3570/2021	EPI_ISL_5936676		2021-10-03	Campeche	69	Female		GK	AY.100
	hCoV-19/Mexico/CAM_IBT_IMSS_3573/2021	EPI_ISL_5936660		2021-10-02	Campeche	75	Male		GK	AY.100
	hCoV-19/Mexico/CAM_IBT_IMSS_3574/2021	EPI_ISL_5936677		2021-10-02	Campeche	64	Female		GK	AY.100
	hCoV-19/Mexico/CAM_IBT_IMSS_3575/2021	EPI_ISL_5936678		2021-10-03	Campeche	7	Male		GK	AY.100
	hCoV-19/Mexico/CAM_IBT_IMSS_3576/2021	EPI_ISL_5936983		2021-10-03	Campeche	15	Male		GK	AY.20
	hCoV-19/Mexico/CAM_IBT_IMSS_3577/2021	EPI_ISL_5936984		2021-10-03	Campeche	11	Female		GK	AY.20
	hCoV-19/Mexico/CAM_IBT_IMSS_3578/2021	EPI_ISL_5936679		2021-10-03	Campeche	55	Male		GK	AY.100
	hCoV-19/Mexico/CAM_IBT_IMSS_3579/2021	EPI_ISL_5936985		2021-10-04	Campeche	81	Female		GK	AY.26
	hCoV-19/Mexico/CAM_IBT_IMSS_3580/2021	EPI_ISL_5936986		2021-10-04	Campeche	17	Female		GK	AY.20
	hCoV-19/Mexico/CAM_IBT_IMSS_3581/2021	EPI_ISL_5936680		2021-10-04	Campeche	57	Male		GK	AY.100
	hCoV-19/Mexico/CAM_IBT_IMSS_3591/2021	EPI_ISL_5936681		2021-10-05	Campeche	69	Male		GK	AY.100
	hCoV-19/Mexico/CAM_IBT_IMSS_3592/2021	EPI_ISL_5936987		2021-10-05	Campeche	64	Female		GK	AY.26
	hCoV-19/Mexico/CAM_IBT_IMSS_3593/2021	EPI_ISL_5936616		2021-10-05	Campeche	68	Male		GK	AY.100
	hCoV-19/Mexico/CAM_IBT_IMSS_3594/2021	EPI_ISL_5936988		2021-10-05	Campeche	24	Female		GK	AY.26
	hCoV-19/Mexico/CAM_IBT_IMSS_3595/2021	EPI_ISL_5936626		2021-10-05	Campeche	41	Female		GK	AY.20
	hCoV-19/Mexico/CAM_IBT_IMSS_3596/2021	EPI_ISL_5936682		2021-10-05	Campeche	75	Female		GK	AY.100
	hCoV-19/Mexico/CAM_IBT_IMSS_3597/2021	EPI_ISL_5936580		2021-10-06	Campeche	69	Male		GK	AY.100
	hCoV-19/Mexico/CAM_IBT_IMSS_3601/2021	EPI_ISL_5936667		2021-10-06	Campeche	83	Male		GK	AY.100
	hCoV-19/Mexico/CAM_IBT_IMSS_3605/2021	EPI_ISL_5936612		2021-10-06	Campeche	34	Male		GK	AY.20
	hCoV-19/Mexico/CAM_IBT_IMSS_3606/2021	EPI_ISL_5936989		2021-10-06	Campeche	29	Female		GK	AY.20
	hCoV-19/Mexico/CAM_IBT_IMSS_3607/2021	EPI_ISL_5936990		2021-10-06	Campeche	34	Male		GK	AY.20
	hCoV-19/Mexico/CAM_IBT_IMSS_3608/2021	EPI_ISL_5936683		2021-10-06	Campeche	58	Male		GK	AY.100
	hCoV-19/Mexico/CAM_IBT_IMSS_3622/2021	EPI_ISL_5936991		2021-10-05	Campeche	35	Male		GK	AY.62
	hCoV-19/Mexico/CAM_IBT_IMSS_3623/2021	EPI_ISL_5936992		2021-10-07	Campeche	16	Male		GK	AY.20
	hCoV-19/Mexico/CAM_IBT_IMSS_3624/2021	EPI_ISL_5936993		2021-10-07	Campeche	17	Male		GK	AY.20
	hCoV-19/Mexico/CAM_IBT_IMSS_3626/2021	EPI_ISL_5936994		2021-10-08	Campeche	57	Female		GK	AY.20
	hCoV-19/Mexico/CAM_IBT_IMSS_3627/2021	EPI_ISL_5936684		2021-10-08	Campeche	45	Female		GK	AY.100
	hCoV-19/Mexico/CAM_IBT_IMSS_3628/2021	EPI_ISL_5936995		2021-10-08	Campeche	29	Female		GK	AY.20
	hCoV-19/Mexico/CAM_IBT_IMSS_3629/2021	EPI_ISL_5936596		2021-10-08	Campeche	51	Female		GK	AY.20
	hCoV-19/Mexico/CAM_IBT_IMSS_3630/2021	EPI_ISL_5936996		2021-10-08	Campeche	39	Male		GK	AY.122
	hCoV-19/Mexico/CAM_IBT_IMSS_3646/2021	EPI_ISL_5936623		2021-10-08	Campeche	74	Male		GK	AY.100
	hCoV-19/Mexico/CAM_IBT_IMSS_3647/2021	EPI_ISL_5936685		2021-10-11	Campeche	1	Male		GK	AY.100
	hCoV-19/Mexico/CAM_IBT_IMSS_3648/2021	EPI_ISL_5936609		2021-10-10	Campeche	64	Male		GK	AY.100
	hCoV-19/Mexico/CAM_IBT_IMSS_4043/2021	EPI_ISL_6863443		2021-10-29	Campeche	35	Female		GK	AY.100
	hCoV-19/Mexico/CAM_IBT_IMSS_4044/2021	EPI_ISL_6863444		2021-10-29	Campeche	68	Male		GK	AY.113
	hCoV-19/Mexico/CAM_IBT_IMSS_4045/2021	EPI_ISL_6863445		2021-10-31	Campeche	71	Female		GK	AY.20
	hCoV-19/Mexico/CAM_IBT_IMSS_4046/2021	EPI_ISL_6863446		2021-11-01	Campeche	51	Male		GK	AY.26
	hCoV-19/Mexico/CAM_IBT_IMSS_4047/2021	EPI_ISL_6863447		2021-11-01	Campeche	53	Female		GK	AY.26
	hCoV-19/Mexico/CAM_IBT_IMSS_4048/2021	EPI_ISL_6863448		2021-11-02	Campeche	40	Female		GK	AY.20
	hCoV-19/Mexico/CAM_IBT_IMSS_4056/2021	EPI_ISL_6863456		2021-10-31	Campeche	85	Female		GK	AY.100
	hCoV-19/Mexico/CAM_IBT_IMSS_4062/2021	EPI_ISL_6863463		2021-11-04	Campeche	52	Male		GK	AY.20
	hCoV-19/Mexico/CAM_IBT_IMSS_4063/2021	EPI_ISL_6863464		2021-11-04	Campeche	22	Female		GK	AY.113
	hCoV-19/Mexico/CAM_IBT_IMSS_4064/2021	EPI_ISL_6863465		2021-11-04	Campeche	31	Male		GK	AY.26
	hCoV-19/Mexico/CAM_IBT_IMSS_4065/2021	EPI_ISL_6863466		2021-11-04	Campeche	48	Female		GK	AY.20
	hCoV-19/Mexico/CAM_IBT_IMSS_4066/2021	EPI_ISL_6863467		2021-11-05	Campeche	72	Female		GK	AY.100
	hCoV-19/Mexico/CAM_IBT_IMSS_4068/2021	EPI_ISL_6863469		2021-11-05	Campeche	50	Female		GK	AY.20
	hCoV-19/Mexico/CAM_IBT_IMSS_4069/2021	EPI_ISL_6863470		2021-11-08	Campeche	67	Female		GK	AY.100
	hCoV-19/Mexico/CAM_IBT_IMSS_4070/2021	EPI_ISL_6863471		2021-11-08	Campeche	68	Male		GK	AY.100
	hCoV-19/Mexico/CAM_IBT_IMSS_4071/2021	EPI_ISL_6863472		2021-11-08	Campeche	31	Male		GK	AY.26
	hCoV-19/Mexico/CAM_INER_IMSS_1695/2021	EPI_ISL_3556966		2021-07-23	Campeche	34	Male		GK	AY.26
	hCoV-19/Mexico/CAM_INER_IMSS_1697/2021	EPI_ISL_3556968		2021-07-23	Campeche	63	Female		GK	AY.20
	hCoV-19/Mexico/CAM_INER_IMSS_1713/2021	EPI_ISL_3556984		2021-07-26	Campeche	22	Male		GK	B.1.617.2
	hCoV-19/Mexico/CAM_INER_IMSS_1714/2021	EPI_ISL_3556985		2021-07-26	Campeche	35	Female		GK	B.1.617.2
	hCoV-19/Mexico/CAM_INER_IMSS_1996/2021	EPI_ISL_4299419		2021-08-11	Campeche	27	Female		GK	B.1.617.2
	hCoV-19/Mexico/CAM_INER_IMSS_1997/2021	EPI_ISL_4299420		2021-08-11	Campeche	45	Female		GK	B.1.617.2
	hCoV-19/Mexico/CAM_INER_IMSS_1998/2021	EPI_ISL_4299421		2021-08-11	Campeche	12	Female		GK	B.1.617.2
	hCoV-19/Mexico/CAM_INER_IMSS_2008/2021	EPI_ISL_4299431		2021-08-16	Campeche	37	Female		GK	AY.20
	hCoV-19/Mexico/CAM_INER_IMSS_2009/2021	EPI_ISL_4299432		2021-08-17	Campeche	41	Male		GK	B.1.617.2
	hCoV-19/Mexico/CAM_INER_IMSS_2010/2021	EPI_ISL_4299433		2021-08-16	Campeche	46	Male		GK	AY.26
	hCoV-19/Mexico/CAM_INER_IMSS_2012/2021	EPI_ISL_4299435		2021-08-16	Campeche	26	Female		GK	AY.26
	hCoV-19/Mexico/CAM_INER_IMSS_2124/2021	EPI_ISL_4299547		2021-08-21	Campeche	43	Male		GK	B.1.617.2
	hCoV-19/Mexico/CAM_INER_IMSS_2125/2021	EPI_ISL_4299548		2021-08-21	Campeche	92	Female		GK	AY.20
	hCoV-19/Mexico/CAM_INER_IMSS_2126/2021	EPI_ISL_4299549		2021-08-21	Campeche	83	Male		GK	B.1.617.2
	hCoV-19/Mexico/CAM_INER_IMSS_2127/2021	EPI_ISL_4299550		2021-08-21	Campeche	4	Female		GK	B.1.617.2
	hCoV-19/Mexico/CAM_INER_IMSS_2129/2021	EPI_ISL_4299552		2021-08-20	Campeche	59	Female		GK	AY.26
	hCoV-19/Mexico/CAM_INER_IMSS_2151/2021	EPI_ISL_4299574		2021-08-23	Campeche	81	Male		GK	AY.20
	hCoV-19/Mexico/CAM_INER_IMSS_2152/2021	EPI_ISL_4299575		2021-08-23	Campeche	60	Male		GK	B.1.617.2
	hCoV-19/Mexico/CAM_INER_IMSS_2153/2021	EPI_ISL_4299576		2021-08-22	Campeche	37	Male		GK	B.1.617.2
	hCoV-19/Mexico/CAM_INER_IMSS_2154/2021	EPI_ISL_4299577		2021-08-22	Campeche	76	Female		GK	B.1.617.2
	hCoV-19/Mexico/CAM_INER_IMSS_2160/2021	EPI_ISL_4299583		2021-08-21	Campeche	34	Male		GK	AY.122
	hCoV-19/Mexico/CAM_INER_IMSS_2161/2021	EPI_ISL_4299584		2021-08-22	Campeche	21	Female		GK	B.1.617.2
	hCoV-19/Mexico/CAM_INER_IMSS_2162/2021	EPI_ISL_4299585		2021-08-22	Campeche	38	Female		GK	B.1.617.2
	hCoV-19/Mexico/CAM_INER_IMSS_2446/2021	EPI_ISL_5193924		2021-09-17	Campeche	59	Male		GK	B.1.617.2
	hCoV-19/Mexico/CAM_INER_IMSS_2447/2021	EPI_ISL_5193925		2021-09-18	Campeche	39	Male		GK	B.1.617.2
	hCoV-19/Mexico/CAM_INER_IMSS_2448/2021	EPI_ISL_5193936		2021-09-18	Campeche	47	Male		GK	B.1.617.2
	hCoV-19/Mexico/CAM_INER_IMSS_2454/2021	EPI_ISL_5194263		2021-09-19	Campeche	61	Male		GK	AY.26
	hCoV-19/Mexico/CAM_INER_IMSS_2455/2021	EPI_ISL_5194264		2021-09-16	Campeche	37	Male		GK	AY.26
	hCoV-19/Mexico/CAM_INER_IMSS_2461/2021	EPI_ISL_5193937		2021-09-20	Campeche	35	Male		GK	B.1.617.2
	hCoV-19/Mexico/CAM_INER_IMSS_2462/2021	EPI_ISL_5193926		2021-09-20	Campeche	73	Male		GK	B.1.617.2
	hCoV-19/Mexico/CAM_INER_IMSS_2463/2021	EPI_ISL_5193927		2021-09-19	Campeche	34	Female		GK	B.1.617.2
	hCoV-19/Mexico/CAM_INER_IMSS_2464/2021	EPI_ISL_5194265		2021-09-20	Campeche	62	Female		GK	AY.62
	hCoV-19/Mexico/CAM_INER_IMSS_2465/2021	EPI_ISL_5193938		2021-09-14	Campeche	32	Male		GK	B.1.617.2
	hCoV-19/Mexico/CAM_INER_IMSS_2466/2021	EPI_ISL_5193939		2021-09-14	Campeche	36	Female		GK	B.1.617.2
	hCoV-19/Mexico/CAM_INER_IMSS_2467/2021	EPI_ISL_5193940		2021-09-14	Campeche	26	Female		GK	B.1.617.2
	hCoV-19/Mexico/CAM_INER_IMSS_2469/2021	EPI_ISL_5194266		2021-09-20	Campeche	62	Male		GK	AY.26
	hCoV-19/Mexico/CAM_INER_IMSS_2470/2021	EPI_ISL_5193941		2021-09-20	Campeche	62	Female		GK	B.1.617.2
	hCoV-19/Mexico/CAM_INER_IMSS_2943/2021	EPI_ISL_6227539		2021-10-14	Campeche	66	Female		GK	B.1.617.2
	hCoV-19/Mexico/CAM_INER_IMSS_2944/2021	EPI_ISL_6227554		2021-10-12	Campeche	75	Female		GK	B.1.617.2
	hCoV-19/Mexico/CAM_INER_IMSS_2945/2021	EPI_ISL_6227540		2021-10-13	Campeche	40	Female		GK	B.1.617.2
	hCoV-19/Mexico/CAM_INER_IMSS_2956/2021	EPI_ISL_6227374		2021-10-13	Campeche	22	Male		GK	AY.20
	hCoV-19/Mexico/CAM_INER_IMSS_2957/2021	EPI_ISL_6227375		2021-10-13	Campeche	40	Female		GK	AY.20
	hCoV-19/Mexico/CAM_INER_IMSS_2958/2021	EPI_ISL_6227568		2021-10-12	Campeche	36	Female		GK	B.1.617.2
	hCoV-19/Mexico/CAM_INER_IMSS_2959/2021	EPI_ISL_6227376		2021-10-12	Campeche	19	Female		GK	AY.20
	hCoV-19/Mexico/CAM_INER_IMSS_2960/2021	EPI_ISL_6227377		2021-10-13	Campeche	37	Male		GK	AY.20
	hCoV-19/Mexico/CAM_INER_IMSS_2961/2021	EPI_ISL_6227378		2021-10-13	Campeche	26	Male		GK	AY.20
	hCoV-19/Mexico/CAM_INER_IMSS_2962/2021	EPI_ISL_6227558		2021-10-13	Campeche	39	Male		GK	AY.122
	hCoV-19/Mexico/CAM_INER_IMSS_2963/2021	EPI_ISL_6227560		2021-10-14	Campeche	51	Female		GK	B.1.617.2
	hCoV-19/Mexico/CAM_INER_IMSS_2964/2021	EPI_ISL_6227559		2021-10-14	Campeche	61	Male		GK	AY.122
	hCoV-19/Mexico/CAM_INER_IMSS_2965/2021	EPI_ISL_6227379		2021-10-15	Campeche	44	Female		GK	B.1.617.2
	hCoV-19/Mexico/CAM_INER_IMSS_2966/2021	EPI_ISL_6227380		2021-10-15	Campeche	68	Female		GK	AY.20
	hCoV-19/Mexico/CAM_INER_IMSS_2975/2021	EPI_ISL_6227543		2021-10-14	Campeche	74	Male		GK	B.1.617.2
	hCoV-19/Mexico/CAM_INER_IMSS_2978/2021	EPI_ISL_6227569		2021-10-16	Campeche	41	Female		GK	B.1.617.2
	hCoV-19/Mexico/CAM_INER_IMSS_2979/2021	EPI_ISL_6227544		2021-10-17	Campeche	80	Female		GK	B.1.617.2
	hCoV-19/Mexico/CAM_INER_IMSS_2980/2021	EPI_ISL_6227581		2021-10-14	Campeche	59	Male		GK	B.1.617.2
	hCoV-19/Mexico/CAM_INER_IMSS_2981/2021	EPI_ISL_6227390		2021-10-14	Campeche	68	Male		GK	AY.20
	hCoV-19/Mexico/CAM_INER_IMSS_2982/2021	EPI_ISL_6227391		2021-10-17	Campeche	40	Female		GK	AY.20
	hCoV-19/Mexico/CAM_INER_IMSS_2983/2021	EPI_ISL_6227392		2021-10-17	Campeche	63	Male		GK	AY.20
	hCoV-19/Mexico/CAM_INER_IMSS_2984/2021	EPI_ISL_6227393		2021-10-18	Campeche	41	Male		GK	AY.20
	hCoV-19/Mexico/CAM_INER_IMSS_2985/2021	EPI_ISL_6227394		2021-10-18	Campeche	69	Male		GK	AY.26
	hCoV-19/Mexico/CAM_INER_IMSS_2986/2021	EPI_ISL_6227395		2021-10-18	Campeche	53	Male		GK	AY.20
	hCoV-19/Mexico/CAM_LANGEBIO_IMSS_1970/2021	EPI_ISL_3805692		2021-08-01	Campeche	27	Male		GK	AY.100
	hCoV-19/Mexico/CAM_LANGEBIO_IMSS_1978/2021	EPI_ISL_3805661		2021-08-01	Campeche	26	Male		GK	AY.26
	hCoV-19/Mexico/CAM_LANGEBIO_IMSS_1980/2021	EPI_ISL_3805676		2021-07-31	Campeche	44	Male		GK	AY.26
	hCoV-19/Mexico/CAM_LANGEBIO_IMSS_1995/2021	EPI_ISL_3805686		2021-08-02	Campeche	76	Male		GK	AY.26
	hCoV-19/Mexico/CAM_LANGEBIO_IMSS_1996/2021	EPI_ISL_3805693		2021-08-02	Campeche	48	Female		GK	AY.100
	hCoV-19/Mexico/CAM_LANGEBIO_IMSS_1997/2021	EPI_ISL_3805694		2021-08-03	Campeche	56	Male		GK	AY.113
	hCoV-19/Mexico/CAM_LANGEBIO_IMSS_20541_NC/2021	EPI_ISL_4549834		2021-08-27	Campeche	42	Female		GK	AY.100
	hCoV-19/Mexico/CAM_LANGEBIO_IMSS_20542_NC/2021	EPI_ISL_4549835		2021-08-27	Campeche	54	Female		GK	AY.3
	hCoV-19/Mexico/CAM_LANGEBIO_IMSS_20558_NC/2021	EPI_ISL_4549836		2021-08-27	Campeche	37	Female		GK	AY.100
	hCoV-19/Mexico/CAM_LANGEBIO_IMSS_20901_NC/2021	EPI_ISL_4549837		2021-08-30	Campeche	26	Male		G	AY.20
	hCoV-19/Mexico/CAM_LANGEBIO_IMSS_2269/2021	EPI_ISL_4549838		2021-08-29	Campeche	75	Male		GK	AY.100
	hCoV-19/Mexico/CAM_LANGEBIO_IMSS_2270/2021	EPI_ISL_4549839		2021-08-27	Campeche	33	Male		GK	AY.100
	hCoV-19/Mexico/CAM_LANGEBIO_IMSS_2271/2021	EPI_ISL_4549840		2021-08-27	Campeche	31	Female		GK	AY.122
	hCoV-19/Mexico/CAM_LANGEBIO_IMSS_2272/2021	EPI_ISL_4549841		2021-08-27	Campeche	72	Male		GK	AY.113
	hCoV-19/Mexico/CAM_LANGEBIO_IMSS_2273/2021	EPI_ISL_4549842		2021-08-27	Campeche	19	Female		GK	AY.26
	hCoV-19/Mexico/CAM_LANGEBIO_IMSS_2274/2021	EPI_ISL_4549843		2021-08-27	Campeche	32	Male		GK	AY.26
	hCoV-19/Mexico/CAM_LANGEBIO_IMSS_2275/2021	EPI_ISL_4549844		2021-08-27	Campeche	46	Male		GK	AY.100
	hCoV-19/Mexico/CAM_LANGEBIO_IMSS_2277/2021	EPI_ISL_4549845		2021-08-28	Campeche	83	Male		GK	AY.100
	hCoV-19/Mexico/CAM_LANGEBIO_IMSS_2278/2021	EPI_ISL_4549846		2021-08-28	Campeche	68	Male		GK	AY.14
	hCoV-19/Mexico/CAM_LANGEBIO_IMSS_2279/2021	EPI_ISL_4549847		2021-08-27	Campeche	82	Male		GK	AY.100
	hCoV-19/Mexico/CAM_LANGEBIO_IMSS_2286/2021	EPI_ISL_4549848		2021-08-29	Campeche	73	Male		GK	AY.100
	hCoV-19/Mexico/CAM_LANGEBIO_IMSS_2305/2021	EPI_ISL_4549850		2021-08-31	Campeche	62	Female		GK	AY.26
	hCoV-19/Mexico/CAM_LANGEBIO_IMSS_2309/2021	EPI_ISL_4549851		2021-08-30	Campeche	81	Male		GK	AY.14
	hCoV-19/Mexico/CAM_LANGEBIO_IMSS_2311/2021	EPI_ISL_4549853		2021-08-30	Campeche	85	Male		GK	AY.26
	hCoV-19/Mexico/CAM_LANGEBIO_IMSS_2312/2021	EPI_ISL_4549854		2021-08-31	Campeche	67	Female		GK	AY.100
	hCoV-19/Mexico/CAM_LANGEBIO_IMSS_2313/2021	EPI_ISL_4549855		2021-08-29	Campeche	33	Female		GK	AY.100
	hCoV-19/Mexico/CAM_LANGEBIO_IMSS_2314/2021	EPI_ISL_4549856		2021-08-30	Campeche	26	Female		GK	AY.113
	hCoV-19/Mexico/CAM_LANGEBIO_IMSS_2316/2021	EPI_ISL_4549858		2021-08-30	Campeche	87	Male		GK	AY.100
	hCoV-19/Mexico/CAM_LANGEBIO_IMSS_2317/2021	EPI_ISL_4549859		2021-08-30	Campeche	29	Male		GK	AY.100
	hCoV-19/Mexico/CAM_LANGEBIO_IMSS_2318/2021	EPI_ISL_4549860		2021-08-30	Campeche	25	Female		GK	AY.100
	hCoV-19/Mexico/CAM_LANGEBIO_IMSS_2319/2021	EPI_ISL_4549861		2021-08-30	Campeche	37	Female		GK	AY.100
	hCoV-19/Mexico/CAM_LANGEBIO_IMSS_2320/2021	EPI_ISL_4549862		2021-08-30	Campeche	38	Female		GK	AY.20
	hCoV-19/Mexico/CAM_LANGEBIO_IMSS_2322/2021	EPI_ISL_4549863		2021-08-30	Campeche	32	Male		GK	AY.100
	hCoV-19/Mexico/CAM_LANGEBIO_IMSS_2323/2021	EPI_ISL_4549864		2021-08-30	Campeche	52	Male		GK	AY.26
	hCoV-19/Mexico/CAM_LANGEBIO_IMSS_2749/2021	EPI_ISL_5850769		2021-09-25	Campeche	35	Female		GK	AY.100
	hCoV-19/Mexico/CAM_LANGEBIO_IMSS_2750/2021	EPI_ISL_5850770		2021-09-24	Campeche	81	Male		GK	AY.100
	hCoV-19/Mexico/CAM_LANGEBIO_IMSS_2751/2021	EPI_ISL_5850771		2021-09-24	Campeche	15	Female		GK	AY.100
	hCoV-19/Mexico/CAM_LANGEBIO_IMSS_2752/2021	EPI_ISL_5850772		2021-09-24	Campeche	84	Male		GK	AY.3
	hCoV-19/Mexico/CAM_LANGEBIO_IMSS_2753/2021	EPI_ISL_5850773		2021-09-25	Campeche	38	Male		GK	AY.100
	hCoV-19/Mexico/CAM_LANGEBIO_IMSS_2771/2021	EPI_ISL_5850791		2021-09-25	Campeche	57	Male		GK	AY.100
	hCoV-19/Mexico/CAM_LANGEBIO_IMSS_2772/2021	EPI_ISL_5850792		2021-09-26	Campeche	27	Male		GK	AY.100
	hCoV-19/Mexico/CAM_LANGEBIO_IMSS_2773/2021	EPI_ISL_5850793		2021-09-26	Campeche	41	Male		GK	AY.26
	hCoV-19/Mexico/CAM_LANGEBIO_IMSS_2774/2021	EPI_ISL_5850794		2021-09-23	Campeche	35	Female		GK	AY.26
	hCoV-19/Mexico/CAM_LANGEBIO_IMSS_2775/2021	EPI_ISL_5850795		2021-09-26	Campeche	32	Female		GK	AY.100
	hCoV-19/Mexico/CAM_LANGEBIO_IMSS_2799/2021	EPI_ISL_5850819		2021-09-27	Campeche	58	Female		GK	AY.100
	hCoV-19/Mexico/CAM_LANGEBIO_IMSS_2800/2021	EPI_ISL_5850820		2021-09-27	Campeche	61	Male		GK	AY.100
	hCoV-19/Mexico/CAM_LANGEBIO_IMSS_2801/2021	EPI_ISL_5850821		2021-09-27	Campeche	27	Female		GK	AY.20
	hCoV-19/Mexico/CAM_LANGEBIO_IMSS_2802/2021	EPI_ISL_5850822		2021-09-28	Campeche	89	Male		GK	AY.100
	hCoV-19/Mexico/CAM_LANGEBIO_IMSS_2803/2021	EPI_ISL_5850823		2021-09-27	Campeche	84	Female		GK	AY.100
	hCoV-19/Mexico/CAM_LANGEBIO_IMSS_2804/2021	EPI_ISL_5850824		2021-09-27	Campeche	26	Female		GK	AY.100
	hCoV-19/Mexico/CAM_LANGEBIO_IMSS_2805/2021	EPI_ISL_5850825		2021-09-27	Campeche	36	Female		GK	AY.100
	hCoV-19/Mexico/CAM_LANGEBIO_IMSS_3222/2021	EPI_ISL_6775752		2021-10-24	Campeche	62	Female		GK	B.1.617.2
	hCoV-19/Mexico/CAM_LANGEBIO_IMSS_3223/2021	EPI_ISL_6775753		2021-10-23	Campeche	48	Female		GK	AY.124
	hCoV-19/Mexico/CAM_LANGEBIO_IMSS_3224/2021	EPI_ISL_6775754		2021-10-23	Campeche	56	Female		GK	B.1.617.2
	hCoV-19/Mexico/CAM_LANGEBIO_IMSS_3225/2021	EPI_ISL_6775755		2021-10-24	Campeche	38	Female		GK	B.1.617.2
	hCoV-19/Mexico/CAM_LANGEBIO_IMSS_3226/2021	EPI_ISL_6775756		2021-10-24	Campeche	21	Female		GK	AY.20
	hCoV-19/Mexico/CAM_LANGEBIO_IMSS_3227/2021	EPI_ISL_6775757		2021-10-24	Campeche	28	Female		GK	AY.20
	hCoV-19/Mexico/CAM_LANGEBIO_IMSS_3228/2021	EPI_ISL_6775758		2021-10-25	Campeche	25	Male		GK	AY.113
	hCoV-19/Mexico/CHH_IBT_IMSS_1118016/NC/2021	EPI_ISL_6863345		2021-10-28	Chihuahua	34	Male		GK	AY.20
	hCoV-19/Mexico/CHH_IBT_IMSS_2299/2021	EPI_ISL_3347618		2021-07-08	Chihuahua	4	Female		GK	AY.100
	hCoV-19/Mexico/CHH_IBT_IMSS_2300/2021	EPI_ISL_3347619		2021-07-08	Chihuahua	34	Female		GK	AY.100
	hCoV-19/Mexico/CHH_IBT_IMSS_2301/2021	EPI_ISL_3347620		2021-07-08	Chihuahua	58	Female		GK	AY.100
	hCoV-19/Mexico/CHH_IBT_IMSS_2302/2021	EPI_ISL_3347565		2021-07-09	Chihuahua	32	Male		GK	AY.100
	hCoV-19/Mexico/CHH_IBT_IMSS_2303/2021	EPI_ISL_3347566		2021-07-09	Chihuahua	25	Male		GK	AY.100
	hCoV-19/Mexico/CHH_IBT_IMSS_2311/2021	EPI_ISL_3347627		2021-07-12	Chihuahua	58	Male		GK	AY.100
	hCoV-19/Mexico/CHH_IBT_IMSS_2312/2021	EPI_ISL_3347628		2021-07-09	Chihuahua	24	Male		GK	AY.100
	hCoV-19/Mexico/CHH_IBT_IMSS_2313/2021	EPI_ISL_3347629		2021-07-09	Chihuahua	60	Male		GK	AY.100
	hCoV-19/Mexico/CHH_IBT_IMSS_2314/2021	EPI_ISL_3347630		2021-07-10	Chihuahua	50	Male		GK	AY.100
	hCoV-19/Mexico/CHH_IBT_IMSS_2328/2021	EPI_ISL_3347640		2021-07-13	Chihuahua	29	Female		GK	AY.20
	hCoV-19/Mexico/CHH_IBT_IMSS_2329/2021	EPI_ISL_3347641		2021-07-13	Chihuahua	30	Male		GK	AY.100
	hCoV-19/Mexico/CHH_IBT_IMSS_2330/2021	EPI_ISL_3347949		2021-07-13	Chihuahua	26	Male		GK	AY.100
	hCoV-19/Mexico/CHH_IBT_IMSS_2331/2021	EPI_ISL_3347642		2021-07-12	Chihuahua	37	Female		GK	AY.26
	hCoV-19/Mexico/CHH_IBT_IMSS_2332/2021	EPI_ISL_3347643		2021-07-12	Chihuahua	36	Male		GK	AY.100
	hCoV-19/Mexico/CHH_IBT_IMSS_2343/2021	EPI_ISL_3347652		2021-07-12	Chihuahua	24	Female		GK	AY.100
	hCoV-19/Mexico/CHH_IBT_IMSS_2344/2021	EPI_ISL_3347510		2021-07-13	Chihuahua	19	Male		GK	B.1.617.2
	hCoV-19/Mexico/CHH_IBT_IMSS_2348/2021	EPI_ISL_3347655		2021-07-14	Chihuahua	32	Female		GK	AY.100
	hCoV-19/Mexico/CHH_IBT_IMSS_2349/2021	EPI_ISL_3347511		2021-07-14	Chihuahua	44	Male		GK	AY.100
	hCoV-19/Mexico/CHH_IBT_IMSS_2350/2021	EPI_ISL_3347656		2021-07-14	Chihuahua	56	Male		GK	AY.100
	hCoV-19/Mexico/CHH_IBT_IMSS_2351/2021	EPI_ISL_3347657		2021-07-14	Chihuahua	43	Male		GK	AY.100
	hCoV-19/Mexico/CHH_IBT_IMSS_2352/2021	EPI_ISL_3347658		2021-07-14	Chihuahua	40	Male		GK	AY.100
	hCoV-19/Mexico/CHH_IBT_IMSS_2353/2021	EPI_ISL_3347659		2021-07-14	Chihuahua	65	Female		GK	AY.100
	hCoV-19/Mexico/CHH_IBT_IMSS_2354/2021	EPI_ISL_3347660		2021-07-15	Chihuahua	64	Male		GK	AY.100
	hCoV-19/Mexico/CHH_IBT_IMSS_2355/2021	EPI_ISL_3347661		2021-07-15	Chihuahua	48	Female		GK	AY.3
	hCoV-19/Mexico/CHH_IBT_IMSS_2356/2021	EPI_ISL_3347662		2021-07-15	Chihuahua	13	Female		GK	AY.100
	hCoV-19/Mexico/CHH_IBT_IMSS_2357/2021	EPI_ISL_3347663		2021-07-12	Chihuahua	50	Female		GK	AY.100
	hCoV-19/Mexico/CHH_IBT_IMSS_2376/2021	EPI_ISL_3347671		2021-07-21	Chihuahua	25	Male		GK	AY.20
	hCoV-19/Mexico/CHH_IBT_IMSS_2377/2021	EPI_ISL_3347672		2021-07-22	Chihuahua	62	Male		GK	AY.3
	hCoV-19/Mexico/CHH_IBT_IMSS_2378/2021	EPI_ISL_3347673		2021-07-21	Chihuahua	40	Female		GK	AY.3
	hCoV-19/Mexico/CHH_IBT_IMSS_2379/2021	EPI_ISL_3347674		2021-07-21	Chihuahua	38	Male		GK	AY.100
	hCoV-19/Mexico/CHH_IBT_IMSS_2380/2021	EPI_ISL_3347675		2021-07-21	Chihuahua	21	Female		GK	AY.26
	hCoV-19/Mexico/CHH_IBT_IMSS_2783/2021	EPI_ISL_4006233		2021-08-06	Chihuahua	69	Female		GK	AY.100
	hCoV-19/Mexico/CHH_IBT_IMSS_2786/2021	EPI_ISL_4006236		2021-08-04	Chihuahua	53	Male		GK	AY.100
	hCoV-19/Mexico/CHH_IBT_IMSS_2802/2021	EPI_ISL_4006252		2021-08-05	Chihuahua	23	Female		GK	AY.100
	hCoV-19/Mexico/CHH_IBT_IMSS_2820/2021	EPI_ISL_4006270		2021-08-06	Chihuahua	41	Female		GK	AY.74
	hCoV-19/Mexico/CHH_IBT_IMSS_2821/2021	EPI_ISL_4006271		2021-08-07	Chihuahua	32	Male		GK	AY.74
	hCoV-19/Mexico/CHH_IBT_IMSS_2826/2021	EPI_ISL_4006276		2021-08-10	Chihuahua	26	Female		GK	AY.100
	hCoV-19/Mexico/CHH_IBT_IMSS_2827/2021	EPI_ISL_4006277		2021-08-10	Chihuahua	48	Male		GK	AY.20
	hCoV-19/Mexico/CHH_IBT_IMSS_2835/2021	EPI_ISL_4006285		2021-08-12	Chihuahua	28	Male		GK	AY.100
	hCoV-19/Mexico/CHH_IBT_IMSS_2836/2021	EPI_ISL_4006286		2021-08-12	Chihuahua	34	Male		GK	AY.100
	hCoV-19/Mexico/CHH_IBT_IMSS_2837/2021	EPI_ISL_4006287		2021-08-13	Chihuahua	41	Female		GK	AY.26
	hCoV-19/Mexico/CHH_IBT_IMSS_2856/2021	EPI_ISL_4006307		2021-08-20	Chihuahua	53	Male		GK	AY.26
	hCoV-19/Mexico/CHH_IBT_IMSS_3324/2021	EPI_ISL_4878597		2021-09-07	Chihuahua	37	Male		GK	AY.26
	hCoV-19/Mexico/CHH_IBT_IMSS_3325/2021	EPI_ISL_4878598		2021-09-07	Chihuahua	23	Female		GK	AY.20
	hCoV-19/Mexico/CHH_IBT_IMSS_3326/2021	EPI_ISL_4878599		2021-09-07	Chihuahua	27	Male		GK	AY.20
	hCoV-19/Mexico/CHH_IBT_IMSS_3327/2021	EPI_ISL_4878600		2021-09-07	Chihuahua	26	Male		GK	AY.20
	hCoV-19/Mexico/CHH_IBT_IMSS_3328/2021	EPI_ISL_4878601		2021-09-07	Chihuahua	27	Male		GK	AY.100
	hCoV-19/Mexico/CHH_IBT_IMSS_3329/2021	EPI_ISL_4878602		2021-09-07	Chihuahua	17	Male		GK	AY.20
	hCoV-19/Mexico/CHH_IBT_IMSS_3330/2021	EPI_ISL_4878603		2021-09-07	Chihuahua	48	Male		GK	AY.20
	hCoV-19/Mexico/CHH_IBT_IMSS_3337/2021	EPI_ISL_4878611		2021-09-08	Chihuahua	27	Male		GK	AY.103
	hCoV-19/Mexico/CHH_IBT_IMSS_3354/2021	EPI_ISL_4878630		2021-09-08	Chihuahua	49	Female		GK	AY.20
	hCoV-19/Mexico/CHH_IBT_IMSS_3355/2021	EPI_ISL_4878631		2021-09-09	Chihuahua	47	Male		GK	AY.20
	hCoV-19/Mexico/CHH_IBT_IMSS_3356/2021	EPI_ISL_4878632		2021-09-09	Chihuahua	72	Male		GK	AY.26
	hCoV-19/Mexico/CHH_IBT_IMSS_3357/2021	EPI_ISL_4878633		2021-09-09	Chihuahua	64	Female		GK	AY.74
	hCoV-19/Mexico/CHH_IBT_IMSS_3358/2021	EPI_ISL_4878634		2021-09-11	Chihuahua	57	Male		GK	AY.100
	hCoV-19/Mexico/CHH_IBT_IMSS_3359/2021	EPI_ISL_4878635		2021-09-11	Chihuahua	53	Female		GK	AY.113
	hCoV-19/Mexico/CHH_IBT_IMSS_3360/2021	EPI_ISL_4878636		2021-09-12	Chihuahua	20	Female		GK	AY.20
	hCoV-19/Mexico/CHH_IBT_IMSS_3361/2021	EPI_ISL_4878637		2021-09-12	Chihuahua	42	Male		GK	AY.20
	hCoV-19/Mexico/CHH_IBT_IMSS_3362/2021	EPI_ISL_4878638		2021-09-12	Chihuahua	23	Male		GK	AY.26
	hCoV-19/Mexico/CHH_IBT_IMSS_3363/2021	EPI_ISL_4878639		2021-09-12	Chihuahua	46	Male		GK	AY.100
	hCoV-19/Mexico/CHH_IBT_IMSS_3765/2021	EPI_ISL_5936973		2021-09-15	Chihuahua	13	Female		GK	AY.25
	hCoV-19/Mexico/CHH_IBT_IMSS_3766/2021	EPI_ISL_5936974		2021-09-15	Chihuahua	12	Male		GK	AY.25
	hCoV-19/Mexico/CHH_IBT_IMSS_3772/2021	EPI_ISL_5936601		2021-10-02	Chihuahua	35	Female		GK	AY.46.2
	hCoV-19/Mexico/CHH_IBT_IMSS_3773/2021	EPI_ISL_5936975		2021-10-03	Chihuahua	18	Male		GK	AY.26
	hCoV-19/Mexico/CHH_IBT_IMSS_3778/2021	EPI_ISL_5936976		2021-10-02	Chihuahua	60	Male		GK	AY.100
	hCoV-19/Mexico/CHH_IBT_IMSS_3779/2021	EPI_ISL_5936674		2021-09-28	Chihuahua	24	Female		GK	AY.100
	hCoV-19/Mexico/CHH_IBT_IMSS_3785/2021	EPI_ISL_5936589		2021-10-08	Chihuahua	54	Female		GK	AY.113
	hCoV-19/Mexico/CHH_IBT_IMSS_4183/2021	EPI_ISL_6863344		2021-11-01	Chihuahua	61	Female		GK	AY.100
	hCoV-19/Mexico/CHH_IBT_IMSS_4207/2021	EPI_ISL_6863369		2021-10-30	Chihuahua	34	Female		GK	AY.20
	hCoV-19/Mexico/CHH_IBT_IMSS_4208/2021	EPI_ISL_6863370		2021-10-30	Chihuahua	29	Male		GK	AY.20
	hCoV-19/Mexico/CHH_IBT_IMSS_4209/2021	EPI_ISL_6863371		2021-10-30	Chihuahua	66	Female		GK	AY.20
	hCoV-19/Mexico/CHH_IBT_IMSS_4210/2021	EPI_ISL_6863372		2021-10-28	Chihuahua	69	Female		GK	AY.26
	hCoV-19/Mexico/CHH_IBT_IMSS_4211/2021	EPI_ISL_6863373		2021-10-31	Chihuahua	77	Male		GK	AY.117
	hCoV-19/Mexico/CHH_IBT_IMSS_4212/2021	EPI_ISL_6863374		2021-10-29	Chihuahua	17	Female		GK	AY.20
	hCoV-19/Mexico/CHH_IBT_IMSS_4213/2021	EPI_ISL_6863375		2021-10-30	Chihuahua	58	Male		GK	AY.67
	hCoV-19/Mexico/CHH_IBT_IMSS_4214/2021	EPI_ISL_6863376		2021-11-01	Chihuahua	43	Female		GK	AY.100
	hCoV-19/Mexico/CHH_IBT_IMSS_4215/2021	EPI_ISL_6863377		2021-11-03	Chihuahua	46	Female		GK	AY.20
	hCoV-19/Mexico/CHH_IBT_IMSS_4216/2021	EPI_ISL_6863378		2021-11-03	Chihuahua	79	Female		GK	AY.113
	hCoV-19/Mexico/CHH_IBT_IMSS_4217/2021	EPI_ISL_6863379		2021-11-03	Chihuahua	74	Female		GK	AY.25
	hCoV-19/Mexico/CHH_IBT_IMSS_4218/2021	EPI_ISL_6863380		2021-11-01	Chihuahua	64	Male		GK	AY.100
	hCoV-19/Mexico/CHH_IBT_IMSS_4219/2021	EPI_ISL_6863381		2021-11-01	Chihuahua	77	Male		GK	AY.100
	hCoV-19/Mexico/CHH_IBT_IMSS_4220/2021	EPI_ISL_6863382		2021-11-03	Chihuahua	40	Female		GK	AY.113
	hCoV-19/Mexico/CHH_IBT_IMSS_4221/2021	EPI_ISL_6863383		2021-11-03	Chihuahua	25	Female		GK	AY.100
	hCoV-19/Mexico/CHH_IBT_IMSS_4222/2021	EPI_ISL_6863384		2021-11-03	Chihuahua	92	Female		GK	AY.26
	hCoV-19/Mexico/CHH_IBT_IMSS_4223/2021	EPI_ISL_6863385		2021-11-03	Chihuahua	78	Female		GK	AY.20
	hCoV-19/Mexico/CHH_IBT_IMSS_4224/2021	EPI_ISL_6863386		2021-11-03	Chihuahua	59	Female		GK	AY.100
	hCoV-19/Mexico/CHH_IBT_IMSS_4225/2021	EPI_ISL_6863387		2021-11-03	Chihuahua	64	Female		GK	AY.100
	hCoV-19/Mexico/CHH_IBT_IMSS_4226/2021	EPI_ISL_6863388		2021-11-01	Chihuahua	60	Female		GK	AY.20
	hCoV-19/Mexico/CHH_IBT_IMSS_4227/2021	EPI_ISL_6863389		2021-11-01	Chihuahua	82	Female		GK	AY.117
	hCoV-19/Mexico/CHH_IBT_IMSS_4228/2021	EPI_ISL_6863390		2021-11-02	Chihuahua	32	Female		GK	AY.20
	hCoV-19/Mexico/CHH_IBT_IMSS_4229/2021	EPI_ISL_6863391		2021-11-03	Chihuahua	33	Female		GK	AY.20
	hCoV-19/Mexico/CHH_IBT_IMSS_4230/2021	EPI_ISL_6863392		2021-11-03	Chihuahua	30	Male		GK	AY.20
	hCoV-19/Mexico/CHH_IBT_IMSS_4231/2021	EPI_ISL_6863393		2021-11-03	Chihuahua	62	Male		GK	AY.113
	hCoV-19/Mexico/CHH_IBT_IMSS_4238/2021	EPI_ISL_6863401		2021-10-28	Chihuahua	78	Female		GK	AY.100
	hCoV-19/Mexico/CHH_IBT_IMSS_4239/2021	EPI_ISL_6863402		2021-10-28	Chihuahua	44	Female		GK	AY.103
	hCoV-19/Mexico/CHH_IBT_IMSS_4240/2021	EPI_ISL_6863403		2021-11-01	Chihuahua	46	Female		GK	AY.100
	hCoV-19/Mexico/CHH_IBT_IMSS_4241/2021	EPI_ISL_6863404		2021-10-29	Chihuahua	49	Male		GK	AY.100
	hCoV-19/Mexico/CHH_IBT_IMSS_4242/2021	EPI_ISL_6863405		2021-11-03	Chihuahua	74	Female		GK	AY.39
	hCoV-19/Mexico/CHH_IBT_IMSS_4243/2021	EPI_ISL_6863406		2021-11-03	Chihuahua	36	Female		GK	AY.100
	hCoV-19/Mexico/CHH_IBT_IMSS_4244/2021	EPI_ISL_6863407		2021-11-02	Chihuahua	22	Female		GK	AY.20
	hCoV-19/Mexico/CHH_IBT_IMSS_4245/2021	EPI_ISL_6863408		2021-11-03	Chihuahua	69	Female		GK	AY.39
	hCoV-19/Mexico/CHH_IBT_IMSS_4246/2021	EPI_ISL_6863409		2021-11-03	Chihuahua	49	Female		GK	AY.113
	hCoV-19/Mexico/CHH_IBT_IMSS_4247/2021	EPI_ISL_6863410		2021-11-04	Chihuahua	47	Female		GK	AY.39
	hCoV-19/Mexico/CHH_IBT_IMSS_4248/2021	EPI_ISL_6863411		2021-11-04	Chihuahua	74	Female		GK	AY.39
	hCoV-19/Mexico/CHH_IBT_IMSS_4249/2021	EPI_ISL_6863412		2021-11-05	Chihuahua	50	Male		GK	AY.3
	hCoV-19/Mexico/CHH_IBT_IMSS_4250/2021	EPI_ISL_6863413		2021-11-05	Chihuahua	80	Male		GK	AY.100
	hCoV-19/Mexico/CHH_IBT_IMSS_4251/2021	EPI_ISL_6863414		2021-11-05	Chihuahua	54	Female		GK	AY.3
	hCoV-19/Mexico/CHH_IBT_IMSS_4252/2021	EPI_ISL_6863415		2021-11-05	Chihuahua	69	Male		GK	AY.3
	hCoV-19/Mexico/CHH_IBT_IMSS_4253/2021	EPI_ISL_6863416		2021-11-05	Chihuahua	72	Male		GK	AY.39
	hCoV-19/Mexico/CHH_IBT_IMSS_4256/2021	EPI_ISL_6863419		2021-11-08	Chihuahua	38	Female		GK	AY.39
	hCoV-19/Mexico/CHH_IBT_IMSS_4257/2021	EPI_ISL_6863420		2021-11-09	Chihuahua	75	Female		GK	AY.3
	hCoV-19/Mexico/CHH_IBT_IMSS_4258/2021	EPI_ISL_6863421		2021-11-09	Chihuahua	24	Male		GK	AY.3
	hCoV-19/Mexico/CHH_IBT_IMSS_4259/2021	EPI_ISL_6863422		2021-11-09	Chihuahua	71	Female		GK	AY.43
	hCoV-19/Mexico/CHH_IBT_IMSS_4260/2021	EPI_ISL_6863423		2021-11-09	Chihuahua	74	Male		GK	AY.100
	hCoV-19/Mexico/CHH_IBT_IMSS_4261/2021	EPI_ISL_6863424		2021-11-09	Chihuahua	47	Female		GK	AY.39
	hCoV-19/Mexico/CHH_IBT_IMSS_4262/2021	EPI_ISL_6863425		2021-11-09	Chihuahua	58	Male		GK	AY.3
	hCoV-19/Mexico/CHH_INER_IMSS_1673/2021	EPI_ISL_3556944		2021-07-26	Chihuahua	63	Female		GK	B.1.617.2
	hCoV-19/Mexico/CHH_INER_IMSS_1675/2021	EPI_ISL_3556946		2021-07-23	Chihuahua	28	Male		GK	AY.26
	hCoV-19/Mexico/CHH_INER_IMSS_1676/2021	EPI_ISL_3556947		2021-07-23	Chihuahua	28	Female		GK	AY.26
	hCoV-19/Mexico/CHH_INER_IMSS_1677/2021	EPI_ISL_3556948		2021-07-25	Chihuahua	58	Male		GK	AY.3
	hCoV-19/Mexico/CHH_INER_IMSS_1678/2021	EPI_ISL_3556949		2021-07-26	Chihuahua	24	Female		GK	B.1.617.2
	hCoV-19/Mexico/CHH_INER_IMSS_1691/2021	EPI_ISL_3556962		2021-07-28	Chihuahua	34	Female		GK	AY.100
	hCoV-19/Mexico/CHH_INER_IMSS_2036/2021	EPI_ISL_4299459		2021-08-19	Chihuahua	28	Male		GK	AY.20
	hCoV-19/Mexico/CHH_INER_IMSS_2064/2021	EPI_ISL_4299487		2021-08-18	Chihuahua	42	Female		G	AY.26
	hCoV-19/Mexico/CHH_INER_IMSS_2065/2021	EPI_ISL_4299488		2021-08-19	Chihuahua	47	Male		GK	B.1.617.2
	hCoV-19/Mexico/CHH_INER_IMSS_2066/2021	EPI_ISL_4299489		2021-08-19	Chihuahua	27	Female		GK	AY.26
	hCoV-19/Mexico/CHH_INER_IMSS_2067/2021	EPI_ISL_4299490		2021-08-19	Chihuahua	51	Female		GK	AY.20
	hCoV-19/Mexico/CHH_INER_IMSS_2068/2021	EPI_ISL_4299491		2021-08-22	Chihuahua	32	Female		GK	AY.26
	hCoV-19/Mexico/CHH_INER_IMSS_2069/2021	EPI_ISL_4299492		2021-08-21	Chihuahua	49	Female		GK	AY.26
	hCoV-19/Mexico/CHH_INER_IMSS_2070/2021	EPI_ISL_4299493		2021-08-21	Chihuahua	27	Female		GK	AY.26
	hCoV-19/Mexico/CHH_INER_IMSS_2071/2021	EPI_ISL_4299494		2021-08-22	Chihuahua	23	Female		GK	AY.20
	hCoV-19/Mexico/CHH_INER_IMSS_2072/2021	EPI_ISL_4299495		2021-08-21	Chihuahua	25	Female		GK	AY.20
	hCoV-19/Mexico/CHH_INER_IMSS_2090/2021	EPI_ISL_4299513		2021-08-19	Chihuahua	31	Male		GK	AY.26
	hCoV-19/Mexico/CHH_INER_IMSS_2364/2021	EPI_ISL_5193919		2021-09-17	Chihuahua	47	Male		GK	AY.20
	hCoV-19/Mexico/CHH_INER_IMSS_2365/2021	EPI_ISL_5194243		2021-09-17	Chihuahua	28	Male		GK	B.1.617.2
	hCoV-19/Mexico/CHH_INER_IMSS_2366/2021	EPI_ISL_5194244		2021-09-17	Chihuahua	41	Male		GK	AY.20
	hCoV-19/Mexico/CHH_INER_IMSS_2367/2021	EPI_ISL_5193906		2021-09-17	Chihuahua	36	Male		GK	AY.20
	hCoV-19/Mexico/CHH_INER_IMSS_2368/2021	EPI_ISL_5194245		2021-09-17	Chihuahua	43	Female		GK	AY.20
	hCoV-19/Mexico/CHH_INER_IMSS_2369/2021	EPI_ISL_5194246		2021-09-17	Chihuahua	19	Male		GK	AY.20
	hCoV-19/Mexico/CHH_INER_IMSS_2370/2021	EPI_ISL_5194247		2021-09-17	Chihuahua	83	Male		GK	AY.20
	hCoV-19/Mexico/CHH_INER_IMSS_2371/2021	EPI_ISL_5194248		2021-09-17	Chihuahua	21	Female		GK	AY.3
	hCoV-19/Mexico/CHH_INER_IMSS_2372/2021	EPI_ISL_5194249		2021-09-17	Chihuahua	21	Male		GK	AY.20
	hCoV-19/Mexico/CHH_INER_IMSS_2373/2021	EPI_ISL_5194250		2021-09-16	Chihuahua	29	Female		GK	AY.26
	hCoV-19/Mexico/CHH_INER_IMSS_2374/2021	EPI_ISL_5194251		2021-09-17	Chihuahua	62	Male		GK	AY.113
	hCoV-19/Mexico/CHH_INER_IMSS_2375/2021	EPI_ISL_5193943		2021-09-17	Chihuahua	29	Female		GK	AY.20
	hCoV-19/Mexico/CHH_INER_IMSS_2376/2021	EPI_ISL_5194252		2021-09-14	Chihuahua	16	Male		GK	AY.113
	hCoV-19/Mexico/CHH_INER_IMSS_2396/2021	EPI_ISL_5194253		2021-09-18	Chihuahua	28	Female		GK	B.1.617.2
	hCoV-19/Mexico/CHH_INER_IMSS_2397/2021	EPI_ISL_5194254		2021-09-20	Chihuahua	21	Male		GK	AY.20
	hCoV-19/Mexico/CHH_INER_IMSS_2398/2021	EPI_ISL_5194255		2021-09-20	Chihuahua	45	Female		GK	AY.20
	hCoV-19/Mexico/CHH_INER_IMSS_2442/2021	EPI_ISL_5194256		2021-09-20	Chihuahua	22	Male		GK	AY.113
	hCoV-19/Mexico/CHH_INER_IMSS_2443/2021	EPI_ISL_5194257		2021-09-17	Chihuahua	73	Male		GK	AY.20
	hCoV-19/Mexico/CHH_INER_IMSS_2748/2021	EPI_ISL_6227187		2021-10-12	Chihuahua	66	Male		GK	AY.20
	hCoV-19/Mexico/CHH_INER_IMSS_2749/2021	EPI_ISL_6227188		2021-10-11	Chihuahua	83	Male		GK	AY.26
	hCoV-19/Mexico/CHH_INER_IMSS_2796/2021	EPI_ISL_6227227		2021-10-19	Chihuahua	56	Female		GK	AY.26
	hCoV-19/Mexico/CHH_INER_IMSS_2797/2021	EPI_ISL_6227228		2021-10-19	Chihuahua	68	Male		GK	AY.26
	hCoV-19/Mexico/CHH_INER_IMSS_2798/2021	EPI_ISL_6227229		2021-10-18	Chihuahua	43	Female		GK	B.1.617.2
	hCoV-19/Mexico/CHH_INER_IMSS_2799/2021	EPI_ISL_6227230		2021-10-18	Chihuahua	39	Female		GK	AY.3
	hCoV-19/Mexico/CHH_INER_IMSS_2800/2021	EPI_ISL_6227231		2021-10-13	Chihuahua	91	Male		GK	AY.44
	hCoV-19/Mexico/CHH_INER_IMSS_2801/2021	EPI_ISL_6227232		2021-10-13	Chihuahua	56	Female		GK	AY.20
	hCoV-19/Mexico/CHH_INER_IMSS_2802/2021	EPI_ISL_6227233		2021-10-13	Chihuahua	69	Female		GK	AY.20
	hCoV-19/Mexico/CHH_LANGEBIO_IMSS_1926/2021	EPI_ISL_3805448		2021-08-02	Chihuahua	36	Female		GK	AY.3
	hCoV-19/Mexico/CHH_LANGEBIO_IMSS_1927/2021	EPI_ISL_3805437		2021-08-02	Chihuahua	29	Male		GK	AY.100
	hCoV-19/Mexico/CHH_LANGEBIO_IMSS_1928/2021	EPI_ISL_3805474		2021-07-30	Chihuahua	59	Female		GK	AY.100
	hCoV-19/Mexico/CHH_LANGEBIO_IMSS_1929/2021	EPI_ISL_3805478		2021-08-01	Chihuahua	65	Female		GK	AY.53
	hCoV-19/Mexico/CHH_LANGEBIO_IMSS_1930/2021	EPI_ISL_3805476		2021-07-29	Chihuahua	62	Male		GK	AY.100
	hCoV-19/Mexico/CHH_LANGEBIO_IMSS_1931/2021	EPI_ISL_3805430		2021-08-04	Chihuahua	23	Female		GK	AY.100
	hCoV-19/Mexico/CHH_LANGEBIO_IMSS_1932/2021	EPI_ISL_3805449		2021-08-03	Chihuahua	37	Female		GK	AY.100
	hCoV-19/Mexico/CHH_LANGEBIO_IMSS_1934/2021	EPI_ISL_3805442		2021-08-03	Chihuahua	32	Male		GK	AY.100
	hCoV-19/Mexico/CHH_LANGEBIO_IMSS_1942/2021	EPI_ISL_3805477		2021-07-29	Chihuahua	65	Female		GK	AY.100
	hCoV-19/Mexico/CHH_LANGEBIO_IMSS_1943/2021	EPI_ISL_3805473		2021-07-30	Chihuahua	56	Male		GK	AY.100
	hCoV-19/Mexico/CHH_LANGEBIO_IMSS_1944/2021	EPI_ISL_3805482		2021-07-30	Chihuahua	77	Male		GK	AY.42
	hCoV-19/Mexico/CHH_LANGEBIO_IMSS_2212/2021	EPI_ISL_4549865		2021-08-12	Chihuahua	23	Female		GK	AY.26
	hCoV-19/Mexico/CHH_LANGEBIO_IMSS_2224/2021	EPI_ISL_4549866		2021-08-25	Chihuahua	78	Male		GK	AY.20
	hCoV-19/Mexico/CHH_LANGEBIO_IMSS_2238/2021	EPI_ISL_4549867		2021-08-30	Chihuahua	21	Female		GK	AY.113
	hCoV-19/Mexico/CHH_LANGEBIO_IMSS_2239/2021	EPI_ISL_4549868		2021-08-30	Chihuahua	45	Female		GK	AY.103
	hCoV-19/Mexico/CHH_LANGEBIO_IMSS_2263/2021	EPI_ISL_4549869		2021-08-26	Chihuahua	64	Female		GK	AY.26
	hCoV-19/Mexico/CHH_LANGEBIO_IMSS_2264/2021	EPI_ISL_4549870		2021-08-29	Chihuahua	37	Female		GK	AY.20
	hCoV-19/Mexico/CHH_LANGEBIO_IMSS_2265/2021	EPI_ISL_4549871		2021-08-29	Chihuahua	26	Female		GK	AY.20
	hCoV-19/Mexico/CHH_LANGEBIO_IMSS_2266/2021	EPI_ISL_4549872		2021-08-30	Chihuahua	40	Female		GK	B.1.617.2
	hCoV-19/Mexico/CHH_LANGEBIO_IMSS_2267/2021	EPI_ISL_4549873		2021-08-31	Chihuahua	25	Male		GK	AY.26
	hCoV-19/Mexico/CHH_LANGEBIO_IMSS_2268/2021	EPI_ISL_4549874		2021-08-31	Chihuahua	15	Male		GK	AY.74
	hCoV-19/Mexico/CHH_LANGEBIO_IMSS_2655/2021	EPI_ISL_5850674		2021-09-23	Chihuahua	33	Male		GK	AY.100
	hCoV-19/Mexico/CHH_LANGEBIO_IMSS_2656/2021	EPI_ISL_5850675		2021-09-23	Chihuahua	36	Female		GK	AY.26
	hCoV-19/Mexico/CHH_LANGEBIO_IMSS_2657/2021	EPI_ISL_5850676		2021-09-23	Chihuahua	67	Female		GK	AY.26
	hCoV-19/Mexico/CHH_LANGEBIO_IMSS_2658/2021	EPI_ISL_5850677		2021-09-23	Chihuahua	50	Female		GK	AY.20
	hCoV-19/Mexico/CHH_LANGEBIO_IMSS_2659/2021	EPI_ISL_5850678		2021-09-23	Chihuahua	70	Female		GK	AY.20
	hCoV-19/Mexico/CHH_LANGEBIO_IMSS_2660/2021	EPI_ISL_5850679		2021-09-23	Chihuahua	27	Male		GK	AY.20
	hCoV-19/Mexico/CHH_LANGEBIO_IMSS_2661/2021	EPI_ISL_5850680		2021-09-21	Chihuahua	72	Female		GK	AY.113
	hCoV-19/Mexico/CHH_LANGEBIO_IMSS_2662/2021	EPI_ISL_5850681		2021-09-21	Chihuahua	26	Female		GK	AY.113
	hCoV-19/Mexico/CHH_LANGEBIO_IMSS_2663/2021	EPI_ISL_5850682		2021-09-21	Chihuahua	21	Male		GK	AY.20
	hCoV-19/Mexico/CHH_LANGEBIO_IMSS_2664/2021	EPI_ISL_5850683		2021-09-21	Chihuahua	22	Male		GK	AY.20
	hCoV-19/Mexico/CHH_LANGEBIO_IMSS_2665/2021	EPI_ISL_5850684		2021-09-21	Chihuahua	27	Female		GK	AY.20
	hCoV-19/Mexico/CHH_LANGEBIO_IMSS_2666/2021	EPI_ISL_5850685		2021-09-21	Chihuahua	41	Male		GK	AY.100
	hCoV-19/Mexico/CHH_LANGEBIO_IMSS_2667/2021	EPI_ISL_5850686		2021-09-22	Chihuahua	30	Female		GK	AY.3
	hCoV-19/Mexico/CHH_LANGEBIO_IMSS_2668/2021	EPI_ISL_5850687		2021-09-21	Chihuahua	72	Female		GK	AY.113
	hCoV-19/Mexico/CHH_LANGEBIO_IMSS_2669/2021	EPI_ISL_5850688		2021-09-22	Chihuahua	42	Female		GK	AY.3
	hCoV-19/Mexico/CHH_LANGEBIO_IMSS_2728/2021	EPI_ISL_5850747		2021-09-27	Chihuahua	78	Female		GK	AY.100
	hCoV-19/Mexico/CHH_LANGEBIO_IMSS_2729/2021	EPI_ISL_5850748		2021-09-27	Chihuahua	80	Male		GK	AY.100
	hCoV-19/Mexico/CHH_LANGEBIO_IMSS_2730/2021	EPI_ISL_5850749		2021-09-27	Chihuahua	51	Male		GK	AY.3
	hCoV-19/Mexico/CHH_LANGEBIO_IMSS_2731/2021	EPI_ISL_5850750		2021-09-24	Chihuahua	73	Male		GK	AY.113
	hCoV-19/Mexico/CHH_LANGEBIO_IMSS_2732/2021	EPI_ISL_5850751		2021-09-27	Chihuahua	70	Female		GK	AY.20
	hCoV-19/Mexico/CHH_LANGEBIO_IMSS_2733/2021	EPI_ISL_5850752		2021-09-26	Chihuahua	32	Male		GK	AY.26
	hCoV-19/Mexico/CHH_LANGEBIO_IMSS_2734/2021	EPI_ISL_5850753		2021-09-26	Chihuahua	28	Female		GK	AY.26
	hCoV-19/Mexico/CHH_LANGEBIO_IMSS_2735/2021	EPI_ISL_5850754		2021-09-27	Chihuahua	30	Female		GK	AY.25
	hCoV-19/Mexico/CHH_LANGEBIO_IMSS_2736/2021	EPI_ISL_5850755		2021-09-27	Chihuahua	77	Female		GK	AY.20
	hCoV-19/Mexico/CHH_LANGEBIO_IMSS_2737/2021	EPI_ISL_5850756		2021-09-27	Chihuahua	62	Female		GK	AY.26
	hCoV-19/Mexico/CHH_LANGEBIO_IMSS_3146/2021	EPI_ISL_6775342		2021-10-25	Chihuahua	65	Male		GK	AY.3
	hCoV-19/Mexico/CHH_LANGEBIO_IMSS_3147/2021	EPI_ISL_6775343		2021-10-25	Chihuahua	68	Female		GK	AY.26
	hCoV-19/Mexico/CHH_LANGEBIO_IMSS_3163/2021	EPI_ISL_6775743		2021-10-20	Chihuahua	28	Female		GK	AY.3
	hCoV-19/Mexico/CHH_LANGEBIO_IMSS_3164/2021	EPI_ISL_6775744		2021-10-20	Chihuahua	33	Male		GK	AY.113
	hCoV-19/Mexico/CHH_LANGEBIO_IMSS_3165/2021	EPI_ISL_6775745		2021-10-20	Chihuahua	38	Male		GK	B.1.617.2
	hCoV-19/Mexico/CHH_LANGEBIO_IMSS_3184/2021	EPI_ISL_6775344		2021-10-27	Chihuahua	59	Female		GK	AY.20
	hCoV-19/Mexico/CHH_LANGEBIO_IMSS_3185/2021	EPI_ISL_6775746		2021-10-26	Chihuahua	85	Male		GK	AY.26
	hCoV-19/Mexico/CHH_LANGEBIO_IMSS_3186/2021	EPI_ISL_6775747		2021-10-26	Chihuahua	37	Female		GK	AY.26
	hCoV-19/Mexico/CHH_LANGEBIO_IMSS_67053-NC/2021	EPI_ISL_2969894		2021-06-09	Chihuahua	41	Female		G	AY.26
	hCoV-19/Mexico/CHH-INER_IMSS_1409/2021	EPI_ISL_3155419		2021-07-02	Chihuahua	31	Male		GK	B.1.617.2
	hCoV-19/Mexico/CHH-INER_IMSS_1410/2021	EPI_ISL_3155420		2021-07-05	Chihuahua	63	Female		GK	B.1.617.2
	hCoV-19/Mexico/CHH-INER_IMSS_1411/2021	EPI_ISL_3155421		2021-07-03	Chihuahua	23	Female		GK	B.1.617.2
	hCoV-19/Mexico/CHH-INER_IMSS_1412/2021	EPI_ISL_3155422		2021-07-01	Chihuahua	53	Male		GK	B.1.617.2
	hCoV-19/Mexico/CHH-INER_IMSS_1414/2021	EPI_ISL_3155424		2021-06-30	Chihuahua	48	Female		GK	B.1.617.2
	hCoV-19/Mexico/CHH-INER_IMSS_1415/2021	EPI_ISL_3155425		2021-07-05	Chihuahua	36	Male		GK	B.1.617.2
	hCoV-19/Mexico/CHH-INER_IMSS_1416/2021	EPI_ISL_3155426		2021-07-05	Chihuahua	51	Male		GK	B.1.617.2
	hCoV-19/Mexico/CHH-INER_IMSS_1417/2021	EPI_ISL_3155427		2021-07-05	Chihuahua	34	Female		GK	B.1.617.2
	hCoV-19/Mexico/CHH-INER_IMSS_1429/2021	EPI_ISL_3155439		2021-07-08	Chihuahua	35	Female		GK	B.1.617.2
	hCoV-19/Mexico/CHH-LANGEBIO_IMSS_1374/2021	EPI_ISL_2942503		2021-06-20	Chihuahua	58	Female		G	AY.100
	hCoV-19/Mexico/CHH-LANGEBIO_IMSS_1384/2021	EPI_ISL_2942512		2021-06-24	Chihuahua	33	Male		G	AY.100
	hCoV-19/Mexico/CHH-LANGEBIO_IMSS_1663/2021	EPI_ISL_2942760		2021-06-20	Chihuahua	19	Male		G	AY.100
	hCoV-19/Mexico/CHH-LANGEBIO_IMSS_1682/2021	EPI_ISL_2942773		2021-06-27	Chihuahua	46	Female		G	AY.26
	hCoV-19/Mexico/CHH-LANGEBIO_IMSS_1687/2021	EPI_ISL_2942777		2021-06-29	Chihuahua	49	Female		G	AY.100
	hCoV-19/Mexico/CHH-LANGEBIO_IMSS_1692/2021	EPI_ISL_2942781		2021-06-22	Chihuahua	30	Female		G	AY.100
	hCoV-19/Mexico/CHH-LANGEBIO_IMSS_1693/2021	EPI_ISL_2942782		2021-06-29	Chihuahua	48	Female		G	AY.100
	hCoV-19/Mexico/CHH-LANGEBIO_IMSS_1694/2021	EPI_ISL_2942783		2021-06-29	Chihuahua	41	Female		G	AY.100
	hCoV-19/Mexico/CHH-LANGEBIO_IMSS_1695/2021	EPI_ISL_2942784		2021-06-30	Chihuahua	45	Female		G	AY.100
	hCoV-19/Mexico/CHH-LANGEBIO_IMSS_1698/2021	EPI_ISL_2942787		2021-06-29	Chihuahua	44	Female		G	AY.100
	hCoV-19/Mexico/CHH-LANGEBIO_IMSS_1699/2021	EPI_ISL_2942788		2021-07-01	Chihuahua	48	Female		G	AY.100
	hCoV-19/Mexico/CHP_IBT_IMSS_01195334/NC/2021	EPI_ISL_5936563		2021-10-06	Chiapas	56	Female		GK	AY.113
	hCoV-19/Mexico/CHP_IBT_IMSS_1207312/NC/2021	EPI_ISL_6863561		2021-11-04	Chiapas	23	Male		GK	AY.100
	hCoV-19/Mexico/CHP_IBT_IMSS_1209534/NC/2021	EPI_ISL_6863684		2021-11-08	Chiapas	77	Female		GK	AY.101
	hCoV-19/Mexico/CHP_IBT_IMSS_2406/2021	EPI_ISL_3347710		2021-07-14	Chiapas	51	Female		GK	AY.26
	hCoV-19/Mexico/CHP_IBT_IMSS_2407/2021	EPI_ISL_3347522		2021-07-14	Chiapas	21	Male		GK	AY.100
	hCoV-19/Mexico/CHP_IBT_IMSS_2408/2021	EPI_ISL_3347523		2021-07-14	Chiapas	51	Female		GK	AY.100
	hCoV-19/Mexico/CHP_IBT_IMSS_2409/2021	EPI_ISL_3347524		2021-07-14	Chiapas	42	Male		GK	AY.100
	hCoV-19/Mexico/CHP_IBT_IMSS_2410/2021	EPI_ISL_3347525		2021-07-14	Chiapas	43	Male		GK	AY.100
	hCoV-19/Mexico/CHP_IBT_IMSS_2452/2021	EPI_ISL_3347745		2021-07-19	Chiapas	36	Female		GK	AY.20
	hCoV-19/Mexico/CHP_IBT_IMSS_2453/2021	EPI_ISL_3347746		2021-07-19	Chiapas	29	Male		GK	AY.113
	hCoV-19/Mexico/CHP_IBT_IMSS_2454/2021	EPI_ISL_3347747		2021-07-19	Chiapas	44	Female		GK	AY.113
	hCoV-19/Mexico/CHP_IBT_IMSS_2455/2021	EPI_ISL_3347748		2021-07-19	Chiapas	31	Male		GK	AY.113
	hCoV-19/Mexico/CHP_IBT_IMSS_2457/2021	EPI_ISL_3347749		2021-07-19	Chiapas	27	Male		GK	AY.113
	hCoV-19/Mexico/CHP_IBT_IMSS_2458/2021	EPI_ISL_3347750		2021-07-19	Chiapas	27	Female		GK	AY.113
	hCoV-19/Mexico/CHP_IBT_IMSS_2459/2021	EPI_ISL_3347751		2021-07-19	Chiapas	20	Male		GK	AY.113
	hCoV-19/Mexico/CHP_IBT_IMSS_2460/2021	EPI_ISL_3347526		2021-07-20	Chiapas	29	Male		GK	AY.100
	hCoV-19/Mexico/CHP_IBT_IMSS_2461/2021	EPI_ISL_3347752		2021-07-19	Chiapas	25	Male		GK	AY.113
	hCoV-19/Mexico/CHP_IBT_IMSS_2462/2021	EPI_ISL_3347920		2021-07-19	Chiapas	20	Male		GK	AY.20
	hCoV-19/Mexico/CHP_IBT_IMSS_2486/2021	EPI_ISL_3347921		2021-07-21	Chiapas	83	Male		GK	AY.122
	hCoV-19/Mexico/CHP_IBT_IMSS_2517/2021	EPI_ISL_3347528		2021-07-21	Chiapas	25	Male		GK	AY.113
	hCoV-19/Mexico/CHP_IBT_IMSS_2529/2021	EPI_ISL_3347797		2021-07-19	Chiapas	33	Female		GK	AY.122
	hCoV-19/Mexico/CHP_IBT_IMSS_2532/2021	EPI_ISL_3347798		2021-07-22	Chiapas	75	Male		GK	AY.26
	hCoV-19/Mexico/CHP_IBT_IMSS_2533/2021	EPI_ISL_3347799		2021-07-22	Chiapas	70	Male		GK	AY.26
	hCoV-19/Mexico/CHP_IBT_IMSS_2860/2021	EPI_ISL_4006379		2021-08-11	Chiapas	75	Female		GK	AY.100
	hCoV-19/Mexico/CHP_IBT_IMSS_2861/2021	EPI_ISL_4006380		2021-08-11	Chiapas	31	Male		GK	AY.100
	hCoV-19/Mexico/CHP_IBT_IMSS_2862/2021	EPI_ISL_4006381		2021-08-11	Chiapas	59	Male		GK	AY.100
	hCoV-19/Mexico/CHP_IBT_IMSS_2879/2021	EPI_ISL_4006398		2021-08-12	Chiapas	29	Female		GK	AY.113
	hCoV-19/Mexico/CHP_IBT_IMSS_2880/2021	EPI_ISL_4006399		2021-08-12	Chiapas	34	Male		GK	AY.113
	hCoV-19/Mexico/CHP_IBT_IMSS_2881/2021	EPI_ISL_4006400		2021-08-12	Chiapas	46	Male		GK	AY.113
	hCoV-19/Mexico/CHP_IBT_IMSS_2882/2021	EPI_ISL_4006401		2021-08-12	Chiapas	40	Female		GK	AY.113
	hCoV-19/Mexico/CHP_IBT_IMSS_2978/2021	EPI_ISL_4006497		2021-08-18	Chiapas	35	Female		GK	AY.26
	hCoV-19/Mexico/CHP_IBT_IMSS_2979/2021	EPI_ISL_4006498		2021-08-18	Chiapas	79	Male		GK	AY.113
	hCoV-19/Mexico/CHP_IBT_IMSS_3029/2021	EPI_ISL_4006548		2021-08-18	Chiapas	35	Female		GK	AY.122
	hCoV-19/Mexico/CHP_IBT_IMSS_3030/2021	EPI_ISL_4006549		2021-08-18	Chiapas	51	Female		GK	AY.26
	hCoV-19/Mexico/CHP_IBT_IMSS_3031/2021	EPI_ISL_4006550		2021-08-18	Chiapas	54	Female		GK	AY.26
	hCoV-19/Mexico/CHP_IBT_IMSS_3032/2021	EPI_ISL_4006551		2021-08-19	Chiapas	25	Male		GK	AY.113
	hCoV-19/Mexico/CHP_IBT_IMSS_3033/2021	EPI_ISL_4006552		2021-08-19	Chiapas	73	Male		GK	AY.100
	hCoV-19/Mexico/CHP_IBT_IMSS_3034/2021	EPI_ISL_4006553		2021-08-19	Chiapas	55	Female		GK	AY.113
	hCoV-19/Mexico/CHP_IBT_IMSS_3035/2021	EPI_ISL_4006554		2021-08-19	Chiapas	64	Female		GK	AY.113
	hCoV-19/Mexico/CHP_IBT_IMSS_3036/2021	EPI_ISL_4006555		2021-08-19	Chiapas	32	Male		GK	AY.113
	hCoV-19/Mexico/CHP_IBT_IMSS_3371/2021	EPI_ISL_4878705		2021-09-06	Chiapas	26	Female		GK	AY.113
	hCoV-19/Mexico/CHP_IBT_IMSS_3372/2021	EPI_ISL_4878706		2021-09-07	Chiapas	70	Female		GK	AY.26
	hCoV-19/Mexico/CHP_IBT_IMSS_3391/2021	EPI_ISL_4879047		2021-09-08	Chiapas	55	Female		GK	AY.48
	hCoV-19/Mexico/CHP_IBT_IMSS_3392/2021	EPI_ISL_4879058		2021-09-08	Chiapas	77	Female		GK	AY.100
	hCoV-19/Mexico/CHP_IBT_IMSS_3394/2021	EPI_ISL_4878723		2021-09-07	Chiapas	76	Male		GK	AY.113
	hCoV-19/Mexico/CHP_IBT_IMSS_3443/2021	EPI_ISL_4879042		2021-09-10	Chiapas	14	Female		GK	AY.100
	hCoV-19/Mexico/CHP_IBT_IMSS_3444/2021	EPI_ISL_4878768		2021-09-10	Chiapas	1	Male		GK	AY.26
	hCoV-19/Mexico/CHP_IBT_IMSS_3445/2021	EPI_ISL_4879043		2021-09-10	Chiapas	30	Male		GK	AY.100
	hCoV-19/Mexico/CHP_IBT_IMSS_3446/2021	EPI_ISL_4878769		2021-09-09	Chiapas	45	Female		GK	AY.26
	hCoV-19/Mexico/CHP_IBT_IMSS_3447/2021	EPI_ISL_4878770		2021-09-10	Chiapas	71	Female		GK	AY.75
	hCoV-19/Mexico/CHP_IBT_IMSS_3464/2021	EPI_ISL_4879044		2021-09-17	Chiapas	63	Male		GK	AY.100
	hCoV-19/Mexico/CHP_IBT_IMSS_3514/2021	EPI_ISL_4879045		2021-09-17	Chiapas	17	Female		GK	AY.100
	hCoV-19/Mexico/CHP_IBT_IMSS_3520/2021	EPI_ISL_4879046		2021-09-17	Chiapas	67	Female		GK	AY.100
	hCoV-19/Mexico/CHP_IBT_IMSS_3818/2021	EPI_ISL_5936977		2021-10-03	Chiapas	26	Male		GK	AY.113
	hCoV-19/Mexico/CHP_IBT_IMSS_3822/2021	EPI_ISL_5936978		2021-10-03	Chiapas	50	Female		GK	AY.113
	hCoV-19/Mexico/CHP_IBT_IMSS_3829/2021	EPI_ISL_5936979		2021-10-05	Chiapas	65	Female		GK	AY.113
	hCoV-19/Mexico/CHP_IBT_IMSS_3830/2021	EPI_ISL_5936980		2021-10-06	Chiapas	47	Male		GK	AY.113
	hCoV-19/Mexico/CHP_IBT_IMSS_3831/2021	EPI_ISL_5936640		2021-10-05	Chiapas	28	Female		GK	AY.100
	hCoV-19/Mexico/CHP_IBT_IMSS_3832/2021	EPI_ISL_5936641		2021-10-05	Chiapas	59	Male		GK	AY.100
	hCoV-19/Mexico/CHP_IBT_IMSS_3847/2021	EPI_ISL_5936642		2021-10-06	Chiapas	64	Male		GK	AY.100
	hCoV-19/Mexico/CHP_IBT_IMSS_3869/2021	EPI_ISL_5936981		2021-10-06	Chiapas	86	Female		GK	AY.113
	hCoV-19/Mexico/CHP_IBT_IMSS_3870/2021	EPI_ISL_5936643		2021-10-05	Chiapas	59	Male		GK	AY.100
	hCoV-19/Mexico/CHP_IBT_IMSS_3905/2021	EPI_ISL_5936656		2021-10-09	Chiapas	75	Male		GK	B.1.617.2
	hCoV-19/Mexico/CHP_IBT_IMSS_3906/2021	EPI_ISL_5936982		2021-10-09	Chiapas	74	Male		GK	AY.113
	hCoV-19/Mexico/CHP_IBT_IMSS_4348/2021	EPI_ISL_6863560		2021-11-04	Chiapas	49	Male		GK	AY.100
	hCoV-19/Mexico/CHP_IBT_IMSS_4445/2021	EPI_ISL_6863662		2021-11-08	Chiapas	76	Male		GK	AY.100
	hCoV-19/Mexico/CHP_IBT_IMSS_4466/2021	EPI_ISL_6863683		2021-11-09	Chiapas	76	Female		GK	AY.25
	hCoV-19/Mexico/CHP_INER_IMSS_1694/2021	EPI_ISL_3556965		2021-07-22	Chiapas	24	Male		GK	AY.26
	hCoV-19/Mexico/CHP_INER_IMSS_1760/2021	EPI_ISL_3557031		2021-07-27	Chiapas	35	Male		GK	AY.113
	hCoV-19/Mexico/CHP_INER_IMSS_1761/2021	EPI_ISL_3557032		2021-07-26	Chiapas	20	Male		GK	AY.113
	hCoV-19/Mexico/CHP_INER_IMSS_1871/2021	EPI_ISL_3557142		2021-07-26	Chiapas	40	Female		GK	AY.26
	hCoV-19/Mexico/CHP_INER_IMSS_1872/2021	EPI_ISL_3557143		2021-07-26	Chiapas	26	Male		GK	B.1.617.2
	hCoV-19/Mexico/CHP_INER_IMSS_1873/2021	EPI_ISL_3557144		2021-07-26	Chiapas	28	Male		GK	B.1.617.2
	hCoV-19/Mexico/CHP_INER_IMSS_1874/2021	EPI_ISL_3557145		2021-07-26	Chiapas	26	Female		GK	B.1.617.2
	hCoV-19/Mexico/CHP_INER_IMSS_1875/2021	EPI_ISL_3557146		2021-07-26	Chiapas	37	Male		GK	AY.26
	hCoV-19/Mexico/CHP_INER_IMSS_1876/2021	EPI_ISL_3557147		2021-07-26	Chiapas	35	Male		GK	B.1.617.2
	hCoV-19/Mexico/CHP_INER_IMSS_1877/2021	EPI_ISL_3557148		2021-07-26	Chiapas	21	Male		GK	AY.20
	hCoV-19/Mexico/CHP_INER_IMSS_1878/2021	EPI_ISL_3557149		2021-07-26	Chiapas	51	Female		GK	AY.20
	hCoV-19/Mexico/CHP_INER_IMSS_1879/2021	EPI_ISL_3557150		2021-07-26	Chiapas	55	Female		GK	B.1.617.2
	hCoV-19/Mexico/CHP_INER_IMSS_1880/2021	EPI_ISL_3557151		2021-07-27	Chiapas	24	Male		GK	AY.26
	hCoV-19/Mexico/CHP_INER_IMSS_1881/2021	EPI_ISL_3557152		2021-07-27	Chiapas	39	Female		GK	B.1.617.2
	hCoV-19/Mexico/CHP_INER_IMSS_1882/2021	EPI_ISL_3557153		2021-07-29	Chiapas	61	Male		GK	AY.113
	hCoV-19/Mexico/CHP_INER_IMSS_1883/2021	EPI_ISL_3557154		2021-07-27	Chiapas	49	Female		GK	B.1.617.2
	hCoV-19/Mexico/CHP_INER_IMSS_1885/2021	EPI_ISL_3557156		2021-07-27	Chiapas	19	Female		GK	B.1.617.2
	hCoV-19/Mexico/CHP_INER_IMSS_1886/2021	EPI_ISL_3557157		2021-07-26	Chiapas	34	Male		GK	AY.122
	hCoV-19/Mexico/CHP_INER_IMSS_2029/2021	EPI_ISL_4299452		2021-08-18	Chiapas	29	Female		GK	AY.113
	hCoV-19/Mexico/CHP_INER_IMSS_2030/2021	EPI_ISL_4299453		2021-08-18	Chiapas	27	Male		GK	AY.20
	hCoV-19/Mexico/CHP_INER_IMSS_2032/2021	EPI_ISL_4299455		2021-08-18	Chiapas	35	Female		GK	AY.26
	hCoV-19/Mexico/CHP_INER_IMSS_2033/2021	EPI_ISL_4299456		2021-08-18	Chiapas	21	Female		GK	AY.113
	hCoV-19/Mexico/CHP_INER_IMSS_2172/2021	EPI_ISL_4299595		2021-08-21	Chiapas	24	Female		GK	AY.20
	hCoV-19/Mexico/CHP_INER_IMSS_2173/2021	EPI_ISL_4299596		2021-08-21	Chiapas	48	Male		GK	AY.20
	hCoV-19/Mexico/CHP_INER_IMSS_2174/2021	EPI_ISL_4299597		2021-08-20	Chiapas	47	Female		GK	AY.20
	hCoV-19/Mexico/CHP_INER_IMSS_2175/2021	EPI_ISL_4299598		2021-08-20	Chiapas	33	Male		GK	B.1.617.2
	hCoV-19/Mexico/CHP_INER_IMSS_2176/2021	EPI_ISL_4299599		2021-08-21	Chiapas	32	Male		GK	AY.20
	hCoV-19/Mexico/CHP_INER_IMSS_2179/2021	EPI_ISL_4299602		2021-08-22	Chiapas	40	Male		GK	AY.113
	hCoV-19/Mexico/CHP_INER_IMSS_2180/2021	EPI_ISL_4299603		2021-08-22	Chiapas	27	Male		GK	AY.113
	hCoV-19/Mexico/CHP_INER_IMSS_2181/2021	EPI_ISL_4299604		2021-08-22	Chiapas	67	Male		GK	AY.113
	hCoV-19/Mexico/CHP_INER_IMSS_2183/2021	EPI_ISL_4299606		2021-08-22	Chiapas	26	Male		GK	AY.20
	hCoV-19/Mexico/CHP_INER_IMSS_2184/2021	EPI_ISL_4299607		2021-08-22	Chiapas	52	Male		GK	AY.113
	hCoV-19/Mexico/CHP_INER_IMSS_2185/2021	EPI_ISL_4299608		2021-08-22	Chiapas	23	Male		GK	AY.113
	hCoV-19/Mexico/CHP_INER_IMSS_2186/2021	EPI_ISL_4299609		2021-08-22	Chiapas	33	Female		GK	AY.20
	hCoV-19/Mexico/CHP_INER_IMSS_2493/2021	EPI_ISL_5194258		2021-09-18	Chiapas	66	Female		GK	AY.113
	hCoV-19/Mexico/CHP_INER_IMSS_2494/2021	EPI_ISL_5194259		2021-09-18	Chiapas	61	Female		GK	AY.113
	hCoV-19/Mexico/CHP_INER_IMSS_2495/2021	EPI_ISL_5194260		2021-09-19	Chiapas	77	Male		GK	AY.113
	hCoV-19/Mexico/CHP_INER_IMSS_2496/2021	EPI_ISL_5193916		2021-09-19	Chiapas	74	Female		GK	B.1.617.2
	hCoV-19/Mexico/CHP_INER_IMSS_2549/2021	EPI_ISL_5193909		2021-09-20	Chiapas	40	Female		G	AY.26
	hCoV-19/Mexico/CHP_INER_IMSS_2550/2021	EPI_ISL_5194261		2021-09-20	Chiapas	65	Female		GK	AY.113
	hCoV-19/Mexico/CHP_INER_IMSS_2580/2021	EPI_ISL_5194262		2021-09-20	Chiapas	78	Female		GK	AY.113
	hCoV-19/Mexico/CHP_INER_IMSS_2855/2021	EPI_ISL_6227283		2021-10-15	Chiapas	46	Male		GK	AY.113
	hCoV-19/Mexico/CHP_INER_IMSS_2856/2021	EPI_ISL_6227284		2021-10-15	Chiapas	40	Male		GK	AY.113
	hCoV-19/Mexico/CHP_INER_IMSS_2857/2021	EPI_ISL_6227556		2021-10-15	Chiapas	26	Male		GK	AY.113
	hCoV-19/Mexico/CHP_INER_IMSS_2858/2021	EPI_ISL_6227285		2021-10-14	Chiapas	65	Male		GK	AY.113
	hCoV-19/Mexico/CHP_INER_IMSS_2914/2021	EPI_ISL_6227338		2021-10-20	Chiapas	64	Female		GK	AY.113
	hCoV-19/Mexico/CHP_INER_IMSS_2915/2021	EPI_ISL_6227339		2021-10-17	Chiapas	23	Female		GK	AY.113
	hCoV-19/Mexico/CHP_LANGEBIO_IMSS_2055/2021	EPI_ISL_3805567		2021-08-03	Chiapas	43	Male		GK	AY.20
	hCoV-19/Mexico/CHP_LANGEBIO_IMSS_2056/2021	EPI_ISL_3805624		2021-08-03	Chiapas	7	Male		GK	AY.113
	hCoV-19/Mexico/CHP_LANGEBIO_IMSS_2057/2021	EPI_ISL_3805511		2021-08-03	Chiapas	26	Female		GK	AY.113
	hCoV-19/Mexico/CHP_LANGEBIO_IMSS_2058/2021	EPI_ISL_3805538		2021-08-03	Chiapas	33	Male		GK	AY.113
	hCoV-19/Mexico/CHP_LANGEBIO_IMSS_2061/2021	EPI_ISL_3805606		2021-08-02	Chiapas	61	Female		GK	AY.113
	hCoV-19/Mexico/CHP_LANGEBIO_IMSS_2063/2021	EPI_ISL_3805593		2021-08-03	Chiapas	56	Female		GK	AY.20
	hCoV-19/Mexico/CHP_LANGEBIO_IMSS_2064/2021	EPI_ISL_3805752		2021-08-04	Chiapas	46	Male		GK	AY.113
	hCoV-19/Mexico/CHP_LANGEBIO_IMSS_2065/2021	EPI_ISL_3805642		2021-08-03	Chiapas	89	Male		GK	AY.113
	hCoV-19/Mexico/CHP_LANGEBIO_IMSS_2110/2021	EPI_ISL_3805754		2021-08-03	Chiapas	78	Male		GK	AY.113
	hCoV-19/Mexico/CHP_LANGEBIO_IMSS_2111/2021	EPI_ISL_3805492		2021-08-03	Chiapas	20	Male		GK	AY.26
	hCoV-19/Mexico/CHP_LANGEBIO_IMSS_2113/2021	EPI_ISL_3805512		2021-08-04	Chiapas	26	Male		GK	AY.20
	hCoV-19/Mexico/CHP_LANGEBIO_IMSS_2114/2021	EPI_ISL_3805572		2021-08-04	Chiapas	45	Female		GK	AY.20
	hCoV-19/Mexico/CHP_LANGEBIO_IMSS_2115/2021	EPI_ISL_3805573		2021-08-04	Chiapas	45	Female		GK	AY.113
	hCoV-19/Mexico/CHP_LANGEBIO_IMSS_2116/2021	EPI_ISL_3805509		2021-08-04	Chiapas	25	Male		GK	AY.113
	hCoV-19/Mexico/CHP_LANGEBIO_IMSS_2117/2021	EPI_ISL_3805539		2021-08-04	Chiapas	33	Female		GK	AY.113
	hCoV-19/Mexico/CHP_LANGEBIO_IMSS_2118/2021	EPI_ISL_3805756		2021-08-04	Chiapas	31	Male		GK	AY.78
	hCoV-19/Mexico/CHP_LANGEBIO_IMSS_2352/2021	EPI_ISL_4549875		2021-08-29	Chiapas	79	Female		GK	AY.26
	hCoV-19/Mexico/CHP_LANGEBIO_IMSS_2353/2021	EPI_ISL_4549876		2021-08-27	Chiapas	82	Male		GK	AY.113
	hCoV-19/Mexico/CHP_LANGEBIO_IMSS_2354/2021	EPI_ISL_4549877		2021-08-27	Chiapas	12	Male		GK	AY.113
	hCoV-19/Mexico/CHP_LANGEBIO_IMSS_2355/2021	EPI_ISL_4549878		2021-08-28	Chiapas	23	Female		GK	AY.20
	hCoV-19/Mexico/CHP_LANGEBIO_IMSS_2356/2021	EPI_ISL_4549879		2021-08-29	Chiapas	16	Male		GK	AY.113
	hCoV-19/Mexico/CHP_LANGEBIO_IMSS_2371/2021	EPI_ISL_4549880		2021-08-31	Chiapas	49	Female		GK	AY.26
	hCoV-19/Mexico/CHP_LANGEBIO_IMSS_2372/2021	EPI_ISL_4549881		2021-08-30	Chiapas	53	Female		GK	AY.20
	hCoV-19/Mexico/CHP_LANGEBIO_IMSS_2373/2021	EPI_ISL_4549882		2021-08-28	Chiapas	47	Female		GK	AY.100
	hCoV-19/Mexico/CHP_LANGEBIO_IMSS_2374/2021	EPI_ISL_4549883		2021-08-29	Chiapas	24	Female		GK	AY.100
	hCoV-19/Mexico/CHP_LANGEBIO_IMSS_2449/2021	EPI_ISL_4549884		2021-09-01	Chiapas	51	Male		GK	AY.113
	hCoV-19/Mexico/CHP_LANGEBIO_IMSS_2450/2021	EPI_ISL_4549885		2021-09-03	Chiapas	84	Male		GK	AY.122
	hCoV-19/Mexico/CHP_LANGEBIO_IMSS_2451/2021	EPI_ISL_4549886		2021-09-02	Chiapas	72	Male		GK	AY.26
	hCoV-19/Mexico/CHP_LANGEBIO_IMSS_2452/2021	EPI_ISL_4549887		2021-09-03	Chiapas	43	Male		GK	AY.100
	hCoV-19/Mexico/CHP_LANGEBIO_IMSS_2453/2021	EPI_ISL_4549888		2021-09-02	Chiapas	60	Male		GK	AY.100
	hCoV-19/Mexico/CHP_LANGEBIO_IMSS_2454/2021	EPI_ISL_4549889		2021-09-02	Chiapas	66	Female		GK	AY.100
	hCoV-19/Mexico/CHP_LANGEBIO_IMSS_2455/2021	EPI_ISL_4549890		2021-09-02	Chiapas	56	Female		GK	AY.100
	hCoV-19/Mexico/CHP_LANGEBIO_IMSS_2456/2021	EPI_ISL_4549891		2021-09-02	Chiapas	21	Female		GK	AY.100
	hCoV-19/Mexico/CHP_LANGEBIO_IMSS_2457/2021	EPI_ISL_4549892		2021-09-02	Chiapas	67	Male		GK	AY.100
	hCoV-19/Mexico/CHP_LANGEBIO_IMSS_2818/2021	EPI_ISL_5850838		2021-09-24	Chiapas	32	Female		GK	AY.26
	hCoV-19/Mexico/CHP_LANGEBIO_IMSS_2819/2021	EPI_ISL_5850839		2021-09-25	Chiapas	78	Male		GK	AY.113
	hCoV-19/Mexico/CHP_LANGEBIO_IMSS_2820/2021	EPI_ISL_5850840		2021-09-25	Chiapas	62	Male		GK	AY.100
	hCoV-19/Mexico/CHP_LANGEBIO_IMSS_2821/2021	EPI_ISL_5850841		2021-09-25	Chiapas	57	Male		GK	AY.100
	hCoV-19/Mexico/CHP_LANGEBIO_IMSS_2822/2021	EPI_ISL_5850842		2021-09-24	Chiapas	84	Male		GK	AY.100
	hCoV-19/Mexico/CHP_LANGEBIO_IMSS_2842/2021	EPI_ISL_5850866		2021-09-26	Chiapas	61	Female		GK	AY.20
	hCoV-19/Mexico/CHP_LANGEBIO_IMSS_2899/2021	EPI_ISL_5850923		2021-09-28	Chiapas	25	Male		GK	AY.100
	hCoV-19/Mexico/CHP_LANGEBIO_IMSS_2929/2021	EPI_ISL_5850953		2021-09-28	Chiapas	81	Male		GK	AY.101
	hCoV-19/Mexico/CHP_LANGEBIO_IMSS_2930/2021	EPI_ISL_5850954		2021-09-28	Chiapas	76	Female		GK	AY.113
	hCoV-19/Mexico/CHP_LANGEBIO_IMSS_2931/2021	EPI_ISL_5850955		2021-09-28	Chiapas	75	Female		GK	AY.113
	hCoV-19/Mexico/CHP_LANGEBIO_IMSS_2937/2021	EPI_ISL_5850965		2021-09-29	Chiapas	79	Male		GK	AY.113
	hCoV-19/Mexico/CHP_LANGEBIO_IMSS_2938/2021	EPI_ISL_5850966		2021-09-29	Chiapas	28	Female		GK	AY.20
	hCoV-19/Mexico/CHP_LANGEBIO_IMSS_2939/2021	EPI_ISL_5850967		2021-09-29	Chiapas	62	Male		GK	AY.100
	hCoV-19/Mexico/CHP_LANGEBIO_IMSS_3254/2021	EPI_ISL_6775748		2021-10-22	Chiapas	64	Male		GK	AY.26
	hCoV-19/Mexico/CHP_LANGEBIO_IMSS_3255/2021	EPI_ISL_6775749		2021-10-23	Chiapas	70	Female		GK	AY.20
	hCoV-19/Mexico/CHP_LANGEBIO_IMSS_3318/2021	EPI_ISL_6775750		2021-10-25	Chiapas	82	Male		GK	AY.113
	hCoV-19/Mexico/CHP_LANGEBIO_IMSS_3319/2021	EPI_ISL_6775751		2021-10-28	Chiapas	75	Male		GK	AY.100
	hCoV-19/Mexico/CHP_LANGEBIO_IMSS_70804_NC/2021	EPI_ISL_4549893		2021-08-30	Chiapas	69	Male		GK	AY.100
	hCoV-19/Mexico/CHP-INER_IMSS_1623/2021	EPI_ISL_3155633		2021-07-09	Chiapas	32	Female		GK	B.1.617.2
	hCoV-19/Mexico/CHP-LANGEBIO_IMSS_1861/2021	EPI_ISL_2942925		2021-06-30	Chiapas	28	Female		G	AY.26
	hCoV-19/Mexico/CHP-LANGEBIO_IMSS_1863/2021	EPI_ISL_2942927		2021-06-30	Chiapas	29	Female		G	AY.100
	hCoV-19/Mexico/CHP-LANGEBIO_IMSS_1864/2021	EPI_ISL_2942928		2021-06-30	Chiapas	32	Male		G	AY.100
	hCoV-19/Mexico/CHP-LANGEBIO_IMSS_1866/2021	EPI_ISL_2942929		2021-07-01	Chiapas	48	Male		G	AY.100
	hCoV-19/Mexico/COA_IBT_IMSS_01112337/NC/2021	EPI_ISL_5936565		2021-10-12	Coahuila	39	Female		GK	AY.20
	hCoV-19/Mexico/COA_IBT_IMSS_01112339/NC/2021	EPI_ISL_5936562		2021-10-12	Coahuila	0	Male		GK	AY.20
	hCoV-19/Mexico/COA_IBT_IMSS_202101100923/NC/2021	EPI_ISL_4879066		2021-09-14	Coahuila	78	Female		GK	AY.44
	hCoV-19/Mexico/COA_IBT_IMSS_2295/2021	EPI_ISL_3347614		2021-07-09	Coahuila	44	Male		GK	AY.20
	hCoV-19/Mexico/COA_IBT_IMSS_2317/2021	EPI_ISL_3347631		2021-07-13	Coahuila	39	Male		GK	AY.26
	hCoV-19/Mexico/COA_IBT_IMSS_2327/2021	EPI_ISL_3347639		2021-07-14	Coahuila	36	Male		GK	AY.20
	hCoV-19/Mexico/COA_IBT_IMSS_2335/2021	EPI_ISL_3347646		2021-07-15	Coahuila	61	Male		GK	AY.26
	hCoV-19/Mexico/COA_IBT_IMSS_2337/2021	EPI_ISL_3347648		2021-07-15	Coahuila	38	Male		GK	AY.100
	hCoV-19/Mexico/COA_IBT_IMSS_2340/2021	EPI_ISL_3347650		2021-07-14	Coahuila	42	Female		GK	AY.26
	hCoV-19/Mexico/COA_IBT_IMSS_2369/2021	EPI_ISL_3347667		2021-07-21	Coahuila	44	Female		GK	AY.26
	hCoV-19/Mexico/COA_IBT_IMSS_2370/2021	EPI_ISL_3347668		2021-07-21	Coahuila	25	Female		GK	AY.26
	hCoV-19/Mexico/COA_IBT_IMSS_2798/2021	EPI_ISL_4006248		2021-08-09	Coahuila	39	Male		GK	AY.26
	hCoV-19/Mexico/COA_IBT_IMSS_2799/2021	EPI_ISL_4006249		2021-08-06	Coahuila	56	Male		GK	AY.26
	hCoV-19/Mexico/COA_IBT_IMSS_2800/2021	EPI_ISL_4006250		2021-08-06	Coahuila	43	Male		GK	AY.26
	hCoV-19/Mexico/COA_IBT_IMSS_2801/2021	EPI_ISL_4006251		2021-08-08	Coahuila	90	Male		GK	AY.26
	hCoV-19/Mexico/COA_IBT_IMSS_2813/2021	EPI_ISL_4006263		2021-08-08	Coahuila	46	Male		GK	AY.20
	hCoV-19/Mexico/COA_IBT_IMSS_2828/2021	EPI_ISL_4006278		2021-08-13	Coahuila	41	Female		GK	AY.20
	hCoV-19/Mexico/COA_IBT_IMSS_2829/2021	EPI_ISL_4006279		2021-08-11	Coahuila	67	Female		GK	AY.26
	hCoV-19/Mexico/COA_IBT_IMSS_2830/2021	EPI_ISL_4006280		2021-08-12	Coahuila	48	Female		GK	AY.98.1
	hCoV-19/Mexico/COA_IBT_IMSS_2833/2021	EPI_ISL_4006283		2021-08-12	Coahuila	28	Female		GK	AY.113
	hCoV-19/Mexico/COA_IBT_IMSS_2834/2021	EPI_ISL_4006284		2021-08-13	Coahuila	67	Male		GK	AY.26
	hCoV-19/Mexico/COA_IBT_IMSS_2843/2021	EPI_ISL_4006294		2021-08-11	Coahuila	33	Male		GK	AY.113
	hCoV-19/Mexico/COA_IBT_IMSS_2851/2021	EPI_ISL_4006302		2021-08-17	Coahuila	68	Female		GK	AY.100
	hCoV-19/Mexico/COA_IBT_IMSS_3297/2021	EPI_ISL_4878572		2021-09-06	Coahuila	58	Male		GK	AY.20
	hCoV-19/Mexico/COA_IBT_IMSS_3298/2021	EPI_ISL_4878573		2021-09-06	Coahuila	67	Female		GK	AY.20
	hCoV-19/Mexico/COA_IBT_IMSS_3299/2021	EPI_ISL_4878574		2021-09-07	Coahuila	53	Male		GK	AY.20
	hCoV-19/Mexico/COA_IBT_IMSS_3302/2021	EPI_ISL_4878577		2021-09-05	Coahuila	68	Male		GK	AY.26
	hCoV-19/Mexico/COA_IBT_IMSS_3303/2021	EPI_ISL_4878578		2021-09-07	Coahuila	10	Female		GK	AY.26
	hCoV-19/Mexico/COA_IBT_IMSS_3304/2021	EPI_ISL_4878999		2021-09-07	Coahuila	22	Female		GK	B.1.617.2
	hCoV-19/Mexico/COA_IBT_IMSS_3305/2021	EPI_ISL_4879037		2021-09-07	Coahuila	94	Male		GK	AY.100
	hCoV-19/Mexico/COA_IBT_IMSS_3334/2021	EPI_ISL_4878608		2021-09-10	Coahuila	28	Female		GK	AY.26
	hCoV-19/Mexico/COA_IBT_IMSS_3335/2021	EPI_ISL_4878609		2021-09-10	Coahuila	31	Female		GK	AY.3
	hCoV-19/Mexico/COA_IBT_IMSS_3336/2021	EPI_ISL_4878610		2021-09-10	Coahuila	21	Male		GK	AY.20
	hCoV-19/Mexico/COA_IBT_IMSS_3338/2021	EPI_ISL_4878612		2021-09-12	Coahuila	3	Male		GK	AY.20
	hCoV-19/Mexico/COA_IBT_IMSS_3339/2021	EPI_ISL_4878613		2021-09-12	Coahuila	81	Male		GK	AY.20
	hCoV-19/Mexico/COA_IBT_IMSS_3349/2021	EPI_ISL_4878624		2021-09-11	Coahuila	54	Female		GK	AY.20
	hCoV-19/Mexico/COA_IBT_IMSS_3350/2021	EPI_ISL_4878625		2021-09-13	Coahuila	71	Female		GK	AY.3
	hCoV-19/Mexico/COA_IBT_IMSS_3367/2021	EPI_ISL_4878642		2021-09-15	Coahuila	75	Male		GK	AY.113
	hCoV-19/Mexico/COA_IBT_IMSS_3368/2021	EPI_ISL_4878643		2021-09-14	Coahuila	90	Female		GK	AY.113
	hCoV-19/Mexico/COA_IBT_IMSS_3369/2021	EPI_ISL_4879060		2021-09-14	Coahuila	77	Male		GK	AY.44
	hCoV-19/Mexico/COA_IBT_IMSS_3786/2021	EPI_ISL_5936958		2021-10-10	Coahuila	62	Female		GK	AY.20
	hCoV-19/Mexico/COA_IBT_IMSS_3787/2021	EPI_ISL_5936959		2021-10-10	Coahuila	61	Female		GK	AY.20
	hCoV-19/Mexico/COA_IBT_IMSS_3788/2021	EPI_ISL_5936960		2021-10-10	Coahuila	51	Female		GK	AY.20
	hCoV-19/Mexico/COA_IBT_IMSS_3789/2021	EPI_ISL_5936961		2021-10-11	Coahuila	32	Female		GK	AY.20
	hCoV-19/Mexico/COA_IBT_IMSS_3791/2021	EPI_ISL_5936962		2021-10-11	Coahuila	53	Female		GK	AY.26
	hCoV-19/Mexico/COA_IBT_IMSS_3792/2021	EPI_ISL_5936963		2021-10-11	Coahuila	42	Female		GK	AY.25
	hCoV-19/Mexico/COA_IBT_IMSS_3794/2021	EPI_ISL_5936964		2021-10-11	Coahuila	72	Female		GK	AY.26
	hCoV-19/Mexico/COA_IBT_IMSS_3795/2021	EPI_ISL_5936965		2021-10-09	Coahuila	70	Female		GK	AY.20
	hCoV-19/Mexico/COA_IBT_IMSS_3796/2021	EPI_ISL_5936966		2021-10-10	Coahuila	64	Male		GK	AY.103
	hCoV-19/Mexico/COA_IBT_IMSS_3800/2021	EPI_ISL_5937101		2021-10-11	Coahuila	31	Female		GK	AY.103
	hCoV-19/Mexico/COA_IBT_IMSS_3804/2021	EPI_ISL_5936967		2021-10-12	Coahuila	9	Female		GK	AY.20
	hCoV-19/Mexico/COA_IBT_IMSS_3805/2021	EPI_ISL_5936968		2021-10-12	Coahuila	2	Male		GK	AY.20
	hCoV-19/Mexico/COA_IBT_IMSS_3806/2021	EPI_ISL_5936969		2021-10-12	Coahuila	9	Male		GK	AY.20
	hCoV-19/Mexico/COA_IBT_IMSS_3807/2021	EPI_ISL_5936567		2021-10-12	Coahuila	6	Male		GK	AY.20
	hCoV-19/Mexico/COA_IBT_IMSS_3811/2021	EPI_ISL_5936571		2021-10-14	Coahuila	60	Male		GK	AY.20
	hCoV-19/Mexico/COA_IBT_IMSS_3812/2021	EPI_ISL_5936970		2021-10-14	Coahuila	5	Male		GK	AY.3
	hCoV-19/Mexico/COA_IBT_IMSS_3813/2021	EPI_ISL_5936971		2021-10-14	Coahuila	31	Female		GK	AY.3
	hCoV-19/Mexico/COA_IBT_IMSS_3814/2021	EPI_ISL_5936972		2021-10-14	Coahuila	88	Female		GK	AY.20
	hCoV-19/Mexico/COA_IBT_IMSS_4150/2021	EPI_ISL_6863311		2021-10-30	Coahuila	23	Male		GK	AY.20
	hCoV-19/Mexico/COA_IBT_IMSS_4157/2021	EPI_ISL_6863318		2021-10-31	Coahuila	85	Male		GK	AY.26
	hCoV-19/Mexico/COA_IBT_IMSS_4160/2021	EPI_ISL_6863321		2021-10-26	Coahuila	67	Female		GK	AY.20
	hCoV-19/Mexico/COA_IBT_IMSS_4161/2021	EPI_ISL_6863322		2021-10-26	Coahuila	1	Male		GK	AY.26
	hCoV-19/Mexico/COA_IBT_IMSS_4162/2021	EPI_ISL_6863323		2021-10-30	Coahuila	60	Female		GK	AY.3
	hCoV-19/Mexico/COA_IBT_IMSS_4163/2021	EPI_ISL_6863324		2021-10-29	Coahuila	69	Female		GK	AY.20
	hCoV-19/Mexico/COA_IBT_IMSS_4164/2021	EPI_ISL_6863325		2021-10-29	Coahuila	83	Male		GK	AY.100
	hCoV-19/Mexico/COA_IBT_IMSS_4165/2021	EPI_ISL_6863326		2021-10-31	Coahuila	75	Male		GK	AY.20
	hCoV-19/Mexico/COA_IBT_IMSS_4166/2021	EPI_ISL_6863327		2021-10-28	Coahuila	34	Male		GK	AY.100
	hCoV-19/Mexico/COA_IBT_IMSS_4167/2021	EPI_ISL_6863328		2021-10-27	Coahuila	60	Female		GK	AY.100
	hCoV-19/Mexico/COA_IBT_IMSS_4168/2021	EPI_ISL_6863329		2021-10-29	Coahuila	54	Male		GK	AY.3
	hCoV-19/Mexico/COA_IBT_IMSS_4169/2021	EPI_ISL_6863330		2021-10-31	Coahuila	74	Female		GK	AY.20
	hCoV-19/Mexico/COA_IBT_IMSS_4170/2021	EPI_ISL_6863331		2021-10-28	Coahuila	45	Male		GK	AY.20
	hCoV-19/Mexico/COA_IBT_IMSS_4171/2021	EPI_ISL_6863332		2021-10-29	Coahuila	62	Male		GK	AY.20
	hCoV-19/Mexico/COA_IBT_IMSS_4172/2021	EPI_ISL_6863333		2021-11-01	Coahuila	70	Male		GK	AY.26
	hCoV-19/Mexico/COA_IBT_IMSS_4173/2021	EPI_ISL_6863334		2021-10-28	Coahuila	47	Female		GK	AY.20
	hCoV-19/Mexico/COA_IBT_IMSS_4174/2021	EPI_ISL_6863335		2021-10-28	Coahuila	50	Female		GK	AY.100
	hCoV-19/Mexico/COA_IBT_IMSS_4178/2021	EPI_ISL_6863339		2021-11-01	Coahuila	37	Male		GK	AY.43
	hCoV-19/Mexico/COA_IBT_IMSS_4179/2021	EPI_ISL_6863340		2021-11-02	Coahuila	64	Male		GK	AY.20
	hCoV-19/Mexico/COA_IBT_IMSS_4180/2021	EPI_ISL_6863341		2021-11-01	Coahuila	69	Male		GK	AY.113
	hCoV-19/Mexico/COA_IBT_IMSS_4194/2021	EPI_ISL_6863356		2021-10-31	Coahuila	23	Female		GK	AY.103
	hCoV-19/Mexico/COA_IBT_IMSS_4204/2021	EPI_ISL_6863366		2021-11-01	Coahuila	40	Female		GK	AY.26
	hCoV-19/Mexico/COA_IBT_IMSS_4205/2021	EPI_ISL_6863367		2021-11-01	Coahuila	72	Male		GK	AY.20
	hCoV-19/Mexico/COA_IBT_IMSS_4206/2021	EPI_ISL_6863368		2021-11-01	Coahuila	27	Female		GK	AY.20
	hCoV-19/Mexico/COA_IBT_IMSS_86314/NC/2021	EPI_ISL_4006293		2021-08-16	Coahuila	41	Female		G	AY.20
	hCoV-19/Mexico/COA_INER_IMSS_1649/2021	EPI_ISL_3556920		2021-07-25	Coahuila	28	Female		GK	B.1.617.2
	hCoV-19/Mexico/COA_INER_IMSS_1663/2021	EPI_ISL_3556934		2021-07-27	Coahuila	39	Male		GK	AY.20
	hCoV-19/Mexico/COA_INER_IMSS_1664/2021	EPI_ISL_3556935		2021-07-27	Coahuila	25	Male		GK	AY.26
	hCoV-19/Mexico/COA_INER_IMSS_1665/2021	EPI_ISL_3556936		2021-07-27	Coahuila	43	Female		GK	AY.20
	hCoV-19/Mexico/COA_INER_IMSS_1666/2021	EPI_ISL_3556937		2021-07-27	Coahuila	48	Male		GK	AY.3
	hCoV-19/Mexico/COA_INER_IMSS_1679/2021	EPI_ISL_3556950		2021-07-28	Coahuila	47	Female		GK	B.1.617.2
	hCoV-19/Mexico/COA_INER_IMSS_2034/2021	EPI_ISL_4299457		2021-08-20	Coahuila	31	Female		GK	AY.113
	hCoV-19/Mexico/COA_INER_IMSS_2035/2021	EPI_ISL_4299458		2021-08-20	Coahuila	33	Female		GK	AY.20
	hCoV-19/Mexico/COA_INER_IMSS_2050/2021	EPI_ISL_4299473		2021-08-20	Coahuila	60	Female		GK	B.1.617.2
	hCoV-19/Mexico/COA_INER_IMSS_2051/2021	EPI_ISL_4299474		2021-08-20	Coahuila	32	Male		GK	AY.3
	hCoV-19/Mexico/COA_INER_IMSS_2052/2021	EPI_ISL_4299475		2021-08-21	Coahuila	38	Female		GK	AY.20
	hCoV-19/Mexico/COA_INER_IMSS_2053/2021	EPI_ISL_4299476		2021-08-22	Coahuila	32	Male		GK	B.1.617.2
	hCoV-19/Mexico/COA_INER_IMSS_2054/2021	EPI_ISL_4299477		2021-08-21	Coahuila	69	Female		GK	AY.25
	hCoV-19/Mexico/COA_INER_IMSS_2055/2021	EPI_ISL_4299478		2021-08-19	Coahuila	27	Male		GK	B.1.617.2
	hCoV-19/Mexico/COA_INER_IMSS_2056/2021	EPI_ISL_4299479		2021-08-19	Coahuila	62	Male		GK	AY.20
	hCoV-19/Mexico/COA_INER_IMSS_2057/2021	EPI_ISL_4299480		2021-08-19	Coahuila	32	Male		GK	AY.20
	hCoV-19/Mexico/COA_INER_IMSS_2058/2021	EPI_ISL_4299481		2021-08-19	Coahuila	35	Female		GK	AY.26
	hCoV-19/Mexico/COA_INER_IMSS_2059/2021	EPI_ISL_4299482		2021-08-19	Coahuila	80	Female		GK	AY.20
	hCoV-19/Mexico/COA_INER_IMSS_2060/2021	EPI_ISL_4299483		2021-08-19	Coahuila	83	Female		GK	AY.20
	hCoV-19/Mexico/COA_INER_IMSS_2061/2021	EPI_ISL_4299484		2021-08-19	Coahuila	80	Female		GK	B.1.617.2
	hCoV-19/Mexico/COA_INER_IMSS_2062/2021	EPI_ISL_4299485		2021-08-20	Coahuila	56	Male		GK	AY.103
	hCoV-19/Mexico/COA_INER_IMSS_2063/2021	EPI_ISL_4299486		2021-08-19	Coahuila	21	Female		GK	AY.25
	hCoV-19/Mexico/COA_INER_IMSS_2089/2021	EPI_ISL_4299512		2021-08-23	Coahuila	33	Female		GK	AY.26
	hCoV-19/Mexico/COA_INER_IMSS_2091/2021	EPI_ISL_4299514		2021-08-20	Coahuila	15	Male		GK	AY.26
	hCoV-19/Mexico/COA_INER_IMSS_2094/2021	EPI_ISL_4299517		2021-08-24	Coahuila	29	Female		GK	AY.26
	hCoV-19/Mexico/COA_INER_IMSS_2095/2021	EPI_ISL_4299518		2021-08-24	Coahuila	68	Female		GK	B.1.617.2
	hCoV-19/Mexico/COA_INER_IMSS_2096/2021	EPI_ISL_4299519		2021-08-24	Coahuila	65	Female		GK	AY.20
	hCoV-19/Mexico/COA_INER_IMSS_2102/2021	EPI_ISL_4299525		2021-08-25	Coahuila	25	Female		GK	AY.20
	hCoV-19/Mexico/COA_INER_IMSS_2103/2021	EPI_ISL_4299526		2021-08-25	Coahuila	32	Female		GK	AY.20
	hCoV-19/Mexico/COA_INER_IMSS_2104/2021	EPI_ISL_4299527		2021-08-25	Coahuila	31	Male		GK	AY.25
	hCoV-19/Mexico/COA_INER_IMSS_2113/2021	EPI_ISL_4299536		2021-08-26	Coahuila	52	Male		GK	AY.20
	hCoV-19/Mexico/COA_INER_IMSS_2114/2021	EPI_ISL_4299537		2021-08-26	Coahuila	19	Male		GK	AY.26
	hCoV-19/Mexico/COA_INER_IMSS_2115/2021	EPI_ISL_4299538		2021-08-26	Coahuila	31	Female		GK	AY.26
	hCoV-19/Mexico/COA_INER_IMSS_2116/2021	EPI_ISL_4299539		2021-08-27	Coahuila	60	Female		GK	AY.20
	hCoV-19/Mexico/COA_INER_IMSS_2391/2021	EPI_ISL_5194226		2021-09-20	Coahuila	81	Male		GK	AY.20
	hCoV-19/Mexico/COA_INER_IMSS_2392/2021	EPI_ISL_5194227		2021-09-20	Coahuila	14	Female		GK	AY.20
	hCoV-19/Mexico/COA_INER_IMSS_2393/2021	EPI_ISL_5194228		2021-09-17	Coahuila	61	Female		GK	AY.113
	hCoV-19/Mexico/COA_INER_IMSS_2395/2021	EPI_ISL_5194229		2021-09-21	Coahuila	37	Male		GK	AY.103
	hCoV-19/Mexico/COA_INER_IMSS_2401/2021	EPI_ISL_5194230		2021-09-20	Coahuila	43	Female		GK	AY.103
	hCoV-19/Mexico/COA_INER_IMSS_2402/2021	EPI_ISL_5194231		2021-09-21	Coahuila	56	Female		GK	AY.103
	hCoV-19/Mexico/COA_INER_IMSS_2403/2021	EPI_ISL_5194232		2021-09-21	Coahuila	54	Male		GK	AY.25
	hCoV-19/Mexico/COA_INER_IMSS_2404/2021	EPI_ISL_5194233		2021-09-21	Coahuila	51	Female		GK	B.1.617.2
	hCoV-19/Mexico/COA_INER_IMSS_2405/2021	EPI_ISL_5194234		2021-09-21	Coahuila	18	Female		GK	AY.20
	hCoV-19/Mexico/COA_INER_IMSS_2406/2021	EPI_ISL_5194235		2021-09-21	Coahuila	39	Male		GK	AY.20
	hCoV-19/Mexico/COA_INER_IMSS_2407/2021	EPI_ISL_5194236		2021-09-20	Coahuila	49	Female		GV	AY.26
	hCoV-19/Mexico/COA_INER_IMSS_2408/2021	EPI_ISL_5194237		2021-09-20	Coahuila	32	Male		GK	AY.20
	hCoV-19/Mexico/COA_INER_IMSS_2409/2021	EPI_ISL_5194238		2021-09-20	Coahuila	42	Female		GK	AY.113
	hCoV-19/Mexico/COA_INER_IMSS_2419/2021	EPI_ISL_5194239		2021-09-22	Coahuila	78	Male		GK	AY.103
	hCoV-19/Mexico/COA_INER_IMSS_2420/2021	EPI_ISL_5194240		2021-09-15	Coahuila	50	Female		GK	AY.75
	hCoV-19/Mexico/COA_INER_IMSS_2444/2021	EPI_ISL_5194241		2021-09-22	Coahuila	30	Female		GK	AY.103
	hCoV-19/Mexico/COA_INER_IMSS_2445/2021	EPI_ISL_5194242		2021-09-22	Coahuila	61	Female		GK	AY.103
	hCoV-19/Mexico/COA_INER_IMSS_2752/2021	EPI_ISL_6227191		2021-10-15	Coahuila	74	Female		GK	B.1.617.2
	hCoV-19/Mexico/COA_INER_IMSS_2755/2021	EPI_ISL_6227194		2021-10-17	Coahuila	27	Female		GK	B.1.617.2
	hCoV-19/Mexico/COA_INER_IMSS_2756/2021	EPI_ISL_6227195		2021-10-15	Coahuila	79	Male		GK	AY.25
	hCoV-19/Mexico/COA_INER_IMSS_2757/2021	EPI_ISL_6227530		2021-10-16	Coahuila	78	Male		GK	B.1.617.2
	hCoV-19/Mexico/COA_INER_IMSS_2758/2021	EPI_ISL_6227531		2021-10-14	Coahuila	76	Female		GK	AY.77
	hCoV-19/Mexico/COA_INER_IMSS_2778/2021	EPI_ISL_6227212		2021-10-19	Coahuila	53	Female		GK	AY.25
	hCoV-19/Mexico/COA_INER_IMSS_2779/2021	EPI_ISL_6227213		2021-10-18	Coahuila	0	Female		GK	AY.3
	hCoV-19/Mexico/COA_INER_IMSS_2789/2021	EPI_ISL_6227221		2021-10-18	Coahuila	34	Male		GK	AY.20
	hCoV-19/Mexico/COA_INER_IMSS_2790/2021	EPI_ISL_6227562		2021-10-20	Coahuila	39	Female		GK	AY.20
	hCoV-19/Mexico/COA_INER_IMSS_2791/2021	EPI_ISL_6227222		2021-10-18	Coahuila	37	Female		GK	AY.20
	hCoV-19/Mexico/COA_INER_IMSS_2792/2021	EPI_ISL_6227223		2021-10-18	Coahuila	80	Female		GK	B.1.617.2
	hCoV-19/Mexico/COA_INER_IMSS_2793/2021	EPI_ISL_6227224		2021-10-20	Coahuila	21	Male		GK	AY.119
	hCoV-19/Mexico/COA_INER_IMSS_2794/2021	EPI_ISL_6227225		2021-10-18	Coahuila	68	Male		GK	B.1.617.2
	hCoV-19/Mexico/COA_INER_IMSS_2795/2021	EPI_ISL_6227226		2021-10-18	Coahuila	24	Female		GK	AY.26
	hCoV-19/Mexico/COA_INER_IMSS_3113/2021	EPI_ISL_6227503		2021-10-07	Coahuila	22	Male		GK	AY.20
	hCoV-19/Mexico/COA_INER_IMSS_3114/2021	EPI_ISL_6227504		2021-10-07	Coahuila	27	Female		GK	AY.103
	hCoV-19/Mexico/COA_INER_IMSS_3115/2021	EPI_ISL_6227505		2021-10-07	Coahuila	52	Female		GK	AY.103
	hCoV-19/Mexico/COA_INER_IMSS_3116/2021	EPI_ISL_6227506		2021-10-09	Coahuila	51	Female		GK	AY.26
	hCoV-19/Mexico/COA_INER_IMSS_3117/2021	EPI_ISL_6227507		2021-10-12	Coahuila	77	Male		GK	AY.26
	hCoV-19/Mexico/COA_LANGEBIO_IMSS_1897/2021	EPI_ISL_3805438		2021-07-31	Coahuila	30	Male		GK	AY.100
	hCoV-19/Mexico/COA_LANGEBIO_IMSS_1898/2021	EPI_ISL_3805459		2021-07-31	Coahuila	42	Female		GK	AY.100
	hCoV-19/Mexico/COA_LANGEBIO_IMSS_1900/2021	EPI_ISL_3805433		2021-07-29	Coahuila	26	Female		GK	AY.25
	hCoV-19/Mexico/COA_LANGEBIO_IMSS_1901/2021	EPI_ISL_3805445		2021-07-30	Coahuila	34	Male		GK	AY.20
	hCoV-19/Mexico/COA_LANGEBIO_IMSS_1902/2021	EPI_ISL_3805426		2021-07-29	Coahuila	21	Male		GK	AY.20
	hCoV-19/Mexico/COA_LANGEBIO_IMSS_1905/2021	EPI_ISL_3805462		2021-07-30	Coahuila	46	Female		GK	AY.3
	hCoV-19/Mexico/COA_LANGEBIO_IMSS_1906/2021	EPI_ISL_3805446		2021-07-31	Coahuila	34	Male		GK	AY.3
	hCoV-19/Mexico/COA_LANGEBIO_IMSS_1907/2021	EPI_ISL_3805453		2021-08-02	Coahuila	39	Female		GK	AY.26
	hCoV-19/Mexico/COA_LANGEBIO_IMSS_1908/2021	EPI_ISL_3805431		2021-08-01	Coahuila	24	Female		GK	AY.100
	hCoV-19/Mexico/COA_LANGEBIO_IMSS_1909/2021	EPI_ISL_3805480		2021-07-31	Coahuila	68	Male		GK	AY.26
	hCoV-19/Mexico/COA_LANGEBIO_IMSS_1910/2021	EPI_ISL_3805472		2021-07-31	Coahuila	51	Female		GK	AY.20
	hCoV-19/Mexico/COA_LANGEBIO_IMSS_1912/2021	EPI_ISL_3805469		2021-08-02	Coahuila	49	Male		GK	AY.100
	hCoV-19/Mexico/COA_LANGEBIO_IMSS_1915/2021	EPI_ISL_3805425		2021-08-02	Coahuila	20	Female		GK	AY.26
	hCoV-19/Mexico/COA_LANGEBIO_IMSS_1916/2021	EPI_ISL_3805439		2021-07-31	Coahuila	30	Female		GK	AY.20
	hCoV-19/Mexico/COA_LANGEBIO_IMSS_1917/2021	EPI_ISL_3805463		2021-07-30	Coahuila	46	Female		GK	AY.100
	hCoV-19/Mexico/COA_LANGEBIO_IMSS_1921/2021	EPI_ISL_3805452		2021-08-03	Coahuila	38	Female		GK	AY.26
	hCoV-19/Mexico/COA_LANGEBIO_IMSS_1922/2021	EPI_ISL_3805422		2021-08-03	Coahuila	13	Male		GK	AY.26
	hCoV-19/Mexico/COA_LANGEBIO_IMSS_2217/2021	EPI_ISL_4549912		2021-08-28	Coahuila	72	Male		GK	AY.20
	hCoV-19/Mexico/COA_LANGEBIO_IMSS_2225/2021	EPI_ISL_4549913		2021-08-27	Coahuila	43	Female		GK	AY.20
	hCoV-19/Mexico/COA_LANGEBIO_IMSS_2226/2021	EPI_ISL_4549914		2021-08-27	Coahuila	38	Female		GK	AY.100
	hCoV-19/Mexico/COA_LANGEBIO_IMSS_2227/2021	EPI_ISL_4549915		2021-08-27	Coahuila	43	Female		GK	AY.122
	hCoV-19/Mexico/COA_LANGEBIO_IMSS_2228/2021	EPI_ISL_4549916		2021-08-27	Coahuila	24	Female		GK	AY.75
	hCoV-19/Mexico/COA_LANGEBIO_IMSS_2229/2021	EPI_ISL_4549917		2021-08-27	Coahuila	31	Female		GK	AY.100
	hCoV-19/Mexico/COA_LANGEBIO_IMSS_2234/2021	EPI_ISL_4549918		2021-08-30	Coahuila	15	Male		GK	AY.100
	hCoV-19/Mexico/COA_LANGEBIO_IMSS_2237/2021	EPI_ISL_4549919		2021-08-29	Coahuila	66	Female		GK	AY.103
	hCoV-19/Mexico/COA_LANGEBIO_IMSS_2243/2021	EPI_ISL_4549920		2021-08-30	Coahuila	21	Male		GK	AY.26
	hCoV-19/Mexico/COA_LANGEBIO_IMSS_2244/2021	EPI_ISL_4549921		2021-08-30	Coahuila	12	Female		GK	AY.26
	hCoV-19/Mexico/COA_LANGEBIO_IMSS_2245/2021	EPI_ISL_4549922		2021-08-30	Coahuila	27	Male		GK	AY.20
	hCoV-19/Mexico/COA_LANGEBIO_IMSS_2246/2021	EPI_ISL_4549923		2021-08-26	Coahuila	22	Male		GK	AY.100
	hCoV-19/Mexico/COA_LANGEBIO_IMSS_2247/2021	EPI_ISL_4549924		2021-08-27	Coahuila	68	Male		GK	AY.20
	hCoV-19/Mexico/COA_LANGEBIO_IMSS_2248/2021	EPI_ISL_4549925		2021-08-27	Coahuila	25	Male		GK	AY.100
	hCoV-19/Mexico/COA_LANGEBIO_IMSS_2249/2021	EPI_ISL_4549926		2021-08-26	Coahuila	61	Female		GK	AY.26
	hCoV-19/Mexico/COA_LANGEBIO_IMSS_2251/2021	EPI_ISL_4549928		2021-08-26	Coahuila	70	Male		GK	AY.100
	hCoV-19/Mexico/COA_LANGEBIO_IMSS_2252/2021	EPI_ISL_4549929		2021-08-26	Coahuila	30	Female		GK	AY.47
	hCoV-19/Mexico/COA_LANGEBIO_IMSS_2253/2021	EPI_ISL_4549930		2021-08-25	Coahuila	72	Male		GK	AY.100
	hCoV-19/Mexico/COA_LANGEBIO_IMSS_2254/2021	EPI_ISL_4549931		2021-08-26	Coahuila	58	Male		GK	AY.20
	hCoV-19/Mexico/COA_LANGEBIO_IMSS_2255/2021	EPI_ISL_4549932		2021-08-25	Coahuila	46	Male		GK	AY.26
	hCoV-19/Mexico/COA_LANGEBIO_IMSS_2256/2021	EPI_ISL_4549933		2021-08-26	Coahuila	65	Male		GK	AY.20
	hCoV-19/Mexico/COA_LANGEBIO_IMSS_2257/2021	EPI_ISL_4549934		2021-08-26	Coahuila	77	Male		GK	AY.100
	hCoV-19/Mexico/COA_LANGEBIO_IMSS_2259/2021	EPI_ISL_4549935		2021-09-01	Coahuila	83	Male		GK	AY.26
	hCoV-19/Mexico/COA_LANGEBIO_IMSS_2260/2021	EPI_ISL_4549936		2021-09-01	Coahuila	43	Female		GK	AY.26
	hCoV-19/Mexico/COA_LANGEBIO_IMSS_2262/2021	EPI_ISL_4549937		2021-09-02	Coahuila	23	Female		GK	AY.20
	hCoV-19/Mexico/COA_LANGEBIO_IMSS_2676/2021	EPI_ISL_5850695		2021-09-27	Coahuila	24	Female		GK	AY.20
	hCoV-19/Mexico/COA_LANGEBIO_IMSS_2677/2021	EPI_ISL_5850696		2021-09-27	Coahuila	41	Female		GK	AY.100
	hCoV-19/Mexico/COA_LANGEBIO_IMSS_2678/2021	EPI_ISL_5850697		2021-09-27	Coahuila	58	Female		GK	AY.100
	hCoV-19/Mexico/COA_LANGEBIO_IMSS_2679/2021	EPI_ISL_5850698		2021-09-23	Coahuila	40	Male		GK	AY.26
	hCoV-19/Mexico/COA_LANGEBIO_IMSS_2680/2021	EPI_ISL_5850699		2021-09-24	Coahuila	26	Male		GK	AY.20
	hCoV-19/Mexico/COA_LANGEBIO_IMSS_2681/2021	EPI_ISL_5850700		2021-09-27	Coahuila	29	Female		GK	AY.13
	hCoV-19/Mexico/COA_LANGEBIO_IMSS_2682/2021	EPI_ISL_5850701		2021-09-27	Coahuila	39	Female		GK	AY.100
	hCoV-19/Mexico/COA_LANGEBIO_IMSS_2683/2021	EPI_ISL_5850702		2021-09-27	Coahuila	32	Female		GK	AY.100
	hCoV-19/Mexico/COA_LANGEBIO_IMSS_2684/2021	EPI_ISL_5850703		2021-09-27	Coahuila	38	Female		GK	AY.100
	hCoV-19/Mexico/COA_LANGEBIO_IMSS_2685/2021	EPI_ISL_5850704		2021-09-27	Coahuila	65	Female		GK	AY.100
	hCoV-19/Mexico/COA_LANGEBIO_IMSS_2686/2021	EPI_ISL_5850705		2021-09-27	Coahuila	23	Male		GK	AY.100
	hCoV-19/Mexico/COA_LANGEBIO_IMSS_2687/2021	EPI_ISL_5850706		2021-09-27	Coahuila	6	Male		GK	AY.26
	hCoV-19/Mexico/COA_LANGEBIO_IMSS_2688/2021	EPI_ISL_5850707		2021-09-27	Coahuila	17	Male		GK	AY.26
	hCoV-19/Mexico/COA_LANGEBIO_IMSS_2697/2021	EPI_ISL_5850716		2021-09-25	Coahuila	9	Female		GK	AY.103
	hCoV-19/Mexico/COA_LANGEBIO_IMSS_2698/2021	EPI_ISL_5850717		2021-09-25	Coahuila	29	Male		GK	AY.25
	hCoV-19/Mexico/COA_LANGEBIO_IMSS_2699/2021	EPI_ISL_5850718		2021-09-27	Coahuila	60	Female		GK	AY.103
	hCoV-19/Mexico/COA_LANGEBIO_IMSS_2727/2021	EPI_ISL_5850746		2021-09-29	Coahuila	40	Female		GK	AY.20
	hCoV-19/Mexico/COA_LANGEBIO_IMSS_2745/2021	EPI_ISL_5850764		2021-09-30	Coahuila	56	Female		GK	AY.20
	hCoV-19/Mexico/COA_LANGEBIO_IMSS_2747/2021	EPI_ISL_5850766		2021-09-29	Coahuila	44	Female		GK	AY.20
	hCoV-19/Mexico/COA_LANGEBIO_IMSS_2748/2021	EPI_ISL_5850767		2021-09-30	Coahuila	33	Male		GK	AY.20
	hCoV-19/Mexico/COA_LANGEBIO_IMSS_3133/2021	EPI_ISL_6775718		2021-10-20	Coahuila	14	Male		GK	AY.20
	hCoV-19/Mexico/COA_LANGEBIO_IMSS_3134/2021	EPI_ISL_6775719		2021-10-19	Coahuila	7	Male		GK	AY.20
	hCoV-19/Mexico/COA_LANGEBIO_IMSS_3135/2021	EPI_ISL_6775720		2021-10-23	Coahuila	90	Female		GK	AY.103
	hCoV-19/Mexico/COA_LANGEBIO_IMSS_3136/2021	EPI_ISL_6775721		2021-10-23	Coahuila	81	Male		GK	AY.103
	hCoV-19/Mexico/COA_LANGEBIO_IMSS_3137/2021	EPI_ISL_6775722		2021-10-21	Coahuila	68	Female		GK	AY.75
	hCoV-19/Mexico/COA_LANGEBIO_IMSS_3138/2021	EPI_ISL_6775723		2021-10-23	Coahuila	79	Female		GK	AY.103
	hCoV-19/Mexico/COA_LANGEBIO_IMSS_3139/2021	EPI_ISL_6775724		2021-10-19	Coahuila	23	Female		GK	AY.100
	hCoV-19/Mexico/COA_LANGEBIO_IMSS_3140/2021	EPI_ISL_6775725		2021-10-20	Coahuila	26	Male		GK	AY.100
	hCoV-19/Mexico/COA_LANGEBIO_IMSS_3162/2021	EPI_ISL_6775816		2021-10-27	Coahuila	45	Female		GK	AY.20
	hCoV-19/Mexico/COA_LANGEBIO_IMSS_3179/2021	EPI_ISL_6775726		2021-10-27	Coahuila	65	Male		GK	AY.20
	hCoV-19/Mexico/COA_LANGEBIO_IMSS_3180/2021	EPI_ISL_6775727		2021-10-27	Coahuila	59	Male		GK	AY.20
	hCoV-19/Mexico/COA_LANGEBIO_IMSS_3181/2021	EPI_ISL_6775728		2021-10-26	Coahuila	54	Male		GK	B.1.617.2
	hCoV-19/Mexico/COA_LANGEBIO_IMSS_3467/2021	EPI_ISL_6775729		2021-10-01	Coahuila	75	Male		GK	AY.26
	hCoV-19/Mexico/COA_LANGEBIO_IMSS_3485/2021	EPI_ISL_6775730		2021-10-04	Coahuila	50	Female		GK	AY.20
	hCoV-19/Mexico/COA_LANGEBIO_IMSS_3486/2021	EPI_ISL_6775731		2021-10-04	Coahuila	51	Female		GK	AY.113
	hCoV-19/Mexico/COA_LANGEBIO_IMSS_3487/2021	EPI_ISL_6775732		2021-09-28	Coahuila	79	Female		GK	AY.100
	hCoV-19/Mexico/COA_LANGEBIO_IMSS_3488/2021	EPI_ISL_6775733		2021-10-01	Coahuila	61	Male		GK	AY.103
	hCoV-19/Mexico/COA_LANGEBIO_IMSS_3489/2021	EPI_ISL_6775734		2021-10-01	Coahuila	71	Female		GK	AY.20
	hCoV-19/Mexico/COA_LANGEBIO_IMSS_3492/2021	EPI_ISL_6775735		2021-10-06	Coahuila	0	Female		GK	AY.43
	hCoV-19/Mexico/COA_LANGEBIO_IMSS_3493/2021	EPI_ISL_6775736		2021-10-05	Coahuila	88	Male		GK	AY.103
	hCoV-19/Mexico/COA_LANGEBIO_IMSS_3494/2021	EPI_ISL_6775817		2021-10-06	Coahuila	52	Male		GK	AY.20
	hCoV-19/Mexico/COA_LANGEBIO_IMSS_3495/2021	EPI_ISL_6775737		2021-10-06	Coahuila	88	Male		GK	AY.25
	hCoV-19/Mexico/COA_LANGEBIO_IMSS_3496/2021	EPI_ISL_6775738		2021-10-07	Coahuila	42	Female		GK	AY.26
	hCoV-19/Mexico/COA_LANGEBIO_IMSS_3497/2021	EPI_ISL_6775739		2021-10-06	Coahuila	44	Male		GK	AY.100
	hCoV-19/Mexico/COA_LANGEBIO_IMSS_3498/2021	EPI_ISL_6775740		2021-10-07	Coahuila	58	Male		GK	AY.3
	hCoV-19/Mexico/COA_LANGEBIO_IMSS_3499/2021	EPI_ISL_6775741		2021-10-07	Coahuila	74	Female		GK	AY.20
	hCoV-19/Mexico/COA_LANGEBIO_IMSS_3500/2021	EPI_ISL_6775742		2021-10-03	Coahuila	28	Male		GK	B.1.617.2
	hCoV-19/Mexico/COA_LANGEBIO_IMSS_93294_NC/2021	EPI_ISL_4549938		2021-08-30	Coahuila	40	Male		GK	AY.25
	hCoV-19/Mexico/COA_LANGEBIO_IMSS_93458_NC/2021	EPI_ISL_4549939		2021-08-24	Coahuila	53	Male		GK	AY.20
	hCoV-19/Mexico/COA-INER_IMSS_1398/2021	EPI_ISL_3155408		2021-07-03	Coahuila	19	Female		GK	AY.26
	hCoV-19/Mexico/COA-INER_IMSS_1419/2021	EPI_ISL_3155429		2021-07-07	Coahuila	32	Female		GK	AY.26
	hCoV-19/Mexico/COA-INER_IMSS_1422/2021	EPI_ISL_3155432		2021-07-07	Coahuila	28	Female		GK	AY.3
	hCoV-19/Mexico/COA-LANGEBIO_IMSS_1686/2021	EPI_ISL_2942776		2021-06-30	Coahuila	58	Female		G	AY.26
	hCoV-19/Mexico/COA-LANGEBIO_IMSS_1691/2021	EPI_ISL_2942780		2021-07-01	Coahuila	26	Female		G	AY.105
	hCoV-19/Mexico/COA-LANGEBIO_IMSS_1697/2021	EPI_ISL_2942786		2021-06-30	Coahuila	28	Female		G	AY.20
	hCoV-19/Mexico/COL_IBT_IMSS_2189/2021	EPI_ISL_3347813		2021-07-12	Colima	52	Female		GK	AY.26
	hCoV-19/Mexico/COL_IBT_IMSS_2198/2021	EPI_ISL_3347822		2021-07-12	Colima	36	Female		GK	AY.20
	hCoV-19/Mexico/COL_IBT_IMSS_2199/2021	EPI_ISL_3347823		2021-07-13	Colima	87	Male		GK	AY.20
	hCoV-19/Mexico/COL_IBT_IMSS_2232/2021	EPI_ISL_3347848		2021-07-18	Colima	31	Female		GK	AY.20
	hCoV-19/Mexico/COL_IBT_IMSS_2248/2021	EPI_ISL_3347862		2021-07-19	Colima	37	Male		GK	AY.26
	hCoV-19/Mexico/COL_IBT_IMSS_2249/2021	EPI_ISL_3347518		2021-07-19	Colima	66	Male		GK	AY.20
	hCoV-19/Mexico/COL_IBT_IMSS_2250/2021	EPI_ISL_3347864		2021-07-19	Colima	73	Female		GK	AY.20
	hCoV-19/Mexico/COL_IBT_IMSS_2267/2021	EPI_ISL_3347878		2021-07-20	Colima	66	Male		GK	AY.20
	hCoV-19/Mexico/COL_IBT_IMSS_2268/2021	EPI_ISL_3347879		2021-07-20	Colima	35	Female		GK	AY.20
	hCoV-19/Mexico/COL_IBT_IMSS_2275/2021	EPI_ISL_3347882		2021-07-21	Colima	58	Female		GK	AY.20
	hCoV-19/Mexico/COL_IBT_IMSS_2276/2021	EPI_ISL_3347883		2021-07-22	Colima	37	Male		GK	AY.20
	hCoV-19/Mexico/COL_IBT_IMSS_2660/2021	EPI_ISL_4006559		2021-08-10	Colima	17	Male		GK	AY.20
	hCoV-19/Mexico/COL_IBT_IMSS_2682/2021	EPI_ISL_4006581		2021-08-08	Colima	78	Male		GK	AY.20
	hCoV-19/Mexico/COL_IBT_IMSS_2687/2021	EPI_ISL_4006586		2021-08-07	Colima	75	Male		GK	AY.20
	hCoV-19/Mexico/COL_IBT_IMSS_2699/2021	EPI_ISL_4006598		2021-08-12	Colima	34	Male		GK	AY.20
	hCoV-19/Mexico/COL_IBT_IMSS_2700/2021	EPI_ISL_4006599		2021-08-12	Colima	86	Male		GK	AY.13
	hCoV-19/Mexico/COL_IBT_IMSS_2702/2021	EPI_ISL_4006601		2021-08-13	Colima	66	Male		GK	AY.20
	hCoV-19/Mexico/COL_IBT_IMSS_2724/2021	EPI_ISL_4006623		2021-08-15	Colima	79	Female		GK	AY.26
	hCoV-19/Mexico/COL_IBT_IMSS_2725/2021	EPI_ISL_4006624		2021-08-15	Colima	57	Female		GK	AY.20
	hCoV-19/Mexico/COL_IBT_IMSS_2726/2021	EPI_ISL_4006625		2021-08-15	Colima	77	Female		GK	AY.20
	hCoV-19/Mexico/COL_IBT_IMSS_2727/2021	EPI_ISL_4006626		2021-08-15	Colima	83	Female		GK	AY.20
	hCoV-19/Mexico/COL_IBT_IMSS_2728/2021	EPI_ISL_4006627		2021-08-15	Colima	73	Male		GK	AY.3
	hCoV-19/Mexico/COL_IBT_IMSS_2729/2021	EPI_ISL_4006628		2021-08-15	Colima	60	Female		GK	AY.20
	hCoV-19/Mexico/COL_IBT_IMSS_2730/2021	EPI_ISL_4006629		2021-08-15	Colima	32	Male		GK	AY.20
	hCoV-19/Mexico/COL_IBT_IMSS_2731/2021	EPI_ISL_4006630		2021-08-15	Colima	33	Male		GK	B.1.617.2
	hCoV-19/Mexico/COL_IBT_IMSS_2732/2021	EPI_ISL_4006631		2021-08-15	Colima	86	Male		GK	AY.20
	hCoV-19/Mexico/COL_IBT_IMSS_2733/2021	EPI_ISL_4006632		2021-08-14	Colima	49	Male		GK	AY.20
	hCoV-19/Mexico/COL_IBT_IMSS_2740/2021	EPI_ISL_4006639		2021-08-16	Colima	38	Female		GK	AY.20
	hCoV-19/Mexico/COL_IBT_IMSS_2741/2021	EPI_ISL_4006640		2021-08-16	Colima	74	Female		GK	AY.26
	hCoV-19/Mexico/COL_IBT_IMSS_2742/2021	EPI_ISL_4006641		2021-08-16	Colima	67	Female		GK	AY.20
	hCoV-19/Mexico/COL_IBT_IMSS_2743/2021	EPI_ISL_4006642		2021-08-16	Colima	61	Female		GK	AY.26
	hCoV-19/Mexico/COL_IBT_IMSS_2744/2021	EPI_ISL_4006643		2021-08-16	Colima	65	Female		GK	AY.20
	hCoV-19/Mexico/COL_IBT_IMSS_2745/2021	EPI_ISL_4006644		2021-08-16	Colima	30	Male		GK	AY.3
	hCoV-19/Mexico/COL_IBT_IMSS_2746/2021	EPI_ISL_4006645		2021-08-14	Colima	83	Male		GK	AY.20
	hCoV-19/Mexico/COL_IBT_IMSS_2747/2021	EPI_ISL_4006646		2021-08-14	Colima	67	Male		GK	AY.3
	hCoV-19/Mexico/COL_IBT_IMSS_2761/2021	EPI_ISL_4006660		2021-08-17	Colima	35	Male		GK	AY.20
	hCoV-19/Mexico/COL_IBT_IMSS_3182/2021	EPI_ISL_4878846		2021-09-04	Colima	41	Male		GK	AY.26
	hCoV-19/Mexico/COL_IBT_IMSS_3183/2021	EPI_ISL_4878847		2021-09-04	Colima	58	Male		GK	AY.20
	hCoV-19/Mexico/COL_IBT_IMSS_3189/2021	EPI_ISL_4879023		2021-09-05	Colima	68	Female		GK	AY.20
	hCoV-19/Mexico/COL_IBT_IMSS_3214/2021	EPI_ISL_4878874		2021-09-07	Colima	47	Female		GK	AY.26
	hCoV-19/Mexico/COL_IBT_IMSS_3215/2021	EPI_ISL_4878875		2021-09-07	Colima	68	Male		GK	AY.26
	hCoV-19/Mexico/COL_IBT_IMSS_3216/2021	EPI_ISL_4878876		2021-09-06	Colima	35	Male		GK	AY.20
	hCoV-19/Mexico/COL_IBT_IMSS_3217/2021	EPI_ISL_4878877		2021-09-06	Colima	66	Female		GK	AY.20
	hCoV-19/Mexico/COL_IBT_IMSS_3218/2021	EPI_ISL_4878878		2021-09-05	Colima	51	Female		GK	AY.20
	hCoV-19/Mexico/COL_IBT_IMSS_3219/2021	EPI_ISL_4878879		2021-09-03	Colima	56	Female		GK	AY.20
	hCoV-19/Mexico/COL_IBT_IMSS_3220/2021	EPI_ISL_4878880		2021-09-04	Colima	90	Female		GK	AY.20
	hCoV-19/Mexico/COL_IBT_IMSS_3226/2021	EPI_ISL_4878885		2021-09-08	Colima	53	Male		GK	AY.20
	hCoV-19/Mexico/COL_IBT_IMSS_3227/2021	EPI_ISL_4878886		2021-09-07	Colima	66	Male		GK	AY.20
	hCoV-19/Mexico/COL_IBT_IMSS_3228/2021	EPI_ISL_4878887		2021-09-07	Colima	49	Male		GK	AY.26
	hCoV-19/Mexico/COL_IBT_IMSS_3229/2021	EPI_ISL_4878888		2021-09-07	Colima	51	Male		GK	AY.26
	hCoV-19/Mexico/COL_IBT_IMSS_3230/2021	EPI_ISL_4878889		2021-09-07	Colima	70	Female		GK	AY.26
	hCoV-19/Mexico/COL_IBT_IMSS_3231/2021	EPI_ISL_4878890		2021-09-06	Colima	33	Male		GK	AY.20
	hCoV-19/Mexico/COL_IBT_IMSS_3235/2021	EPI_ISL_4878894		2021-09-08	Colima	42	Male		GK	AY.20
	hCoV-19/Mexico/COL_IBT_IMSS_3236/2021	EPI_ISL_4878895		2021-09-09	Colima	36	Male		GK	AY.20
	hCoV-19/Mexico/COL_IBT_IMSS_3237/2021	EPI_ISL_4879053		2021-09-08	Colima	64	Female		GK	AY.44
	hCoV-19/Mexico/COL_IBT_IMSS_3238/2021	EPI_ISL_4878896		2021-09-08	Colima	50	Male		GK	AY.20
	hCoV-19/Mexico/COL_IBT_IMSS_3239/2021	EPI_ISL_4878897		2021-09-07	Colima	40	Male		GK	AY.26
	hCoV-19/Mexico/COL_IBT_IMSS_3240/2021	EPI_ISL_4878898		2021-09-07	Colima	77	Male		GK	AY.20
	hCoV-19/Mexico/COL_IBT_IMSS_3241/2021	EPI_ISL_4878899		2021-09-07	Colima	58	Female		GK	AY.20
	hCoV-19/Mexico/COL_IBT_IMSS_3279/2021	EPI_ISL_4878939		2021-09-11	Colima	64	Female		GK	AY.20
	hCoV-19/Mexico/COL_IBT_IMSS_3280/2021	EPI_ISL_4878940		2021-09-10	Colima	52	Female		GK	AY.26
	hCoV-19/Mexico/COL_IBT_IMSS_3649/2021	EPI_ISL_5936947		2021-10-03	Colima	76	Male		GK	AY.25
	hCoV-19/Mexico/COL_IBT_IMSS_3650/2021	EPI_ISL_5936948		2021-10-03	Colima	79	Female		GK	AY.20
	hCoV-19/Mexico/COL_IBT_IMSS_3655/2021	EPI_ISL_5936949		2021-09-30	Colima	66	Male		GK	AY.20
	hCoV-19/Mexico/COL_IBT_IMSS_3656/2021	EPI_ISL_5936639		2021-10-01	Colima	68	Male		GK	AY.100
	hCoV-19/Mexico/COL_IBT_IMSS_3657/2021	EPI_ISL_5936950		2021-10-02	Colima	52	Male		GK	AY.20
	hCoV-19/Mexico/COL_IBT_IMSS_3658/2021	EPI_ISL_5936951		2021-10-03	Colima	74	Female		GK	AY.26
	hCoV-19/Mexico/COL_IBT_IMSS_3674/2021	EPI_ISL_5936952		2021-10-03	Colima	74	Female		GK	AY.26
	hCoV-19/Mexico/COL_IBT_IMSS_3675/2021	EPI_ISL_5936664		2021-10-04	Colima	87	Male		GK	AY.26
	hCoV-19/Mexico/COL_IBT_IMSS_3676/2021	EPI_ISL_5936633		2021-10-03	Colima	56	Male		GK	AY.20
	hCoV-19/Mexico/COL_IBT_IMSS_3677/2021	EPI_ISL_5936657		2021-10-02	Colima	12	Male		GK	AY.46.6
	hCoV-19/Mexico/COL_IBT_IMSS_3678/2021	EPI_ISL_5936953		2021-10-03	Colima	29	Male		GK	AY.20
	hCoV-19/Mexico/COL_IBT_IMSS_3698/2021	EPI_ISL_5936568		2021-10-05	Colima	64	Male		GK	AY.20
	hCoV-19/Mexico/COL_IBT_IMSS_3699/2021	EPI_ISL_5936954		2021-10-04	Colima	22	Female		GK	AY.20
	hCoV-19/Mexico/COL_IBT_IMSS_3724/2021	EPI_ISL_5936955		2021-10-06	Colima	77	Male		GK	AY.3
	hCoV-19/Mexico/COL_IBT_IMSS_3725/2021	EPI_ISL_5936956		2021-10-06	Colima	61	Female		GK	AY.3
	hCoV-19/Mexico/COL_IBT_IMSS_3754/2021	EPI_ISL_5936583		2021-10-07	Colima	62	Male		GK	AY.20
	hCoV-19/Mexico/COL_IBT_IMSS_3755/2021	EPI_ISL_5936957		2021-10-07	Colima	84	Male		GK	AY.3
	hCoV-19/Mexico/COL_IBT_IMSS_4080/2021	EPI_ISL_6863708		2021-10-29	Colima	70	Male		GK	AY.44
	hCoV-19/Mexico/COL_IBT_IMSS_4081/2021	EPI_ISL_6863709		2021-10-31	Colima	54	Female		GK	AY.20
	hCoV-19/Mexico/COL_IBT_IMSS_4104/2021	EPI_ISL_6863732		2021-11-02	Colima	58	Male		GK	AY.20
	hCoV-19/Mexico/COL_IBT_IMSS_4105/2021	EPI_ISL_6863733		2021-11-03	Colima	46	Male		GK	AY.26
	hCoV-19/Mexico/COL_IBT_IMSS_4106/2021	EPI_ISL_6863734		2021-11-03	Colima	81	Male		GK	AY.20
	hCoV-19/Mexico/COL_IBT_IMSS_4134/2021	EPI_ISL_6863763		2021-11-04	Colima	66	Female		GK	AY.100
	hCoV-19/Mexico/COL_IBT_IMSS_4141/2021	EPI_ISL_6863771		2021-11-08	Colima	66	Male		GK	AY.26
	hCoV-19/Mexico/COL_INER_IMSS_1804/2021	EPI_ISL_3557075		2021-07-29	Colima	23	Male		GK	AY.20
	hCoV-19/Mexico/COL_INER_IMSS_1936/2021	EPI_ISL_3557207		2021-07-23	Colima	46	Male		GK	AY.20
	hCoV-19/Mexico/COL_INER_IMSS_1937/2021	EPI_ISL_3557209		2021-07-28	Colima	45	Female		GK	AY.20
	hCoV-19/Mexico/COL_INER_IMSS_1938/2021	EPI_ISL_3557210		2021-07-28	Colima	73	Male		GK	AY.26
	hCoV-19/Mexico/COL_INER_IMSS_1948/2021	EPI_ISL_3557220		2021-07-28	Colima	80	Female		GK	AY.20
	hCoV-19/Mexico/COL_INER_IMSS_1949/2021	EPI_ISL_3557221		2021-07-28	Colima	33	Female		GK	AY.26
	hCoV-19/Mexico/COL_INER_IMSS_1952/2021	EPI_ISL_3557224		2021-07-29	Colima	48	Male		GK	AY.20
	hCoV-19/Mexico/COL_INER_IMSS_1954/2021	EPI_ISL_3557226		2021-07-29	Colima	38	Male		GK	AY.20
	hCoV-19/Mexico/COL_INER_IMSS_1955/2021	EPI_ISL_3557227		2021-07-30	Colima	31	Male		GK	AY.26
	hCoV-19/Mexico/COL_INER_IMSS_1956/2021	EPI_ISL_3557228		2021-07-30	Colima	65	Male		GK	AY.26
	hCoV-19/Mexico/COL_INER_IMSS_1957/2021	EPI_ISL_3557229		2021-07-29	Colima	75	Male		GK	AY.20
	hCoV-19/Mexico/COL_INER_IMSS_1958/2021	EPI_ISL_3557230		2021-07-29	Colima	69	Male		GK	AY.3
	hCoV-19/Mexico/COL_INER_IMSS_1959/2021	EPI_ISL_3557231		2021-07-27	Colima	38	Male		GK	AY.20
	hCoV-19/Mexico/COL_INER_IMSS_1960/2021	EPI_ISL_3557232		2021-07-27	Colima	63	Female		GK	AY.20
	hCoV-19/Mexico/COL_INER_IMSS_1968/2021	EPI_ISL_3557240		2021-07-30	Colima	60	Male		GK	AY.20
	hCoV-19/Mexico/COL_INER_IMSS_2266/2021	EPI_ISL_4299689		2021-08-22	Colima	79	Male		GK	AY.20
	hCoV-19/Mexico/COL_INER_IMSS_2267/2021	EPI_ISL_4299690		2021-08-23	Colima	70	Female		GK	AY.20
	hCoV-19/Mexico/COL_INER_IMSS_2268/2021	EPI_ISL_4299691		2021-08-23	Colima	38	Male		GK	AY.20
	hCoV-19/Mexico/COL_INER_IMSS_2269/2021	EPI_ISL_4299692		2021-08-22	Colima	68	Male		GK	AY.20
	hCoV-19/Mexico/COL_INER_IMSS_2276/2021	EPI_ISL_4299699		2021-08-24	Colima	65	Male		GK	AY.20
	hCoV-19/Mexico/COL_INER_IMSS_2277/2021	EPI_ISL_4299700		2021-08-24	Colima	70	Male		GK	AY.26
	hCoV-19/Mexico/COL_INER_IMSS_2278/2021	EPI_ISL_4299701		2021-08-24	Colima	56	Male		GK	AY.26
	hCoV-19/Mexico/COL_INER_IMSS_2279/2021	EPI_ISL_4299702		2021-08-22	Colima	68	Male		GK	AY.20
	hCoV-19/Mexico/COL_INER_IMSS_2280/2021	EPI_ISL_4299703		2021-08-21	Colima	92	Female		GK	AY.26
	hCoV-19/Mexico/COL_INER_IMSS_2298/2021	EPI_ISL_4299721		2021-08-25	Colima	38	Male		GK	AY.20
	hCoV-19/Mexico/COL_INER_IMSS_2299/2021	EPI_ISL_4299722		2021-08-25	Colima	52	Female		GK	AY.20
	hCoV-19/Mexico/COL_INER_IMSS_2300/2021	EPI_ISL_4299723		2021-08-26	Colima	50	Female		GK	AY.26
	hCoV-19/Mexico/COL_INER_IMSS_2301/2021	EPI_ISL_4299724		2021-08-25	Colima	53	Male		GK	AY.26
	hCoV-19/Mexico/COL_INER_IMSS_2660/2021	EPI_ISL_5194225		2021-09-22	Colima	68	Female		GK	AY.20
	hCoV-19/Mexico/COL_INER_IMSS_2999/2021	EPI_ISL_6227407		2021-10-14	Colima	84	Male		GK	AY.3
	hCoV-19/Mexico/COL_LANGEBIO_IMSS_2206/2021	EPI_ISL_3805758		2021-07-31	Colima	27	Male		GK	AY.20
	hCoV-19/Mexico/COL_LANGEBIO_IMSS_2207/2021	EPI_ISL_3805376		2021-07-31	Colima	57	Female		GK	AY.20
	hCoV-19/Mexico/COL_LANGEBIO_IMSS_2208/2021	EPI_ISL_3805391		2021-07-31	Colima	64	Female		GK	AY.20
	hCoV-19/Mexico/COL_LANGEBIO_IMSS_2225/2021	EPI_ISL_3805403		2021-08-02	Colima	72	Male		GK	AY.20
	hCoV-19/Mexico/COL_LANGEBIO_IMSS_2226/2021	EPI_ISL_3805356		2021-08-02	Colima	45	Male		GK	AY.20
	hCoV-19/Mexico/COL_LANGEBIO_IMSS_2261/2021	EPI_ISL_3805335		2021-07-28	Colima	36	Male		GK	AY.20
	hCoV-19/Mexico/COL_LANGEBIO_IMSS_2262/2021	EPI_ISL_3805308		2021-07-29	Colima	22	Male		GK	AY.26
	hCoV-19/Mexico/COL_LANGEBIO_IMSS_2263/2021	EPI_ISL_3805398		2021-08-02	Colima	66	Male		GK	AY.20
	hCoV-19/Mexico/COL_LANGEBIO_IMSS_2264/2021	EPI_ISL_3805377		2021-08-02	Colima	58	Male		GK	AY.20
	hCoV-19/Mexico/COL_LANGEBIO_IMSS_2291/2021	EPI_ISL_3805420		2021-08-03	Colima	90	Female		GK	AY.3
	hCoV-19/Mexico/COL_LANGEBIO_IMSS_2292/2021	EPI_ISL_3805350		2021-08-03	Colima	42	Female		GK	AY.20
	hCoV-19/Mexico/COL_LANGEBIO_IMSS_2293/2021	EPI_ISL_3805374		2021-08-01	Colima	56	Female		GK	AY.20
	hCoV-19/Mexico/COL_LANGEBIO_IMSS_2294/2021	EPI_ISL_3805355		2021-08-02	Colima	44	Male		GK	AY.20
	hCoV-19/Mexico/COL_LANGEBIO_IMSS_2301/2021	EPI_ISL_3805357		2021-08-04	Colima	46	Male		GK	AY.26
	hCoV-19/Mexico/COL_LANGEBIO_IMSS_2302/2021	EPI_ISL_3805417		2021-08-04	Colima	84	Female		GK	AY.20
	hCoV-19/Mexico/COL_LANGEBIO_IMSS_2303/2021	EPI_ISL_3805404		2021-08-05	Colima	72	Female		GK	AY.26
	hCoV-19/Mexico/COL_LANGEBIO_IMSS_2304/2021	EPI_ISL_3805298		2021-08-04	Colima	0	Male		GK	AY.20
	hCoV-19/Mexico/COL_LANGEBIO_IMSS_2305/2021	EPI_ISL_3805371		2021-08-05	Colima	53	Female		GK	AY.26
	hCoV-19/Mexico/COL_LANGEBIO_IMSS_2306/2021	EPI_ISL_3805409		2021-08-04	Colima	75	Male		GK	AY.44
	hCoV-19/Mexico/COL_LANGEBIO_IMSS_2307/2021	EPI_ISL_3805325		2021-08-04	Colima	32	Male		GK	AY.20
	hCoV-19/Mexico/COL_LANGEBIO_IMSS_2308/2021	EPI_ISL_3805336		2021-08-04	Colima	36	Female		GK	AY.26
	hCoV-19/Mexico/COL_LANGEBIO_IMSS_2318/2021	EPI_ISL_3805400		2021-08-05	Colima	70	Female		GK	AY.20
	hCoV-19/Mexico/COL_LANGEBIO_IMSS_2319/2021	EPI_ISL_3805316		2021-08-05	Colima	26	Male		GK	AY.20
	hCoV-19/Mexico/COL_LANGEBIO_IMSS_2320/2021	EPI_ISL_3805381		2021-08-05	Colima	60	Male		GK	AY.20
	hCoV-19/Mexico/COL_LANGEBIO_IMSS_2534/2021	EPI_ISL_4549940		2021-08-29	Colima	52	Male		GK	AY.20
	hCoV-19/Mexico/COL_LANGEBIO_IMSS_2535/2021	EPI_ISL_4549941		2021-08-28	Colima	61	Male		GK	AY.20
	hCoV-19/Mexico/COL_LANGEBIO_IMSS_2536/2021	EPI_ISL_4549942		2021-08-28	Colima	83	Female		GK	AY.20
	hCoV-19/Mexico/COL_LANGEBIO_IMSS_2537/2021	EPI_ISL_4549943		2021-08-27	Colima	61	Female		GK	AY.20
	hCoV-19/Mexico/COL_LANGEBIO_IMSS_2538/2021	EPI_ISL_4549944		2021-08-27	Colima	77	Male		GK	AY.26
	hCoV-19/Mexico/COL_LANGEBIO_IMSS_2539/2021	EPI_ISL_4549945		2021-08-27	Colima	83	Male		GK	AY.20
	hCoV-19/Mexico/COL_LANGEBIO_IMSS_2540/2021	EPI_ISL_4549946		2021-08-27	Colima	69	Male		GK	AY.20
	hCoV-19/Mexico/COL_LANGEBIO_IMSS_2541/2021	EPI_ISL_4549947		2021-08-27	Colima	43	Female		GK	AY.20
	hCoV-19/Mexico/COL_LANGEBIO_IMSS_2542/2021	EPI_ISL_4549948		2021-08-27	Colima	88	Female		GK	AY.20
	hCoV-19/Mexico/COL_LANGEBIO_IMSS_2580/2021	EPI_ISL_4549949		2021-08-29	Colima	55	Female		GK	AY.26
	hCoV-19/Mexico/COL_LANGEBIO_IMSS_2581/2021	EPI_ISL_4549950		2021-08-29	Colima	61	Female		GK	AY.26
	hCoV-19/Mexico/COL_LANGEBIO_IMSS_2582/2021	EPI_ISL_4549951		2021-08-30	Colima	57	Male		GK	AY.26
	hCoV-19/Mexico/COL_LANGEBIO_IMSS_2583/2021	EPI_ISL_4549952		2021-08-30	Colima	55	Male		GK	AY.26
	hCoV-19/Mexico/COL_LANGEBIO_IMSS_2584/2021	EPI_ISL_4549953		2021-08-31	Colima	63	Male		GK	AY.26
	hCoV-19/Mexico/COL_LANGEBIO_IMSS_2585/2021	EPI_ISL_4549954		2021-08-30	Colima	81	Male		GK	AY.26
	hCoV-19/Mexico/COL_LANGEBIO_IMSS_2608/2021	EPI_ISL_4549955		2021-08-28	Colima	72	Female		GK	AY.100
	hCoV-19/Mexico/COL_LANGEBIO_IMSS_2609/2021	EPI_ISL_4549956		2021-08-31	Colima	74	Female		GK	AY.20
	hCoV-19/Mexico/COL_LANGEBIO_IMSS_2610/2021	EPI_ISL_4549957		2021-08-31	Colima	76	Male		GK	AY.20
	hCoV-19/Mexico/COL_LANGEBIO_IMSS_2611/2021	EPI_ISL_4549958		2021-09-01	Colima	73	Female		GK	AY.100
	hCoV-19/Mexico/COL_LANGEBIO_IMSS_3028/2021	EPI_ISL_5851055		2021-09-24	Colima	78	Male		GK	AY.20
	hCoV-19/Mexico/COL_LANGEBIO_IMSS_3029/2021	EPI_ISL_5851056		2021-09-28	Colima	73	Female		GK	AY.20
	hCoV-19/Mexico/COL_LANGEBIO_IMSS_3030/2021	EPI_ISL_5851057		2021-09-27	Colima	84	Male		GK	AY.26
	hCoV-19/Mexico/COL_LANGEBIO_IMSS_3048/2021	EPI_ISL_5851080		2021-09-24	Colima	63	Male		GK	AY.20
	hCoV-19/Mexico/COL_LANGEBIO_IMSS_3049/2021	EPI_ISL_5851081		2021-09-28	Colima	64	Male		GK	AY.20
	hCoV-19/Mexico/COL_LANGEBIO_IMSS_3050/2021	EPI_ISL_5851082		2021-09-28	Colima	81	Male		GK	AY.20
	hCoV-19/Mexico/COL_LANGEBIO_IMSS_3071/2021	EPI_ISL_5851105		2021-09-28	Colima	97	Female		GK	AY.20
	hCoV-19/Mexico/COL_LANGEBIO_IMSS_3338/2021	EPI_ISL_6775709		2021-10-22	Colima	64	Male		GK	AY.20
	hCoV-19/Mexico/COL_LANGEBIO_IMSS_3339/2021	EPI_ISL_6775710		2021-10-23	Colima	58	Female		GK	AY.20
	hCoV-19/Mexico/COL_LANGEBIO_IMSS_3340/2021	EPI_ISL_6775711		2021-10-24	Colima	91	Female		GK	AY.44
	hCoV-19/Mexico/COL_LANGEBIO_IMSS_3391/2021	EPI_ISL_6775712		2021-10-26	Colima	31	Female		GK	AY.20
	hCoV-19/Mexico/COL_LANGEBIO_IMSS_3392/2021	EPI_ISL_6775713		2021-10-27	Colima	64	Female		GK	AY.44
	hCoV-19/Mexico/COL_LANGEBIO_IMSS_3393/2021	EPI_ISL_6775714		2021-10-27	Colima	74	Male		GK	AY.44
	hCoV-19/Mexico/COL_LANGEBIO_IMSS_3394/2021	EPI_ISL_6775715		2021-10-28	Colima	54	Male		GK	AY.3
	hCoV-19/Mexico/COL_LANGEBIO_IMSS_3395/2021	EPI_ISL_6775716		2021-10-26	Colima	81	Male		GK	AY.20
	hCoV-19/Mexico/COL_LANGEBIO_IMSS_3396/2021	EPI_ISL_6775717		2021-10-25	Colima	51	Female		GK	AY.26
	hCoV-19/Mexico/COL_LANGEBIO_IMSS_59633_NC/2021	EPI_ISL_4549959		2021-08-31	Colima	60	Male		GK	AY.20
	hCoV-19/Mexico/COL_LANGEBIO_IMSS_66845_NC/2021	EPI_ISL_5851106		2021-09-29	Colima	52	Male		GK	AY.20
	hCoV-19/Mexico/COL-INER_IMSS_1442/2021	EPI_ISL_3155452		2021-07-02	Colima	77	Male		GK	AY.20
	hCoV-19/Mexico/COL-INER_IMSS_1456/2021	EPI_ISL_3155466		2021-07-05	Colima	54	Male		GK	AY.20
	hCoV-19/Mexico/COL-INER_IMSS_1469/2021	EPI_ISL_3155479		2021-07-06	Colima	35	Female		GK	AY.20
	hCoV-19/Mexico/COL-LANGEBIO_IMSS_1637/2021	EPI_ISL_2942740		2021-07-02	Colima	22	Female		G	AY.26
	hCoV-19/Mexico/DUR_IBT_IMSS_2298/2021	EPI_ISL_3347617		2021-07-12	Durango	26	Male		GK	AY.26
	hCoV-19/Mexico/DUR_IBT_IMSS_2318/2021	EPI_ISL_3347632		2021-07-14	Durango	18	Male		GK	AY.26
	hCoV-19/Mexico/DUR_IBT_IMSS_2333/2021	EPI_ISL_3347644		2021-07-14	Durango	19	Male		GK	AY.26
	hCoV-19/Mexico/DUR_IBT_IMSS_2334/2021	EPI_ISL_3347645		2021-07-15	Durango	41	Male		GK	AY.100
	hCoV-19/Mexico/DUR_IBT_IMSS_2339/2021	EPI_ISL_3347649		2021-07-16	Durango	71	Female		GK	AY.26
	hCoV-19/Mexico/DUR_IBT_IMSS_2347/2021	EPI_ISL_3347654		2021-07-15	Durango	28	Female		GK	AY.20
	hCoV-19/Mexico/DUR_IBT_IMSS_2360/2021	EPI_ISL_3347665		2021-07-19	Durango	61	Female		GK	AY.100
	hCoV-19/Mexico/DUR_IBT_IMSS_2363/2021	EPI_ISL_3347610		2021-07-20	Durango	45	Male		GK	AY.26
	hCoV-19/Mexico/DUR_IBT_IMSS_2364/2021	EPI_ISL_3347913		2021-07-20	Durango	28	Male		GK	AY.100
	hCoV-19/Mexico/DUR_IBT_IMSS_2371/2021	EPI_ISL_3347669		2021-07-21	Durango	50	Female		GK	AY.26
	hCoV-19/Mexico/DUR_IBT_IMSS_2784/2021	EPI_ISL_4006234		2021-08-07	Durango	59	Female		GK	AY.26
	hCoV-19/Mexico/DUR_IBT_IMSS_2788/2021	EPI_ISL_4006238		2021-08-08	Durango	43	Male		GK	AY.20
	hCoV-19/Mexico/DUR_IBT_IMSS_2789/2021	EPI_ISL_4006239		2021-08-08	Durango	56	Female		GK	AY.100
	hCoV-19/Mexico/DUR_IBT_IMSS_2790/2021	EPI_ISL_4006240		2021-08-08	Durango	72	Male		GK	AY.113
	hCoV-19/Mexico/DUR_IBT_IMSS_2791/2021	EPI_ISL_4006241		2021-08-07	Durango	37	Male		GK	AY.26
	hCoV-19/Mexico/DUR_IBT_IMSS_2792/2021	EPI_ISL_4006242		2021-08-06	Durango	54	Male		GK	AY.26
	hCoV-19/Mexico/DUR_IBT_IMSS_2793/2021	EPI_ISL_4006243		2021-08-08	Durango	48	Male		GK	AY.100
	hCoV-19/Mexico/DUR_IBT_IMSS_2794/2021	EPI_ISL_4006244		2021-08-07	Durango	30	Female		GK	AY.100
	hCoV-19/Mexico/DUR_IBT_IMSS_2807/2021	EPI_ISL_4006257		2021-08-08	Durango	39	Male		GK	AY.26
	hCoV-19/Mexico/DUR_IBT_IMSS_2811/2021	EPI_ISL_4006261		2021-08-10	Durango	51	Female		GK	AY.26
	hCoV-19/Mexico/DUR_IBT_IMSS_2812/2021	EPI_ISL_4006262		2021-08-10	Durango	30	Female		GK	AY.100
	hCoV-19/Mexico/DUR_IBT_IMSS_2824/2021	EPI_ISL_4006274		2021-08-12	Durango	60	Male		GK	AY.20
	hCoV-19/Mexico/DUR_IBT_IMSS_2825/2021	EPI_ISL_4006275		2021-08-12	Durango	24	Female		GK	AY.100
	hCoV-19/Mexico/DUR_IBT_IMSS_2844/2021	EPI_ISL_4006295		2021-08-13	Durango	43	Female		GK	AY.100
	hCoV-19/Mexico/DUR_IBT_IMSS_2845/2021	EPI_ISL_4006296		2021-08-13	Durango	80	Male		GK	AY.26
	hCoV-19/Mexico/DUR_IBT_IMSS_2846/2021	EPI_ISL_4006297		2021-08-15	Durango	27	Female		GK	AY.20
	hCoV-19/Mexico/DUR_IBT_IMSS_2847/2021	EPI_ISL_4006298		2021-08-13	Durango	22	Male		GK	B.1.617.2
	hCoV-19/Mexico/DUR_IBT_IMSS_2848/2021	EPI_ISL_4006299		2021-08-15	Durango	18	Female		GK	AY.100
	hCoV-19/Mexico/DUR_IBT_IMSS_2849/2021	EPI_ISL_4006300		2021-08-13	Durango	35	Female		GK	AY.100
	hCoV-19/Mexico/DUR_IBT_IMSS_2850/2021	EPI_ISL_4006301		2021-08-17	Durango	22	Female		GK	AY.100
	hCoV-19/Mexico/DUR_IBT_IMSS_3295/2021	EPI_ISL_4879056		2021-09-05	Durango	32	Female		GK	AY.100
	hCoV-19/Mexico/DUR_IBT_IMSS_3296/2021	EPI_ISL_4878571		2021-09-06	Durango	22	Male		GK	AY.100
	hCoV-19/Mexico/DUR_IBT_IMSS_3352/2021	EPI_ISL_4878627		2021-09-14	Durango	93	Female		GK	AY.100
	hCoV-19/Mexico/DUR_IBT_IMSS_3353/2021	EPI_ISL_4878629		2021-09-14	Durango	42	Male		GK	AY.26
	hCoV-19/Mexico/DUR_IBT_IMSS_3370/2021	EPI_ISL_4878644		2021-09-15	Durango	69	Male		GK	AY.113
	hCoV-19/Mexico/DUR_IBT_IMSS_3770/2021	EPI_ISL_5936943		2021-10-05	Durango	64	Male		GK	AY.113
	hCoV-19/Mexico/DUR_IBT_IMSS_3776/2021	EPI_ISL_5936607		2021-10-06	Durango	64	Male		GK	AY.20
	hCoV-19/Mexico/DUR_IBT_IMSS_3777/2021	EPI_ISL_5936944		2021-10-07	Durango	27	Male		GK	AY.20
	hCoV-19/Mexico/DUR_IBT_IMSS_3790/2021	EPI_ISL_5936634		2021-10-11	Durango	35	Female		GK	AY.100
	hCoV-19/Mexico/DUR_IBT_IMSS_3799/2021	EPI_ISL_5936945		2021-10-12	Durango	43	Female		GK	AY.100
	hCoV-19/Mexico/DUR_IBT_IMSS_3815/2021	EPI_ISL_5936946		2021-10-14	Durango	70	Female		GK	AY.100
	hCoV-19/Mexico/DUR_IBT_IMSS_4233/2021	EPI_ISL_6863395		2021-11-03	Durango	70	Female		GK	AY.100
	hCoV-19/Mexico/DUR_IBT_IMSS_4234/2021	EPI_ISL_6863397		2021-11-03	Durango	76	Male		GK	AY.100
	hCoV-19/Mexico/DUR_IBT_IMSS_4235/2021	EPI_ISL_6863398		2021-11-04	Durango	53	Female		GK	AY.113
	hCoV-19/Mexico/DUR_IBT_IMSS_4236/2021	EPI_ISL_6863399		2021-11-05	Durango	44	Female		GK	AY.113
	hCoV-19/Mexico/DUR_IBT_IMSS_4237/2021	EPI_ISL_6863400		2021-11-04	Durango	67	Female		GK	AY.20
	hCoV-19/Mexico/DUR_IBT_IMSS_4254/2021	EPI_ISL_6863417		2021-11-09	Durango	78	Male		GK	AY.100
	hCoV-19/Mexico/DUR_IBT_IMSS_4255/2021	EPI_ISL_6863418		2021-11-09	Durango	46	Male		GK	AY.100
	hCoV-19/Mexico/DUR_INER_IMSS_1658/2021	EPI_ISL_3556929		2021-07-26	Durango	74	Male		GK	AY.26
	hCoV-19/Mexico/DUR_INER_IMSS_1667/2021	EPI_ISL_3556938		2021-07-29	Durango	25	Male		GK	AY.20
	hCoV-19/Mexico/DUR_INER_IMSS_1668/2021	EPI_ISL_3556939		2021-07-28	Durango	19	Male		GK	AY.26
	hCoV-19/Mexico/DUR_INER_IMSS_1669/2021	EPI_ISL_3556940		2021-07-28	Durango	53	Male		GK	AY.113
	hCoV-19/Mexico/DUR_INER_IMSS_1670/2021	EPI_ISL_3556941		2021-07-28	Durango	22	Male		GK	AY.48
	hCoV-19/Mexico/DUR_INER_IMSS_1671/2021	EPI_ISL_3556942		2021-07-29	Durango	27	Female		GK	AY.20
	hCoV-19/Mexico/DUR_INER_IMSS_1672/2021	EPI_ISL_3556943		2021-07-29	Durango	61	Female		GK	B.1.617.2
	hCoV-19/Mexico/DUR_INER_IMSS_1689/2021	EPI_ISL_3556960		2021-07-28	Durango	33	Male		GK	AY.26
	hCoV-19/Mexico/DUR_INER_IMSS_1690/2021	EPI_ISL_3556961		2021-07-28	Durango	73	Female		GK	AY.113
	hCoV-19/Mexico/DUR_INER_IMSS_2088/2021	EPI_ISL_4299511		2021-08-22	Durango	77	Female		GK	AY.26
	hCoV-19/Mexico/DUR_INER_IMSS_2362/2021	EPI_ISL_5194223		2021-09-18	Durango	79	Male		GK	B.1.617.2
	hCoV-19/Mexico/DUR_INER_IMSS_2363/2021	EPI_ISL_5194224		2021-09-20	Durango	53	Female		GK	AY.26
	hCoV-19/Mexico/DUR_INER_IMSS_2400/2021	EPI_ISL_5193899		2021-09-21	Durango	9	Female		GK	AY.20
	hCoV-19/Mexico/DUR_LANGEBIO_IMSS_1879/2021	EPI_ISL_3805767		2021-07-29	Durango	43	Female		GK	AY.26
	hCoV-19/Mexico/DUR_LANGEBIO_IMSS_1880/2021	EPI_ISL_3805424		2021-07-30	Durango	16	Female		GK	AY.20
	hCoV-19/Mexico/DUR_LANGEBIO_IMSS_1892/2021	EPI_ISL_3805456		2021-07-31	Durango	40	Female		GK	AY.100
	hCoV-19/Mexico/DUR_LANGEBIO_IMSS_1893/2021	EPI_ISL_3805441		2021-07-30	Durango	31	Female		GK	AY.26
	hCoV-19/Mexico/DUR_LANGEBIO_IMSS_1894/2021	EPI_ISL_3805421		2021-07-30	Durango	0	Female		GK	AY.20
	hCoV-19/Mexico/DUR_LANGEBIO_IMSS_1896/2021	EPI_ISL_3805454		2021-08-02	Durango	39	Female		GK	AY.26
	hCoV-19/Mexico/DUR_LANGEBIO_IMSS_1913/2021	EPI_ISL_3805470		2021-08-02	Durango	49	Male		GK	AY.26
	hCoV-19/Mexico/DUR_LANGEBIO_IMSS_1920/2021	EPI_ISL_3805471		2021-08-02	Durango	50	Female		GK	AY.26
	hCoV-19/Mexico/DUR_LANGEBIO_IMSS_1923/2021	EPI_ISL_3805764		2021-08-03	Durango	29	Male		GV	AY.26
	hCoV-19/Mexico/DUR_LANGEBIO_IMSS_1924/2021	EPI_ISL_3805765		2021-08-04	Durango	23	Male		GK	AY.100
	hCoV-19/Mexico/DUR_LANGEBIO_IMSS_1938/2021	EPI_ISL_3805484		2021-08-05	Durango	88	Male		GK	AY.25
	hCoV-19/Mexico/DUR_LANGEBIO_IMSS_1939/2021	EPI_ISL_3805479		2021-08-05	Durango	66	Female		GK	AY.113
	hCoV-19/Mexico/DUR_LANGEBIO_IMSS_1940/2021	EPI_ISL_3805428		2021-08-05	Durango	22	Female		GK	AY.26
	hCoV-19/Mexico/DUR_LANGEBIO_IMSS_1941/2021	EPI_ISL_3805423		2021-08-06	Durango	13	Female		GK	AY.26
	hCoV-19/Mexico/DUR_LANGEBIO_IMSS_1945/2021	EPI_ISL_3805432		2021-08-04	Durango	25	Male		GK	AY.3
	hCoV-19/Mexico/DUR_LANGEBIO_IMSS_1946/2021	EPI_ISL_3805435		2021-08-04	Durango	27	Male		GK	AY.3
	hCoV-19/Mexico/DUR_LANGEBIO_IMSS_1947/2021	EPI_ISL_3805436		2021-08-06	Durango	27	Female		GK	AY.20
	hCoV-19/Mexico/DUR_LANGEBIO_IMSS_1948/2021	EPI_ISL_3805457		2021-08-06	Durango	40	Male		GK	AY.100
	hCoV-19/Mexico/DUR_LANGEBIO_IMSS_2240/2021	EPI_ISL_4549960		2021-08-30	Durango	85	Male		GK	AY.100
	hCoV-19/Mexico/DUR_LANGEBIO_IMSS_2241/2021	EPI_ISL_4549961		2021-08-31	Durango	29	Female		GK	AY.26
	hCoV-19/Mexico/DUR_LANGEBIO_IMSS_2242/2021	EPI_ISL_4549962		2021-08-31	Durango	42	Female		GK	AY.26
	hCoV-19/Mexico/DUR_LANGEBIO_IMSS_2261/2021	EPI_ISL_4549963		2021-08-31	Durango	50	Female		GK	AY.3
	hCoV-19/Mexico/DUR_LANGEBIO_IMSS_2652/2021	EPI_ISL_5850671		2021-09-27	Durango	37	Female		GK	AY.20
	hCoV-19/Mexico/DUR_LANGEBIO_IMSS_2653/2021	EPI_ISL_5850672		2021-09-27	Durango	39	Male		GK	AY.20
	hCoV-19/Mexico/DUR_LANGEBIO_IMSS_2654/2021	EPI_ISL_5850673		2021-09-24	Durango	43	Male		GK	AY.100
	hCoV-19/Mexico/DUR_LANGEBIO_IMSS_2674/2021	EPI_ISL_5850693		2021-09-24	Durango	73	Female		GK	AY.20
	hCoV-19/Mexico/DUR_LANGEBIO_IMSS_2675/2021	EPI_ISL_5850694		2021-09-27	Durango	38	Female		GK	AY.3
	hCoV-19/Mexico/DUR_LANGEBIO_IMSS_2689/2021	EPI_ISL_5850708		2021-09-27	Durango	32	Female		GK	AY.3
	hCoV-19/Mexico/DUR_LANGEBIO_IMSS_2720/2021	EPI_ISL_5850739		2021-09-29	Durango	80	Female		GK	AY.26
	hCoV-19/Mexico/DUR_LANGEBIO_IMSS_2746/2021	EPI_ISL_5850765		2021-09-30	Durango	64	Female		GK	AY.20
	hCoV-19/Mexico/DUR_LANGEBIO_IMSS_3152/2021	EPI_ISL_6775701		2021-10-25	Durango	66	Male		GK	B.1.617.2
	hCoV-19/Mexico/DUR_LANGEBIO_IMSS_3153/2021	EPI_ISL_6775702		2021-10-21	Durango	67	Male		GK	B.1.617.2
	hCoV-19/Mexico/DUR_LANGEBIO_IMSS_3154/2021	EPI_ISL_6775703		2021-10-25	Durango	65	Female		GK	AY.26
	hCoV-19/Mexico/DUR_LANGEBIO_IMSS_3155/2021	EPI_ISL_6775704		2021-10-24	Durango	84	Female		GK	AY.100
	hCoV-19/Mexico/DUR_LANGEBIO_IMSS_3156/2021	EPI_ISL_6775705		2021-10-25	Durango	76	Female		G	AY.100
	hCoV-19/Mexico/DUR_LANGEBIO_IMSS_3157/2021	EPI_ISL_6775706		2021-10-21	Durango	34	Male		GK	B.1.617.2
	hCoV-19/Mexico/DUR_LANGEBIO_IMSS_3158/2021	EPI_ISL_6775707		2021-10-21	Durango	14	Male		GK	B.1.617.2
	hCoV-19/Mexico/DUR_LANGEBIO_IMSS_3187/2021	EPI_ISL_6775708		2021-10-29	Durango	31	Female		GK	AY.100
	hCoV-19/Mexico/DUR-INER_IMSS_1418/2021	EPI_ISL_3155428		2021-07-06	Durango	22	Male		GK	AY.26
	hCoV-19/Mexico/DUR-LANGEBIO_IMSS_1383/2021	EPI_ISL_2942511		2021-06-24	Durango	34	Male		G	AY.20
	hCoV-19/Mexico/DUR-LANGEBIO_IMSS_1684/2021	EPI_ISL_2942775		2021-06-30	Durango	21	Male		G	AY.100
	hCoV-19/Mexico/GRO_IBT_IMSS_2429/2021	EPI_ISL_3347726		2021-07-17	Guerrero	48	Male		GK	AY.20
	hCoV-19/Mexico/GRO_IBT_IMSS_2430/2021	EPI_ISL_3347727		2021-07-17	Guerrero	84	Male		GK	AY.26
	hCoV-19/Mexico/GRO_IBT_IMSS_2467/2021	EPI_ISL_3347755		2021-07-21	Guerrero	66	Male		GK	AY.20
	hCoV-19/Mexico/GRO_IBT_IMSS_2527/2021	EPI_ISL_3347795		2021-07-23	Guerrero	35	Female		GK	AY.20
	hCoV-19/Mexico/GRO_IBT_IMSS_2528/2021	EPI_ISL_3347796		2021-07-23	Guerrero	80	Female		GK	AY.20
	hCoV-19/Mexico/GRO_IBT_IMSS_2534/2021	EPI_ISL_3347800		2021-07-21	Guerrero	41	Male		GK	AY.20
	hCoV-19/Mexico/GRO_IBT_IMSS_2549/2021	EPI_ISL_3347807		2021-07-23	Guerrero	66	Male		GK	AY.20
	hCoV-19/Mexico/GRO_IBT_IMSS_2550/2021	EPI_ISL_3347808		2021-07-22	Guerrero	72	Female		GK	AY.20
	hCoV-19/Mexico/GRO_IBT_IMSS_2905/2021	EPI_ISL_4006424		2021-08-12	Guerrero	23	Male		GK	AY.20
	hCoV-19/Mexico/GRO_IBT_IMSS_2906/2021	EPI_ISL_4006425		2021-08-12	Guerrero	48	Female		GK	AY.113
	hCoV-19/Mexico/GRO_IBT_IMSS_2907/2021	EPI_ISL_4006426		2021-08-12	Guerrero	30	Male		GK	AY.20
	hCoV-19/Mexico/GRO_IBT_IMSS_2908/2021	EPI_ISL_4006427		2021-08-13	Guerrero	40	Male		GK	AY.20
	hCoV-19/Mexico/GRO_IBT_IMSS_2909/2021	EPI_ISL_4006428		2021-08-15	Guerrero	77	Female		GK	AY.26
	hCoV-19/Mexico/GRO_IBT_IMSS_2910/2021	EPI_ISL_4006429		2021-08-16	Guerrero	80	Female		GK	AY.113
	hCoV-19/Mexico/GRO_IBT_IMSS_2924/2021	EPI_ISL_4006443		2021-08-16	Guerrero	59	Male		GK	AY.26
	hCoV-19/Mexico/GRO_IBT_IMSS_2925/2021	EPI_ISL_4006444		2021-08-16	Guerrero	50	Female		GK	AY.20
	hCoV-19/Mexico/GRO_IBT_IMSS_2926/2021	EPI_ISL_4006445		2021-08-16	Guerrero	77	Female		GK	AY.26
	hCoV-19/Mexico/GRO_IBT_IMSS_2927/2021	EPI_ISL_4006446		2021-08-16	Guerrero	87	Male		GK	AY.26
	hCoV-19/Mexico/GRO_IBT_IMSS_3393/2021	EPI_ISL_4878722		2021-09-07	Guerrero	64	Male		GK	AY.26
	hCoV-19/Mexico/GRO_IBT_IMSS_3834/2021	EPI_ISL_5937088		2021-10-05	Guerrero	85	Male		GK	B.1.617.2
	hCoV-19/Mexico/GRO_IBT_IMSS_4278/2021	EPI_ISL_6863488		2021-11-02	Guerrero	43	Male		GK	AY.113
	hCoV-19/Mexico/GRO_IBT_IMSS_4279/2021	EPI_ISL_6863489		2021-11-02	Guerrero	58	Female		GK	AY.20
	hCoV-19/Mexico/GRO_IBT_IMSS_4347/2021	EPI_ISL_6863559		2021-11-05	Guerrero	16	Female		GK	AY.20
	hCoV-19/Mexico/GRO_INER_IMSS_1887/2021	EPI_ISL_3557158		2021-07-30	Guerrero	70	Male		GK	AY.20
	hCoV-19/Mexico/GRO_INER_IMSS_1888/2021	EPI_ISL_3557159		2021-07-30	Guerrero	46	Male		GK	AY.20
	hCoV-19/Mexico/GRO_INER_IMSS_2178/2021	EPI_ISL_4299601		2021-08-19	Guerrero	33	Male		GK	AY.20
	hCoV-19/Mexico/GRO_INER_IMSS_2497/2021	EPI_ISL_5194195		2021-09-17	Guerrero	80	Female		GK	AY.20
	hCoV-19/Mexico/GRO_INER_IMSS_2498/2021	EPI_ISL_5194196		2021-09-17	Guerrero	39	Male		GK	AY.20
	hCoV-19/Mexico/GRO_INER_IMSS_2499/2021	EPI_ISL_5194197		2021-09-17	Guerrero	73	Male		GK	AY.20
	hCoV-19/Mexico/GRO_INER_IMSS_2506/2021	EPI_ISL_5194198		2021-09-20	Guerrero	71	Female		GK	AY.26
	hCoV-19/Mexico/GRO_LANGEBIO_IMSS_2034/2021	EPI_ISL_3805620		2021-08-02	Guerrero	69	Female		GK	AY.20
	hCoV-19/Mexico/GRO_LANGEBIO_IMSS_2035/2021	EPI_ISL_3805582		2021-08-02	Guerrero	48	Male		GK	AY.20
	hCoV-19/Mexico/GRO_LANGEBIO_IMSS_2415/2021	EPI_ISL_4549964		2021-08-30	Guerrero	64	Female		GK	AY.20
	hCoV-19/Mexico/GRO_LANGEBIO_IMSS_2416/2021	EPI_ISL_4549965		2021-08-30	Guerrero	26	Female		GK	AY.20
	hCoV-19/Mexico/GRO-INER_IMSS_1617/2021	EPI_ISL_3155627		2021-07-07	Guerrero	32	Male		GK	AY.20
	hCoV-19/Mexico/GRO-INER_IMSS_1618/2021	EPI_ISL_3155628		2021-07-07	Guerrero	26	Female		GK	AY.26
	hCoV-19/Mexico/GRO-INER_IMSS_1619/2021	EPI_ISL_3155629		2021-07-07	Guerrero	54	Female		GK	AY.26
	hCoV-19/Mexico/GRO-INER_IMSS_1621/2021	EPI_ISL_3155631		2021-07-08	Guerrero	23	Male		GK	AY.20
	hCoV-19/Mexico/GRO-INER_IMSS_1622/2021	EPI_ISL_3155632		2021-07-08	Guerrero	38	Female		GK	AY.20
	hCoV-19/Mexico/GRO-INER_IMSS_1642/2021	EPI_ISL_3155652		2021-07-09	Guerrero	66	Female		GK	AY.20
	hCoV-19/Mexico/GRO-LANGEBIO_IMSS_1089/2021	EPI_ISL_2671563		2021-05-16	Guerrero	46	Male		GK	AY.26
	hCoV-19/Mexico/GRO-LANGEBIO_IMSS_1773/2021	EPI_ISL_2942850		2021-06-28	Guerrero	30	Female		G	AY.20
	hCoV-19/Mexico/GRO-LANGEBIO_IMSS_1801/2021	EPI_ISL_2942876		2021-06-30	Guerrero	46	Male		G	AY.20
	hCoV-19/Mexico/GRO-LANGEBIO_IMSS_1838/2021	EPI_ISL_2942906		2021-06-30	Guerrero	16	Female		G	AY.20
	hCoV-19/Mexico/GRO-LANGEBIO_IMSS_1839/2021	EPI_ISL_2942907		2021-06-30	Guerrero	22	Female		G	AY.20
	hCoV-19/Mexico/GRO-LANGEBIO_IMSS_1870/2021	EPI_ISL_2942931		2021-06-30	Guerrero	36	Male		G	AY.20
	hCoV-19/Mexico/GRO-LANGEBIO_IMSS_1871/2021	EPI_ISL_2942932		2021-07-01	Guerrero	49	Female		G	AY.26
	hCoV-19/Mexico/GUA_IBT_IMSS_1074940/NC/2021	EPI_ISL_6863756		2021-11-04	Guanajuato	27	Female		GK	AY.26
	hCoV-19/Mexico/GUA_IBT_IMSS_2131/2021	EPI_ISL_3347910		2021-07-24	Guanajuato	28	Male		GK	AY.20
	hCoV-19/Mexico/GUA_IBT_IMSS_2182/2021	EPI_ISL_3347809		2021-07-12	Guanajuato	70	Male		GK	AY.20
	hCoV-19/Mexico/GUA_IBT_IMSS_2187/2021	EPI_ISL_3347520		2021-07-10	Guanajuato	22	Male		GK	AY.25
	hCoV-19/Mexico/GUA_IBT_IMSS_2188/2021	EPI_ISL_3347812		2021-07-10	Guanajuato	22	Male		GK	AY.20
	hCoV-19/Mexico/GUA_IBT_IMSS_2200/2021	EPI_ISL_3347824		2021-07-14	Guanajuato	26	Male		GK	AY.20
	hCoV-19/Mexico/GUA_IBT_IMSS_2209/2021	EPI_ISL_3347829		2021-07-07	Guanajuato	35	Female		GK	AY.26
	hCoV-19/Mexico/GUA_IBT_IMSS_2231/2021	EPI_ISL_3347847		2021-07-19	Guanajuato	23	Female		GK	AY.20
	hCoV-19/Mexico/GUA_IBT_IMSS_2233/2021	EPI_ISL_3347849		2021-07-18	Guanajuato	48	Female		GK	AY.20
	hCoV-19/Mexico/GUA_IBT_IMSS_2234/2021	EPI_ISL_3347850		2021-07-18	Guanajuato	36	Male		GK	AY.20
	hCoV-19/Mexico/GUA_IBT_IMSS_2235/2021	EPI_ISL_3347851		2021-07-18	Guanajuato	37	Male		GK	AY.26
	hCoV-19/Mexico/GUA_IBT_IMSS_2236/2021	EPI_ISL_3347852		2021-07-18	Guanajuato	47	Female		GK	AY.3
	hCoV-19/Mexico/GUA_IBT_IMSS_2243/2021	EPI_ISL_3347858		2021-07-19	Guanajuato	54	Male		GK	AY.20
	hCoV-19/Mexico/GUA_IBT_IMSS_2245/2021	EPI_ISL_3347859		2021-07-18	Guanajuato	24	Female		GK	AY.20
	hCoV-19/Mexico/GUA_IBT_IMSS_2246/2021	EPI_ISL_3347860		2021-07-19	Guanajuato	29	Male		GK	AY.26
	hCoV-19/Mexico/GUA_IBT_IMSS_2247/2021	EPI_ISL_3347861		2021-07-19	Guanajuato	30	Female		GK	AY.26
	hCoV-19/Mexico/GUA_IBT_IMSS_2251/2021	EPI_ISL_3347865		2021-07-20	Guanajuato	72	Male		GK	AY.20
	hCoV-19/Mexico/GUA_IBT_IMSS_2252/2021	EPI_ISL_3347866		2021-07-19	Guanajuato	33	Female		GK	AY.26
	hCoV-19/Mexico/GUA_IBT_IMSS_2262/2021	EPI_ISL_3347873		2021-07-17	Guanajuato	26	Male		GK	AY.20
	hCoV-19/Mexico/GUA_IBT_IMSS_2263/2021	EPI_ISL_3347874		2021-07-20	Guanajuato	64	Female		GK	AY.20
	hCoV-19/Mexico/GUA_IBT_IMSS_2264/2021	EPI_ISL_3347875		2021-07-20	Guanajuato	63	Male		GK	AY.26
	hCoV-19/Mexico/GUA_IBT_IMSS_2265/2021	EPI_ISL_3347876		2021-07-20	Guanajuato	47	Male		GK	AY.20
	hCoV-19/Mexico/GUA_IBT_IMSS_2266/2021	EPI_ISL_3347877		2021-07-20	Guanajuato	72	Female		GK	AY.26
	hCoV-19/Mexico/GUA_IBT_IMSS_2278/2021	EPI_ISL_3347884		2021-07-21	Guanajuato	29	Male		GK	AY.20
	hCoV-19/Mexico/GUA_IBT_IMSS_2279/2021	EPI_ISL_3347885		2021-07-21	Guanajuato	65	Male		GK	AY.20
	hCoV-19/Mexico/GUA_IBT_IMSS_2284/2021	EPI_ISL_3347890		2021-07-23	Guanajuato	29	Female		GK	AY.26
	hCoV-19/Mexico/GUA_IBT_IMSS_2285/2021	EPI_ISL_3347891		2021-07-22	Guanajuato	31	Female		GK	AY.3
	hCoV-19/Mexico/GUA_IBT_IMSS_2667/2021	EPI_ISL_4006566		2021-08-10	Guanajuato	58	Female		GK	AY.20
	hCoV-19/Mexico/GUA_IBT_IMSS_2668/2021	EPI_ISL_4006567		2021-08-10	Guanajuato	76	Male		GK	AY.20
	hCoV-19/Mexico/GUA_IBT_IMSS_2675/2021	EPI_ISL_4006574		2021-08-09	Guanajuato	29	Female		GK	AY.20
	hCoV-19/Mexico/GUA_IBT_IMSS_2676/2021	EPI_ISL_4006575		2021-08-09	Guanajuato	43	Male		GK	AY.20
	hCoV-19/Mexico/GUA_IBT_IMSS_2688/2021	EPI_ISL_4006587		2021-08-12	Guanajuato	60	Female		GK	AY.20
	hCoV-19/Mexico/GUA_IBT_IMSS_2689/2021	EPI_ISL_4006588		2021-08-11	Guanajuato	32	Female		GK	AY.20
	hCoV-19/Mexico/GUA_IBT_IMSS_2690/2021	EPI_ISL_4006589		2021-08-12	Guanajuato	61	Female		GK	AY.20
	hCoV-19/Mexico/GUA_IBT_IMSS_2691/2021	EPI_ISL_4006590		2021-08-11	Guanajuato	36	Male		GK	AY.20
	hCoV-19/Mexico/GUA_IBT_IMSS_2692/2021	EPI_ISL_4006591		2021-08-12	Guanajuato	30	Female		GK	AY.20
	hCoV-19/Mexico/GUA_IBT_IMSS_2694/2021	EPI_ISL_4006593		2021-08-13	Guanajuato	38	Female		GK	AY.20
	hCoV-19/Mexico/GUA_IBT_IMSS_2695/2021	EPI_ISL_4006594		2021-08-13	Guanajuato	39	Female		GK	AY.20
	hCoV-19/Mexico/GUA_IBT_IMSS_2696/2021	EPI_ISL_4006595		2021-08-11	Guanajuato	34	Male		GK	AY.3
	hCoV-19/Mexico/GUA_IBT_IMSS_2697/2021	EPI_ISL_4006596		2021-08-12	Guanajuato	39	Male		GK	AY.20
	hCoV-19/Mexico/GUA_IBT_IMSS_2698/2021	EPI_ISL_4006597		2021-08-13	Guanajuato	25	Female		GK	AY.3
	hCoV-19/Mexico/GUA_IBT_IMSS_2703/2021	EPI_ISL_4006602		2021-08-14	Guanajuato	54	Male		GK	AY.26
	hCoV-19/Mexico/GUA_IBT_IMSS_3169/2021	EPI_ISL_4878833		2021-09-03	Guanajuato	69	Male		GK	AY.26
	hCoV-19/Mexico/GUA_IBT_IMSS_3170/2021	EPI_ISL_4878834		2021-09-03	Guanajuato	48	Male		GK	AY.20
	hCoV-19/Mexico/GUA_IBT_IMSS_3171/2021	EPI_ISL_4878835		2021-09-05	Guanajuato	47	Female		GK	AY.20
	hCoV-19/Mexico/GUA_IBT_IMSS_3172/2021	EPI_ISL_4878836		2021-09-05	Guanajuato	74	Male		GK	AY.20
	hCoV-19/Mexico/GUA_IBT_IMSS_3173/2021	EPI_ISL_4878837		2021-09-05	Guanajuato	62	Male		GK	AY.3
	hCoV-19/Mexico/GUA_IBT_IMSS_3174/2021	EPI_ISL_4878838		2021-09-05	Guanajuato	37	Female		GK	AY.3
	hCoV-19/Mexico/GUA_IBT_IMSS_3175/2021	EPI_ISL_4878839		2021-09-05	Guanajuato	63	Male		GK	AY.26
	hCoV-19/Mexico/GUA_IBT_IMSS_3176/2021	EPI_ISL_4878840		2021-09-03	Guanajuato	51	Male		GK	AY.113
	hCoV-19/Mexico/GUA_IBT_IMSS_3177/2021	EPI_ISL_4878841		2021-09-02	Guanajuato	49	Female		GK	AY.13
	hCoV-19/Mexico/GUA_IBT_IMSS_3178/2021	EPI_ISL_4878842		2021-09-02	Guanajuato	31	Female		GK	AY.75
	hCoV-19/Mexico/GUA_IBT_IMSS_3179/2021	EPI_ISL_4878843		2021-09-03	Guanajuato	20	Female		GK	AY.3
	hCoV-19/Mexico/GUA_IBT_IMSS_3180/2021	EPI_ISL_4878844		2021-09-05	Guanajuato	31	Female		GK	AY.3
	hCoV-19/Mexico/GUA_IBT_IMSS_3181/2021	EPI_ISL_4878845		2021-09-03	Guanajuato	27	Male		GK	AY.20
	hCoV-19/Mexico/GUA_IBT_IMSS_3190/2021	EPI_ISL_4878852		2021-09-03	Guanajuato	34	Female		GK	AY.20
	hCoV-19/Mexico/GUA_IBT_IMSS_3191/2021	EPI_ISL_4878853		2021-09-05	Guanajuato	44	Female		GK	AY.113
	hCoV-19/Mexico/GUA_IBT_IMSS_3192/2021	EPI_ISL_4878854		2021-09-05	Guanajuato	27	Female		GK	AY.100
	hCoV-19/Mexico/GUA_IBT_IMSS_3193/2021	EPI_ISL_4878855		2021-09-05	Guanajuato	73	Female		GK	AY.20
	hCoV-19/Mexico/GUA_IBT_IMSS_3194/2021	EPI_ISL_4878856		2021-09-05	Guanajuato	72	Male		GK	AY.26
	hCoV-19/Mexico/GUA_IBT_IMSS_3195/2021	EPI_ISL_4879049		2021-09-05	Guanajuato	74	Male		GK	AY.20
	hCoV-19/Mexico/GUA_IBT_IMSS_3196/2021	EPI_ISL_4878857		2021-09-05	Guanajuato	42	Female		GK	AY.26
	hCoV-19/Mexico/GUA_IBT_IMSS_3200/2021	EPI_ISL_4878860		2021-09-07	Guanajuato	62	Female		GK	AY.26
	hCoV-19/Mexico/GUA_IBT_IMSS_3201/2021	EPI_ISL_4878861		2021-09-06	Guanajuato	46	Male		GK	AY.43
	hCoV-19/Mexico/GUA_IBT_IMSS_3202/2021	EPI_ISL_4878862		2021-09-06	Guanajuato	0	Male		GK	AY.20
	hCoV-19/Mexico/GUA_IBT_IMSS_3203/2021	EPI_ISL_4878863		2021-09-05	Guanajuato	65	Female		GK	AY.113
	hCoV-19/Mexico/GUA_IBT_IMSS_3204/2021	EPI_ISL_4878864		2021-09-03	Guanajuato	60	Male		GK	AY.20
	hCoV-19/Mexico/GUA_IBT_IMSS_3679/2021	EPI_ISL_5936663		2021-10-05	Guanajuato	30	Male		GK	AY.26
	hCoV-19/Mexico/GUA_IBT_IMSS_3680/2021	EPI_ISL_5936928		2021-10-05	Guanajuato	20	Female		GK	AY.26
	hCoV-19/Mexico/GUA_IBT_IMSS_3701/2021	EPI_ISL_5936600		2021-10-06	Guanajuato	59	Male		GK	AY.100
	hCoV-19/Mexico/GUA_IBT_IMSS_3702/2021	EPI_ISL_5936929		2021-10-07	Guanajuato	34	Female		GK	AY.20
	hCoV-19/Mexico/GUA_IBT_IMSS_3711/2021	EPI_ISL_5936930		2021-10-03	Guanajuato	37	Female		GK	AY.3
	hCoV-19/Mexico/GUA_IBT_IMSS_3712/2021	EPI_ISL_5936577		2021-10-06	Guanajuato	79	Male		GK	AY.113
	hCoV-19/Mexico/GUA_IBT_IMSS_3713/2021	EPI_ISL_5936586		2021-10-06	Guanajuato	26	Female		GK	AY.20
	hCoV-19/Mexico/GUA_IBT_IMSS_3714/2021	EPI_ISL_5936931		2021-10-05	Guanajuato	21	Female		GK	AY.20
	hCoV-19/Mexico/GUA_IBT_IMSS_3715/2021	EPI_ISL_5936621		2021-10-05	Guanajuato	15	Male		GK	AY.3
	hCoV-19/Mexico/GUA_IBT_IMSS_3716/2021	EPI_ISL_5936932		2021-10-07	Guanajuato	42	Female		GK	AY.26
	hCoV-19/Mexico/GUA_IBT_IMSS_3717/2021	EPI_ISL_5936933		2021-10-07	Guanajuato	23	Female		GK	AY.113
	hCoV-19/Mexico/GUA_IBT_IMSS_3718/2021	EPI_ISL_5936934		2021-10-06	Guanajuato	79	Male		GK	AY.20
	hCoV-19/Mexico/GUA_IBT_IMSS_3719/2021	EPI_ISL_5936591		2021-10-06	Guanajuato	47	Female		GK	AY.3
	hCoV-19/Mexico/GUA_IBT_IMSS_3720/2021	EPI_ISL_5936935		2021-10-06	Guanajuato	28	Male		GK	AY.3
	hCoV-19/Mexico/GUA_IBT_IMSS_3721/2021	EPI_ISL_5936605		2021-10-05	Guanajuato	29	Male		GK	AY.20
	hCoV-19/Mexico/GUA_IBT_IMSS_3722/2021	EPI_ISL_5936936		2021-10-05	Guanajuato	46	Female		GK	AY.3
	hCoV-19/Mexico/GUA_IBT_IMSS_3723/2021	EPI_ISL_5936937		2021-10-06	Guanajuato	26	Male		GK	AY.44
	hCoV-19/Mexico/GUA_IBT_IMSS_3726/2021	EPI_ISL_5936938		2021-10-06	Guanajuato	64	Male		GK	AY.3
	hCoV-19/Mexico/GUA_IBT_IMSS_3727/2021	EPI_ISL_5936617		2021-10-06	Guanajuato	71	Male		GK	AY.29.1
	hCoV-19/Mexico/GUA_IBT_IMSS_3728/2021	EPI_ISL_5936939		2021-10-07	Guanajuato	67	Male		GK	AY.100
	hCoV-19/Mexico/GUA_IBT_IMSS_3729/2021	EPI_ISL_5936940		2021-10-08	Guanajuato	29	Female		GK	AY.20
	hCoV-19/Mexico/GUA_IBT_IMSS_3730/2021	EPI_ISL_5936941		2021-10-07	Guanajuato	71	Male		GK	AY.3
	hCoV-19/Mexico/GUA_IBT_IMSS_3756/2021	EPI_ISL_5936599		2021-10-09	Guanajuato	45	Female		GK	AY.113
	hCoV-19/Mexico/GUA_IBT_IMSS_3757/2021	EPI_ISL_5936942		2021-10-09	Guanajuato	66	Female		GK	AY.98
	hCoV-19/Mexico/GUA_IBT_IMSS_4110/2021	EPI_ISL_6863738		2021-11-03	Guanajuato	71	Female		GK	AY.25
	hCoV-19/Mexico/GUA_IBT_IMSS_4111/2021	EPI_ISL_6863739		2021-11-03	Guanajuato	80	Female		GK	AY.3
	hCoV-19/Mexico/GUA_IBT_IMSS_4115/2021	EPI_ISL_6863743		2021-11-03	Guanajuato	50	Male		GK	AY.26
	hCoV-19/Mexico/GUA_IBT_IMSS_4116/2021	EPI_ISL_6863744		2021-11-03	Guanajuato	63	Female		GK	AY.44
	hCoV-19/Mexico/GUA_IBT_IMSS_4117/2021	EPI_ISL_6863745		2021-11-03	Guanajuato	54	Male		GK	AY.26
	hCoV-19/Mexico/GUA_IBT_IMSS_4118/2021	EPI_ISL_6863746		2021-11-03	Guanajuato	72	Female		GK	AY.26
	hCoV-19/Mexico/GUA_IBT_IMSS_4120/2021	EPI_ISL_6863748		2021-11-05	Guanajuato	31	Male		GK	AY.20
	hCoV-19/Mexico/GUA_IBT_IMSS_4121/2021	EPI_ISL_6863749		2021-11-05	Guanajuato	35	Male		GK	AY.26
	hCoV-19/Mexico/GUA_IBT_IMSS_4122/2021	EPI_ISL_6863750		2021-11-04	Guanajuato	76	Female		GK	AY.20
	hCoV-19/Mexico/GUA_IBT_IMSS_4123/2021	EPI_ISL_6863751		2021-11-03	Guanajuato	48	Female		GK	AY.20
	hCoV-19/Mexico/GUA_IBT_IMSS_4124/2021	EPI_ISL_6863752		2021-11-03	Guanajuato	41	Male		GK	AY.44
	hCoV-19/Mexico/GUA_IBT_IMSS_4127/2021	EPI_ISL_6863755		2021-11-04	Guanajuato	70	Female		GK	AY.100
	hCoV-19/Mexico/GUA_IBT_IMSS_4128/2021	EPI_ISL_6863757		2021-11-04	Guanajuato	52	Female		GK	AY.26
	hCoV-19/Mexico/GUA_IBT_IMSS_4129/2021	EPI_ISL_6863758		2021-11-04	Guanajuato	83	Male		GK	AY.20
	hCoV-19/Mexico/GUA_IBT_IMSS_4130/2021	EPI_ISL_6863759		2021-11-05	Guanajuato	54	Female		GK	AY.26
	hCoV-19/Mexico/GUA_IBT_IMSS_4138/2021	EPI_ISL_6863767		2021-11-05	Guanajuato	70	Female		GK	AY.100
	hCoV-19/Mexico/GUA_IBT_IMSS_4149/2021	EPI_ISL_6863779		2021-11-03	Guanajuato	53	Male		GK	AY.20
	hCoV-19/Mexico/GUA_INER_IMSS_1899/2021	EPI_ISL_3557170		2021-07-25	Guanajuato	48	Male		GK	AY.20
	hCoV-19/Mexico/GUA_INER_IMSS_1900/2021	EPI_ISL_3557171		2021-07-25	Guanajuato	47	Female		GK	B.1.617.2
	hCoV-19/Mexico/GUA_INER_IMSS_1901/2021	EPI_ISL_3557172		2021-07-25	Guanajuato	32	Female		GK	B.1.617.2
	hCoV-19/Mexico/GUA_INER_IMSS_1902/2021	EPI_ISL_3557173		2021-07-23	Guanajuato	27	Male		GK	AY.20
	hCoV-19/Mexico/GUA_INER_IMSS_1903/2021	EPI_ISL_3557174		2021-07-23	Guanajuato	38	Female		GK	B.1.617.2
	hCoV-19/Mexico/GUA_INER_IMSS_1904/2021	EPI_ISL_3557175		2021-07-23	Guanajuato	21	Male		GK	B.1.617.2
	hCoV-19/Mexico/GUA_INER_IMSS_1916/2021	EPI_ISL_3557187		2021-07-26	Guanajuato	59	Male		GK	AY.43
	hCoV-19/Mexico/GUA_INER_IMSS_1917/2021	EPI_ISL_3557188		2021-07-27	Guanajuato	54	Male		GK	B.1.617.2
	hCoV-19/Mexico/GUA_INER_IMSS_1918/2021	EPI_ISL_3557189		2021-07-26	Guanajuato	29	Male		GK	AY.3
	hCoV-19/Mexico/GUA_INER_IMSS_1919/2021	EPI_ISL_3557190		2021-07-27	Guanajuato	66	Female		GK	B.1.617.2
	hCoV-19/Mexico/GUA_INER_IMSS_1925/2021	EPI_ISL_3557196		2021-07-23	Guanajuato	45	Male		GK	AY.20
	hCoV-19/Mexico/GUA_INER_IMSS_1926/2021	EPI_ISL_3557197		2021-07-24	Guanajuato	28	Male		GK	AY.26
	hCoV-19/Mexico/GUA_INER_IMSS_1927/2021	EPI_ISL_3557198		2021-07-25	Guanajuato	31	Male		GK	AY.20
	hCoV-19/Mexico/GUA_INER_IMSS_1932/2021	EPI_ISL_3557203		2021-07-26	Guanajuato	31	Male		GK	AY.20
	hCoV-19/Mexico/GUA_INER_IMSS_1933/2021	EPI_ISL_3557204		2021-07-26	Guanajuato	33	Male		GK	AY.20
	hCoV-19/Mexico/GUA_INER_IMSS_1934/2021	EPI_ISL_3557205		2021-07-26	Guanajuato	36	Female		GK	AY.20
	hCoV-19/Mexico/GUA_INER_IMSS_1935/2021	EPI_ISL_3557206		2021-07-26	Guanajuato	15	Female		GK	AY.20
	hCoV-19/Mexico/GUA_INER_IMSS_2272/2021	EPI_ISL_4299695		2021-08-24	Guanajuato	39	Male		GK	AY.20
	hCoV-19/Mexico/GUA_INER_IMSS_2281/2021	EPI_ISL_4299704		2021-08-24	Guanajuato	26	Male		GK	AY.20
	hCoV-19/Mexico/GUA_INER_IMSS_2282/2021	EPI_ISL_4299705		2021-08-24	Guanajuato	84	Female		GK	AY.20
	hCoV-19/Mexico/GUA_INER_IMSS_2283/2021	EPI_ISL_4299706		2021-08-24	Guanajuato	47	Male		GK	AY.25
	hCoV-19/Mexico/GUA_INER_IMSS_2284/2021	EPI_ISL_4299707		2021-08-25	Guanajuato	23	Female		GK	AY.20
	hCoV-19/Mexico/GUA_INER_IMSS_2628/2021	EPI_ISL_5194199		2021-09-21	Guanajuato	55	Male		GK	AY.29.1
	hCoV-19/Mexico/GUA_INER_IMSS_2629/2021	EPI_ISL_5194200		2021-09-21	Guanajuato	41	Female		GK	AY.20
	hCoV-19/Mexico/GUA_INER_IMSS_2630/2021	EPI_ISL_5194201		2021-09-21	Guanajuato	76	Male		GK	AY.113
	hCoV-19/Mexico/GUA_INER_IMSS_2631/2021	EPI_ISL_5194202		2021-09-22	Guanajuato	30	Male		GK	AY.3
	hCoV-19/Mexico/GUA_INER_IMSS_2632/2021	EPI_ISL_5193942		2021-09-21	Guanajuato	62	Female		GK	AY.122
	hCoV-19/Mexico/GUA_INER_IMSS_2633/2021	EPI_ISL_5194203		2021-09-21	Guanajuato	49	Male		GK	AY.20
	hCoV-19/Mexico/GUA_INER_IMSS_2634/2021	EPI_ISL_5194204		2021-09-21	Guanajuato	22	Female		GK	AY.3
	hCoV-19/Mexico/GUA_INER_IMSS_2635/2021	EPI_ISL_5194205		2021-09-21	Guanajuato	30	Male		GK	AY.3
	hCoV-19/Mexico/GUA_INER_IMSS_2636/2021	EPI_ISL_5194206		2021-09-22	Guanajuato	33	Male		GK	AY.113
	hCoV-19/Mexico/GUA_INER_IMSS_2637/2021	EPI_ISL_5194207		2021-09-20	Guanajuato	27	Female		GK	AY.20
	hCoV-19/Mexico/GUA_INER_IMSS_2638/2021	EPI_ISL_5194209		2021-09-20	Guanajuato	19	Male		GK	AY.3
	hCoV-19/Mexico/GUA_INER_IMSS_2639/2021	EPI_ISL_5194210		2021-09-20	Guanajuato	29	Female		GK	AY.113
	hCoV-19/Mexico/GUA_INER_IMSS_2640/2021	EPI_ISL_5194211		2021-09-20	Guanajuato	11	Female		GK	AY.113
	hCoV-19/Mexico/GUA_INER_IMSS_2642/2021	EPI_ISL_5194212		2021-09-22	Guanajuato	39	Female		GK	AY.20
	hCoV-19/Mexico/GUA_INER_IMSS_2643/2021	EPI_ISL_5194213		2021-09-22	Guanajuato	13	Female		GK	AY.20
	hCoV-19/Mexico/GUA_INER_IMSS_2644/2021	EPI_ISL_5194214		2021-09-22	Guanajuato	45	Male		GK	AY.20
	hCoV-19/Mexico/GUA_INER_IMSS_2659/2021	EPI_ISL_5193915		2021-09-23	Guanajuato	77	Female		GK	AY.20
	hCoV-19/Mexico/GUA_INER_IMSS_2670/2021	EPI_ISL_5194215		2021-09-23	Guanajuato	27	Male		GK	AY.20
	hCoV-19/Mexico/GUA_INER_IMSS_2671/2021	EPI_ISL_5194216		2021-09-22	Guanajuato	29	Female		GK	AY.3
	hCoV-19/Mexico/GUA_INER_IMSS_2674/2021	EPI_ISL_5194217		2021-09-23	Guanajuato	52	Male		GK	AY.3
	hCoV-19/Mexico/GUA_INER_IMSS_2687/2021	EPI_ISL_5194218		2021-09-23	Guanajuato	80	Male		GK	AY.20
	hCoV-19/Mexico/GUA_INER_IMSS_2690/2021	EPI_ISL_5194219		2021-09-24	Guanajuato	41	Female		GK	AY.20
	hCoV-19/Mexico/GUA_INER_IMSS_2691/2021	EPI_ISL_5194220		2021-09-24	Guanajuato	88	Male		GK	AY.20
	hCoV-19/Mexico/GUA_INER_IMSS_2692/2021	EPI_ISL_5194221		2021-09-24	Guanajuato	39	Male		GK	AY.20
	hCoV-19/Mexico/GUA_INER_IMSS_2693/2021	EPI_ISL_5193898		2021-09-23	Guanajuato	66	Female		GK	AY.20
	hCoV-19/Mexico/GUA_INER_IMSS_2694/2021	EPI_ISL_5194222		2021-09-23	Guanajuato	82	Male		GK	AY.3
	hCoV-19/Mexico/GUA_INER_IMSS_2994/2021	EPI_ISL_6227561		2021-10-15	Guanajuato	78	Female		GK	AY.20
	hCoV-19/Mexico/GUA_INER_IMSS_2995/2021	EPI_ISL_6227403		2021-10-16	Guanajuato	69	Female		GK	AY.20
	hCoV-19/Mexico/GUA_INER_IMSS_3003/2021	EPI_ISL_6227411		2021-10-15	Guanajuato	63	Female		GK	AY.20
	hCoV-19/Mexico/GUA_INER_IMSS_3005/2021	EPI_ISL_6227413		2021-10-18	Guanajuato	51	Female		GK	AY.44
	hCoV-19/Mexico/GUA_INER_IMSS_3006/2021	EPI_ISL_6227414		2021-10-18	Guanajuato	64	Male		GK	AY.20
	hCoV-19/Mexico/GUA_INER_IMSS_3007/2021	EPI_ISL_6227415		2021-10-18	Guanajuato	35	Female		GK	AY.20
	hCoV-19/Mexico/GUA_INER_IMSS_3008/2021	EPI_ISL_6227416		2021-10-18	Guanajuato	56	Female		GK	AY.20
	hCoV-19/Mexico/GUA_INER_IMSS_3009/2021	EPI_ISL_6227417		2021-10-18	Guanajuato	35	Female		GK	AY.20
	hCoV-19/Mexico/GUA_INER_IMSS_3010/2021	EPI_ISL_6227418		2021-10-18	Guanajuato	39	Female		GK	AY.113
	hCoV-19/Mexico/GUA_INER_IMSS_3011/2021	EPI_ISL_6227419		2021-10-18	Guanajuato	34	Male		GK	AY.3
	hCoV-19/Mexico/GUA_INER_IMSS_3012/2021	EPI_ISL_6227420		2021-10-14	Guanajuato	24	Female		GK	AY.3
	hCoV-19/Mexico/GUA_INER_IMSS_3013/2021	EPI_ISL_6227576		2021-10-16	Guanajuato	55	Female		GK	AY.103
	hCoV-19/Mexico/GUA_INER_IMSS_3014/2021	EPI_ISL_6227552		2021-10-17	Guanajuato	59	Male		GK	AY.26
	hCoV-19/Mexico/GUA_INER_IMSS_3015/2021	EPI_ISL_6227421		2021-10-17	Guanajuato	75	Female		GK	AY.113
	hCoV-19/Mexico/GUA_INER_IMSS_3016/2021	EPI_ISL_6227422		2021-10-18	Guanajuato	55	Male		GK	AY.20
	hCoV-19/Mexico/GUA_INER_IMSS_3017/2021	EPI_ISL_6227423		2021-10-18	Guanajuato	83	Male		GK	AY.26
	hCoV-19/Mexico/GUA_INER_IMSS_3018/2021	EPI_ISL_6227424		2021-10-18	Guanajuato	57	Male		GK	AY.3
	hCoV-19/Mexico/GUA_INER_IMSS_3019/2021	EPI_ISL_6227425		2021-10-19	Guanajuato	81	Female		GK	AY.103
	hCoV-19/Mexico/GUA_INER_IMSS_3020/2021	EPI_ISL_6227426		2021-10-15	Guanajuato	64	Male		GK	AY.3
	hCoV-19/Mexico/GUA_INER_IMSS_3021/2021	EPI_ISL_6227427		2021-10-17	Guanajuato	60	Female		GK	B.1.617.2
	hCoV-19/Mexico/GUA_INER_IMSS_3022/2021	EPI_ISL_6227428		2021-10-18	Guanajuato	76	Female		GK	AY.26
	hCoV-19/Mexico/GUA_INER_IMSS_3023/2021	EPI_ISL_6227429		2021-10-19	Guanajuato	52	Female		GK	AY.25
	hCoV-19/Mexico/GUA_INER_IMSS_3044/2021	EPI_ISL_6227449		2021-10-20	Guanajuato	31	Male		GK	AY.103
	hCoV-19/Mexico/GUA_INER_IMSS_3045/2021	EPI_ISL_6227450		2021-10-07	Guanajuato	64	Female		GK	AY.20
	hCoV-19/Mexico/GUA_INER_IMSS_3046/2021	EPI_ISL_6227451		2021-10-20	Guanajuato	81	Female		GK	AY.20
	hCoV-19/Mexico/GUA_INER_IMSS_3047/2021	EPI_ISL_6227545		2021-10-15	Guanajuato	46	Male		GK	B.1.617.2
	hCoV-19/Mexico/GUA_INER_IMSS_3048/2021	EPI_ISL_6227452		2021-10-17	Guanajuato	35	Female		GK	AY.3
	hCoV-19/Mexico/GUA_INER_IMSS_3049/2021	EPI_ISL_6227555		2021-10-15	Guanajuato	27	Female		GK	AY.113
	hCoV-19/Mexico/GUA_INER_IMSS_3050/2021	EPI_ISL_6227453		2021-10-18	Guanajuato	55	Male		GK	AY.44
	hCoV-19/Mexico/GUA_INER_IMSS_3051/2021	EPI_ISL_6227454		2021-10-20	Guanajuato	24	Female		GK	AY.26
	hCoV-19/Mexico/GUA_INER_IMSS_3055/2021	EPI_ISL_6227458		2021-10-20	Guanajuato	26	Male		GK	AY.20
	hCoV-19/Mexico/GUA_INER_IMSS_3056/2021	EPI_ISL_6227526		2021-10-20	Guanajuato	27	Female		GK	AY.29.1
	hCoV-19/Mexico/GUA_INER_IMSS_3057/2021	EPI_ISL_6227459		2021-10-22	Guanajuato	81	Female		GK	AY.3
	hCoV-19/Mexico/GUA_INER_IMSS_3064/2021	EPI_ISL_6227466		2021-10-19	Guanajuato	29	Female		GK	AY.26
	hCoV-19/Mexico/GUA_INER_IMSS_3065/2021	EPI_ISL_6227467		2021-10-20	Guanajuato	33	Female		GK	AY.26
	hCoV-19/Mexico/GUA_INER_IMSS_3066/2021	EPI_ISL_6227468		2021-10-21	Guanajuato	49	Male		GK	AY.103
	hCoV-19/Mexico/GUA_INER_IMSS_3067/2021	EPI_ISL_6227469		2021-10-22	Guanajuato	39	Male		GK	AY.20
	hCoV-19/Mexico/GUA_INER_IMSS_3068/2021	EPI_ISL_6227553		2021-10-23	Guanajuato	57	Male		GK	AY.103
	hCoV-19/Mexico/GUA_LANGEBIO_IMSS_2204/2021	EPI_ISL_3805399		2021-07-30	Guanajuato	66	Male		GK	AY.20
	hCoV-19/Mexico/GUA_LANGEBIO_IMSS_2205/2021	EPI_ISL_3805334		2021-07-30	Guanajuato	35	Male		GK	AY.20
	hCoV-19/Mexico/GUA_LANGEBIO_IMSS_2227/2021	EPI_ISL_3805396		2021-07-31	Guanajuato	65	Male		GK	AY.26
	hCoV-19/Mexico/GUA_LANGEBIO_IMSS_2228/2021	EPI_ISL_3805380		2021-07-31	Guanajuato	6	Female		GK	AY.3
	hCoV-19/Mexico/GUA_LANGEBIO_IMSS_2229/2021	EPI_ISL_3805329		2021-08-01	Guanajuato	34	Female		GK	AY.20
	hCoV-19/Mexico/GUA_LANGEBIO_IMSS_2230/2021	EPI_ISL_3805299		2021-08-01	Guanajuato	0	Male		GK	AY.3
	hCoV-19/Mexico/GUA_LANGEBIO_IMSS_2231/2021	EPI_ISL_3805760		2021-08-01	Guanajuato	0	Male		GK	AY.20
	hCoV-19/Mexico/GUA_LANGEBIO_IMSS_2235/2021	EPI_ISL_3805345		2021-08-03	Guanajuato	41	Male		GK	AY.100
	hCoV-19/Mexico/GUA_LANGEBIO_IMSS_2244/2021	EPI_ISL_3805370		2021-08-03	Guanajuato	52	Male		GK	AY.13
	hCoV-19/Mexico/GUA_LANGEBIO_IMSS_2245/2021	EPI_ISL_3805326		2021-08-03	Guanajuato	33	Male		GK	AY.20
	hCoV-19/Mexico/GUA_LANGEBIO_IMSS_2246/2021	EPI_ISL_3805406		2021-08-01	Guanajuato	74	Male		GK	AY.20
	hCoV-19/Mexico/GUA_LANGEBIO_IMSS_2247/2021	EPI_ISL_3805330		2021-08-03	Guanajuato	34	Female		GK	AY.20
	hCoV-19/Mexico/GUA_LANGEBIO_IMSS_2248/2021	EPI_ISL_3805320		2021-07-30	Guanajuato	29	Male		GK	AY.20
	hCoV-19/Mexico/GUA_LANGEBIO_IMSS_2249/2021	EPI_ISL_3805339		2021-07-31	Guanajuato	38	Female		GK	AY.26
	hCoV-19/Mexico/GUA_LANGEBIO_IMSS_2250/2021	EPI_ISL_3805313		2021-08-01	Guanajuato	25	Female		GK	AY.26
	hCoV-19/Mexico/GUA_LANGEBIO_IMSS_2251/2021	EPI_ISL_3805386		2021-08-01	Guanajuato	63	Male		GK	AY.113
	hCoV-19/Mexico/GUA_LANGEBIO_IMSS_2252/2021	EPI_ISL_3805300		2021-07-30	Guanajuato	1	Male		GK	AY.20
	hCoV-19/Mexico/GUA_LANGEBIO_IMSS_2265/2021	EPI_ISL_3805401		2021-08-02	Guanajuato	70	Male		GK	AY.20
	hCoV-19/Mexico/GUA_LANGEBIO_IMSS_2266/2021	EPI_ISL_3805410		2021-08-02	Guanajuato	75	Female		GK	AY.20
	hCoV-19/Mexico/GUA_LANGEBIO_IMSS_2296/2021	EPI_ISL_3805761		2021-08-03	Guanajuato	59	Male		GK	AY.20
	hCoV-19/Mexico/GUA_LANGEBIO_IMSS_2544/2021	EPI_ISL_4549966		2021-08-29	Guanajuato	34	Male		GK	AY.103
	hCoV-19/Mexico/GUA_LANGEBIO_IMSS_2545/2021	EPI_ISL_4549967		2021-08-29	Guanajuato	80	Male		GK	AY.26
	hCoV-19/Mexico/GUA_LANGEBIO_IMSS_2546/2021	EPI_ISL_4549968		2021-08-29	Guanajuato	41	Male		GK	AY.20
	hCoV-19/Mexico/GUA_LANGEBIO_IMSS_2547/2021	EPI_ISL_4549969		2021-08-29	Guanajuato	49	Male		GK	AY.26
	hCoV-19/Mexico/GUA_LANGEBIO_IMSS_2567/2021	EPI_ISL_4549970		2021-08-27	Guanajuato	48	Male		GK	AY.26
	hCoV-19/Mexico/GUA_LANGEBIO_IMSS_2568/2021	EPI_ISL_4549971		2021-08-28	Guanajuato	30	Female		GK	AY.3
	hCoV-19/Mexico/GUA_LANGEBIO_IMSS_2569/2021	EPI_ISL_4549972		2021-08-27	Guanajuato	68	Female		GK	AY.100
	hCoV-19/Mexico/GUA_LANGEBIO_IMSS_2570/2021	EPI_ISL_4549973		2021-08-28	Guanajuato	49	Female		GK	AY.26
	hCoV-19/Mexico/GUA_LANGEBIO_IMSS_2571/2021	EPI_ISL_4549974		2021-08-28	Guanajuato	23	Male		GK	AY.26
	hCoV-19/Mexico/GUA_LANGEBIO_IMSS_2572/2021	EPI_ISL_4549975		2021-08-28	Guanajuato	28	Female		GK	AY.26
	hCoV-19/Mexico/GUA_LANGEBIO_IMSS_2573/2021	EPI_ISL_4549976		2021-08-28	Guanajuato	30	Male		GK	AY.3
	hCoV-19/Mexico/GUA_LANGEBIO_IMSS_2574/2021	EPI_ISL_4549977		2021-08-29	Guanajuato	27	Female		GK	AY.20
	hCoV-19/Mexico/GUA_LANGEBIO_IMSS_2575/2021	EPI_ISL_4549978		2021-08-30	Guanajuato	25	Male		GK	AY.20
	hCoV-19/Mexico/GUA_LANGEBIO_IMSS_2576/2021	EPI_ISL_4549979		2021-08-27	Guanajuato	13	Male		GK	AY.20
	hCoV-19/Mexico/GUA_LANGEBIO_IMSS_2577/2021	EPI_ISL_4549980		2021-08-29	Guanajuato	24	Male		GK	AY.3
	hCoV-19/Mexico/GUA_LANGEBIO_IMSS_2578/2021	EPI_ISL_4549981		2021-08-26	Guanajuato	27	Female		GK	AY.26
	hCoV-19/Mexico/GUA_LANGEBIO_IMSS_2579/2021	EPI_ISL_4549982		2021-08-26	Guanajuato	33	Female		GK	AY.20
	hCoV-19/Mexico/GUA_LANGEBIO_IMSS_2586/2021	EPI_ISL_4549983		2021-08-30	Guanajuato	33	Male		GK	AY.100
	hCoV-19/Mexico/GUA_LANGEBIO_IMSS_3055/2021	EPI_ISL_5851087		2021-09-29	Guanajuato	27	Male		GK	AY.3
	hCoV-19/Mexico/GUA_LANGEBIO_IMSS_3065/2021	EPI_ISL_5851098		2021-09-28	Guanajuato	46	Female		GK	AY.20
	hCoV-19/Mexico/GUA_LANGEBIO_IMSS_3066/2021	EPI_ISL_5851099		2021-09-29	Guanajuato	61	Male		GK	AY.26
	hCoV-19/Mexico/GUA_LANGEBIO_IMSS_3067/2021	EPI_ISL_5851100		2021-09-29	Guanajuato	77	Male		GK	AY.20
	hCoV-19/Mexico/GUA_LANGEBIO_IMSS_3068/2021	EPI_ISL_5851101		2021-09-29	Guanajuato	90	Female		GK	AY.20
	hCoV-19/Mexico/GUA_LANGEBIO_IMSS_3069/2021	EPI_ISL_5851102		2021-09-29	Guanajuato	37	Female		GK	AY.20
	hCoV-19/Mexico/GUA_LANGEBIO_IMSS_3070/2021	EPI_ISL_5851104		2021-09-29	Guanajuato	61	Male		GK	AY.100
	hCoV-19/Mexico/GUA_LANGEBIO_IMSS_3078/2021	EPI_ISL_5851113		2021-09-30	Guanajuato	76	Male		GK	AY.20
	hCoV-19/Mexico/GUA_LANGEBIO_IMSS_3079/2021	EPI_ISL_5851114		2021-10-01	Guanajuato	50	Male		GK	AY.3
	hCoV-19/Mexico/GUA_LANGEBIO_IMSS_3080/2021	EPI_ISL_5851115		2021-10-01	Guanajuato	37	Female		GK	AY.98
	hCoV-19/Mexico/GUA_LANGEBIO_IMSS_3081/2021	EPI_ISL_5851116		2021-09-30	Guanajuato	30	Female		GK	AY.20
	hCoV-19/Mexico/GUA_LANGEBIO_IMSS_3082/2021	EPI_ISL_5851117		2021-09-30	Guanajuato	53	Male		GK	AY.26
	hCoV-19/Mexico/GUA_LANGEBIO_IMSS_3083/2021	EPI_ISL_5851118		2021-09-30	Guanajuato	70	Male		GK	AY.39
	hCoV-19/Mexico/GUA_LANGEBIO_IMSS_3084/2021	EPI_ISL_5851119		2021-09-30	Guanajuato	66	Female		GK	AY.20
	hCoV-19/Mexico/GUA_LANGEBIO_IMSS_3085/2021	EPI_ISL_5851120		2021-09-30	Guanajuato	72	Male		GK	AY.20
	hCoV-19/Mexico/GUA_LANGEBIO_IMSS_3086/2021	EPI_ISL_5851121		2021-09-30	Guanajuato	58	Female		GK	AY.26
	hCoV-19/Mexico/GUA_LANGEBIO_IMSS_3332/2021	EPI_ISL_6775616		2021-10-24	Guanajuato	59	Female		GK	AY.26
	hCoV-19/Mexico/GUA_LANGEBIO_IMSS_3333/2021	EPI_ISL_6775617		2021-10-19	Guanajuato	56	Male		GK	AY.20
	hCoV-19/Mexico/GUA_LANGEBIO_IMSS_3334/2021	EPI_ISL_6775618		2021-10-23	Guanajuato	63	Female		GK	AY.100
	hCoV-19/Mexico/GUA_LANGEBIO_IMSS_3335/2021	EPI_ISL_6775620		2021-10-24	Guanajuato	26	Female		GK	AY.3
	hCoV-19/Mexico/GUA_LANGEBIO_IMSS_3343/2021	EPI_ISL_6775621		2021-10-22	Guanajuato	28	Male		GK	AY.100
	hCoV-19/Mexico/GUA_LANGEBIO_IMSS_3344/2021	EPI_ISL_6775622		2021-10-22	Guanajuato	36	Female		GK	AY.3
	hCoV-19/Mexico/GUA_LANGEBIO_IMSS_3345/2021	EPI_ISL_6775623		2021-10-26	Guanajuato	24	Male		GK	AY.20
	hCoV-19/Mexico/GUA_LANGEBIO_IMSS_3346/2021	EPI_ISL_6775624		2021-10-25	Guanajuato	28	Female		GK	AY.3
	hCoV-19/Mexico/GUA_LANGEBIO_IMSS_3347/2021	EPI_ISL_6775625		2021-10-25	Guanajuato	57	Female		GK	AY.20
	hCoV-19/Mexico/GUA_LANGEBIO_IMSS_3348/2021	EPI_ISL_6775626		2021-10-25	Guanajuato	75	Male		GK	AY.20
	hCoV-19/Mexico/GUA_LANGEBIO_IMSS_3349/2021	EPI_ISL_6775627		2021-10-24	Guanajuato	54	Male		GK	AY.3
	hCoV-19/Mexico/GUA_LANGEBIO_IMSS_3350/2021	EPI_ISL_6775628		2021-10-23	Guanajuato	44	Male		GK	AY.20
	hCoV-19/Mexico/GUA_LANGEBIO_IMSS_3351/2021	EPI_ISL_6775629		2021-10-24	Guanajuato	48	Male		GK	B.1.617.2
	hCoV-19/Mexico/GUA_LANGEBIO_IMSS_3352/2021	EPI_ISL_6775630		2021-10-22	Guanajuato	77	Male		GK	AY.3
[truncated: 17,770 more rows]
