# Supplementary material for: Dominance of Three Sublineages of the SARS-CoV-2 Delta Variant in Mexico
Source: Preprints.org preprint supplement (doi:10.20944/preprints202205.0131.v1), 2022-05-10
Supplement: Supplementary file 3 [file supplementary]

Archive with 4 entries (4 files):
- SuppFigures_v3.pdf
- __MACOSX/._SuppFigures_v3.pdf
- Table_S1.xlsx
- __MACOSX/._Table_S1.xlsx
